# Supplementary material for: Designing sustainable weaning foods for developing countries: not only a matter of nutrients
Source: Royal Society of Chemistry journal article supplement (doi:10.1039/d3fo02832a), 2023-01-01
Supplement: d3fo02832a1.xlsx [file d3fo02832a1.xlsx]

## Sheet: WAC WSI
Sample	tube+cab	tube+cab+sediment	weight of sediment	dry-tray	dried-tray	weight of dissolved solid in supernatant	WAI	WSI
(1)SF1.1	12.7122	24.6212	11.909	1.2512	1.3311	0.0799	4.7636	3.196
(1)SF1.2	12.6389	24.3856	11.7467	1.2414	1.3194	0.078	4.69868	3.12				WAI		std	Letter
(1)SF2.1	9.8071	24.9881	15.181	1.2823	1.3567	0.0744	6.0724	2.976				SF	5.37835	0.748781	A
(1)SF2.2	9.563	24.5098	14.9468	1.2833	1.3518	0.0685	5.97872	2.74				FSF	5.02451	0.169211	AB
(3)FSF48.1.1	12.5884	24.8087	12.2203	1.2484	1.3304	0.082	4.88812	3.28				CnG	4.40313	0.331631	B
(3)FSF48.1.2	12.6389	24.8252	12.1863	1.2407	1.3166	0.0759	4.87452	3.036				CG	4.9398	0.261553	AB
(3)FSF48.2.1	9.5048	22.3152	12.8104	1.2843	1.439	0.1547	5.12416	6.188
(3)FSF48.2.2	9.5487	22.5768	13.0281	1.2865	1.4477	0.1612	5.21124	6.448
(4)CSF.NG.1.1	12.6831	24.1875	11.5044	1.2489	1.3725	0.1236	4.60176	4.944				WSI	Mean	std	Letter
(4)CSF.NG.1.2	12.9161	24.4856	11.5695	1.2551	1.3831	0.128	4.6278	5.12				SF	3.008	0.200612	C
(4)CSF.NG.2.1	9.7609	19.554	9.7931	1.2844	1.421	0.1366	3.91724	5.464				FSF	4.738	1.83022	B
(4)CSF.NG.2.2	9.7264	20.8907	11.1643	1.2826	1.4514	0.1688	4.46572	6.752				CnG	5.57	0.817055	AB
(5)CSF.GS.1.1	12.6989	25.5986	12.8997	1.2624	1.4269	0.1645	5.15988	6.58				CG	6.941	0.404302	A
(5)CSF.GS.1.2	12.6005	25.5251	12.9246	1.2544	1.4195	0.1651	5.16984	6.604
(5)CSF.GS.2.1	9.6901	21.3873	11.6972	1.2789	1.4621	0.1832	4.67888	7.328
(5)CSF.GS.2.2	9.7109	21.5874	11.8765	1.2778	1.4591	0.1813	4.7506	7.252
		sample weight	2.5

## Sheet: OAI
Sample	Tube+cap	Tube+cap_oil	Oil weight	dry weight	OAI
(1)SF1.1	5.4513	6.3162	0.8649	0.524	1.65057
(1)SF1.2	5.4784	6.4567	0.9783	0.5736	1.70554
(1)SF2.1	4.5026	5.3647	0.8621	0.5041	1.71018			OAI	Mean	SD	Letter
(1)SF2.2	4.492	5.3915	0.8995	0.5182	1.73582			SF	1.70053	0.0358658	B
(3)FSF48.1.1	4.5231	5.4424	0.9193	0.5023	1.83018			FSF	1.84211	0.1083	AB
(3)FSF48.1.2	4.5442	5.462	0.9178	0.542	1.69336			CnG	1.71567	0.0413171	B
(3)FSF48.2.1	4.511	5.4832	0.9722	0.5052	1.92439			CG	1.84469	0.0750981	AB
(3)FSF48.2.2	4.5265	5.5027	0.9762	0.5083	1.92052
(4)CSF.NG.1.1	5.4708	6.4613	0.9905	0.5706	1.73589
(4)CSF.NG.1.2	5.4529	6.4378	0.9849	0.5588	1.76253
(4)CSF.NG.2.1	4.5036	5.3708	0.8672	0.5191	1.67058
(4)CSF.NG.2.2	4.464	5.3254	0.8614	0.5086	1.69367
(5)CSF.GS.1.1	5.4448	6.5357	1.0909	0.57	1.91386
(5)CSF.GS.1.2	5.4956	6.5011	1.0055	0.5277	1.90544
(5)CSF.GS.2.1	4.4792	5.4003	0.9211	0.518	1.77819
(5)CSF.GS.2.2	4.5101	5.4043	0.8942	0.502	1.78127

## Sheet: Bulk
	volume	weight	Bulk
(1)SF1.1	5.5	4.7801	0.869109
(1)SF1.2	5.5	4.8808	0.887418
(1)SF2.1	6	4.9376	0.822933		Code	Sample		Mean	SD	Letter
(1)SF2.2	5.5	4.7021	0.854927		SF	F1	SF	0.858597	0.0272429	A
(3)FSF48.1.1	6	4.2205	0.703417		FSF	F3	FSF48	0.70767	0.0189693	B
(3)FSF48.1.2	6	4.2205	0.703417		CnG	F4	CSF-NG	0.739659	0.0638312	B
(3)FSF48.2.1	5.8	3.999	0.689483		CG	F5	CSF-GS	0.709705	0.0305508	B
(3)FSF48.2.2	5.5	4.039	0.734364
(4)CSF.NG.1.1	6.5	4.2658	0.656277
(4)CSF.NG.1.2	5.5	4.0962	0.744764
(4)CSF.NG.2.1	5.8	4.3255	0.745776
(4)CSF.NG.2.2	5	4.0591	0.81182
(5)CSF.GS.1.1	5	3.6041	0.72082
(5)CSF.GS.1.2	5	3.3369	0.66738
(5)CSF.GS.2.1	5.5	3.9116	0.7112
(5)CSF.GS.2.2	5.5	4.0668	0.739418

## Sheet: pH
Batch	Code	Sample	Fortification	Time	Germination	Cooking	pH
1	SF b	F1	Not fortificated	Not fermented	-	Not cooked	6.373				Code	Sample	Mean	SD	Letter
1	SF b	F1	Not fortificated	Not fermented	-	Not cooked	6.355				SF	F1	6.33233	0.0316207	A
1	SF b	F1	Not fortificated	Not fermented	-	Not cooked	6.353				FSF	F3	3.83867	0.0683598	C
2	SF b	F1	Not fortificated	Not fermented	-	Not cooked	6.31				CnG	F4	4.423	0.00781025	B
2	SF b	F1	Not fortificated	Not fermented	-	Not cooked	6.303				CG	F5	4.456	0.0506853	B
2	SF b	F1	Not fortificated	Not fermented	-	Not cooked	6.3
1	FSF48 b	F3	Not fortificated	Fermented (48h)	-	Not cooked	3.894
1	FSF48 b	F3	Not fortificated	Fermented (48h)	-	Not cooked	3.895
1	FSF48 b	F3	Not fortificated	Fermented (48h)	-	Not cooked	3.913
2	FSF48 b	F3	Not fortificated	Fermented (48h)	-	Not cooked	3.771
2	FSF48 b	F3	Not fortificated	Fermented (48h)	-	Not cooked	3.783
2	FSF48 b	F3	Not fortificated	Fermented (48h)	-	Not cooked	3.776
1	CSFNG b	F4	Pumpkin seed	Fermented (48h)	Not germinated	Not cooked	4.418
1	CSFNG b	F4	Pumpkin seed	Fermented (48h)	Not germinated	Not cooked	4.419
1	CSFNG b	F4	Pumpkin seed	Fermented (48h)	Not germinated	Not cooked	4.432
1	CSFGS b	F5	Pumpkin seed	Fermented (48h)	Germinated	Not cooked	4.439
1	CSFGS b	F5	Pumpkin seed	Fermented (48h)	Germinated	Not cooked	4.416
1	CSFGS b	F5	Pumpkin seed	Fermented (48h)	Germinated	Not cooked	4.513

## Sheet: Alpha-amylase
			Blank Wheat	0.0086	0.8168				Wheat	A400x0.313	0.313
					CU/g				Malt	A400x376	376
Wheat Extract	NG.1.1	0.2976	0.289		0.090457				Microbial	A400x4.7xDilution	4.7
	NG.1.2	0.2903	0.2817		0.0881721
	NG.2.1	2.094	2.0854		0.65273
	NG.2.2	2.0951	2.0865		0.653075
	(1)SF1.1	0.5577	0.5491		0.171868
	(1)SF1.2	0.5983	0.5897		0.184576
	(1)SF2.1	1.4178	1.4092		0.44108
	(1)SF2.2	1.4181	1.4095		0.441173
			Blank Malt	0.8191
Malt Extract	GS.1.1	0.8267	0.0076		2.8576					Alpha-amylase	SD	Letter
	GS.1.2	0.8324	0.0133		5.0008				NG	0.371108	0.325389	B
	GS.2.1	0.8338	0.0147		5.5272				GS	3.9668	1.52098	A
	GS.2.2	0.8257	0.0066		2.4816				SF	0.309674	0.151877	B
			Blank bacterial	0.857633					FSF	3.36833	1.33241	A
Bacterial Extract	(3)FSF48.1.1	0.9597		0.102067	4.79713				CnG	3.12292	0.442618	A
	(3)FSF48.1.2	0.9472		0.0895667	4.20963				CG	2.84233	0.421546	A
	(3)FSF48.2.1	0.9051		0.0474667	2.23093
	(3)FSF48.2.2	0.9052		0.0475667	2.23563
	(4)CSF.NG.1.1	0.9629		0.105267	2.47377
	(4)CSF.NG.1.2	1.0012		0.143567	3.37382
	(4)CSF.NG.2.1	1.5878		0.730167	3.43178
	(4)CSF.NG.2.2	1.5411		0.683467	3.21229
	(5)CSF.GS.1.1	0.9629		0.105267	2.47377
	(5)CSF.GS.1.2	0.9632		0.105567	2.48082
	(5)CSF.GS.2.1	1.5414		0.683767	3.2137
	(5)CSF.GS.2.2	1.5387		0.681067	3.20101

## Sheet: Moisture
Sample		tray	sample	tray+sample(dried)			%		Code	Sample	%moisture as is	std	Letter
F1	SP0.1.1	1.2431	3.0556	3.9917	2.7486	0.307	10.0471		SP	F1	9.43296	1.06414	A
F1	SP0.1.2	1.2315	3.0423	3.9508	2.7193	0.323	10.617		FSP	F3	6.84218	1.5238	B
F1	SP0.2.1	1.2338	3.0771	4.0475	2.8137	0.2634	8.56001		CnGP	F4	4.17806	1.39995	C
F1	SP0.2.2	1.2399	3.0772	4.0553	2.8154	0.2618	8.50773		CGP	F5	3.68535	0.189989	C
F3	FSP.48.1.1	1.2315	3.0322	4.1054	2.8739	0.1583	5.22063
F3	FSP48.1.2	1.2284	3.0917	4.1388	2.9104	0.1813	5.86409
F3	FSP48.2.1	1.2245	3.0433	4.0206	2.7961	0.2472	8.12276
F3	FSP48.2.2	1.296	3.0412	4.089	2.793	0.2482	8.16125
F4	CSP.NG.1.1	1.2673	3.0138	4.1929	2.9256	0.0882	2.92654
F4	CSP.NG.1.2	1.2695	3.075	4.252	2.9825	0.0925	3.00813
F4	CSP.NG.2.1	1.2709	3.0097	4.116	2.8451	0.1646	5.46898
F4	CSP.NG.2.2	1.2647	3.0705	4.1722	2.9075	0.163	5.30858
F5	CSP.GS.1.1	1.2681	3.0117	4.1718	2.9037	0.108	3.58601
F5	CSP.GS.1.2	1.2911	3.0433	4.2289	2.9378	0.1055	3.46663
F5	CSP.GS.2.1	1.2785	3.0182	4.1807	2.9022	0.116	3.84335
F5	CSP.GS.2.2	1.2677	3.0894	4.2383	2.9706	0.1188	3.84541

## Sheet: Fibre and Ash
	Step1	Step11			Step15			Step17		Step16
		Weight of crucible+celite (g)	Weight of crucible + sample (dry over night) (g)	weight of residue (g)	Uncorrd av sample residue (USAR) (mg)	crucible + celite + residue(ash) (g)	weight of ash (g)	Protein (%)	Sample protein residue (SPR)	Ash (%) (W2-w1)/Ws x100	Sample ash residue (SAR)	Corrected blank (CB) (mg)	Corrected sample residue (CSR)	mg sample	CSR/mg sample	%TDF		Adjust for fat	Adjust for moisture+fat
Sample	sample dry weight (g)					after furnance											100	18.9139
NG.1.1	1.0075	51.3089	51.7947	0.4858	509.05	51.4223	0.1134		0	11.2556	57.2965		190.557	1007.5	0.189139	18.9139	51.4536	9.73188	9.73188				Fibre	Fat corrected				Not blank corrected
NG.1.2	1.0043	50.4008	50.9331	0.5323				43.4546	221.205		0			1004.3	0	0	100	23.28		9.43992			%TDF	percentage	std		Ash	%ASH avg.	std
NG.2.1	1.0412	51.1449	51.7089	0.564	545.8			48.2627	0		0		242.391	1041.2	0.2328	23.28	51.4536	11.9784	11.9784				NG	10.8551	1.58853		NG	10.2254	1.45693
NG.2.2	1.0114	51.5905	52.1181	0.5276		51.6835	0.093		263.418	9.19518	50.1873			1011.4	0	0	100	27.0428		11.6191			GS	15.2602	2.63173		GS	7.06743	0.964883
GS.1.1	1.0005	51.3451	51.751	0.4059	375.85			17.373	0		0		270.563	1000.5	0.270428	27.0428	63.3114	17.1212	17.1212				(1)SP0	9.62316	1.81458		(1)SP	3.52743	0.127302
GS.1.2	1.0775	51.4072	51.753	0.3458		51.476	0.0688		65.2964	6.38515	23.9986			1077.5	0	0	100	21.1642		16.6075			(3) FSP48	9.54753	0.602731		(3)FSP48	4.11104	0.992261
GS.2.1	1.0283	51.364	51.7447	0.3807	373.3			30.988	0		0		217.631	1028.3	0.211642	21.1642	63.3114	13.3993	13.3993				(4)CSP.NG	8.89384	0.940022		(4)CSP.NG	4.36247	0.19113
GS.2.2	1.0052	50.6621	51.028	0.3659		50.74	0.0779		115.678	7.7497	28.9296			1005.2	0	0	100	8.51362		12.9974			(5)CSP.GS	10.3865	3.77461		(5)CSP.GS	4.89051	1.29824
(1)SP1.1	1.0013	51.6704	51.8032	0.1328	149.6			16.2851	0		0		85.2468	1001.3	0.0851362	8.51362	97.9615	8.34006	8.34006
(1)SP1.2	1.0473	50.622	50.7884	0.1664		50.658	0.036		24.3625	3.43741	5.14237			1047.3	0	0	100	11.1332		1.66801
(1)SP2.1	1.0001	51.6132	51.7771	0.1639	168.85			10.3737	0		0		111.343	1000.1	0.111332	11.1332	97.9615	10.9063	10.9063				Fibre	Fat and moisture corrected				Blank corrected
(1)SP2.2	1.009	51.4432	51.617	0.1738		51.4797	0.0365		17.516	3.61744	6.10805			1009	0	0	100	9.38503		2.18125			%TDF	percentage	std		Ash	%ASH avg.	std
(3)FSP48.1.1	1.0331	51.0466	51.195	0.1484	152.55			10.2278	#REF!		0		96.9567	1033.1	0.0938503	9.38503	97.1903	9.12134	9.12134				NG	10.5295	1.54088		NG	6.94538	1.45693
(3)FSP48.2.2	1.0823	50.4278	50.5845	0.1567		50.4647	0.0369		15.6025	3.40941	5.20105			1082.3	0	0	100	10.2621		1.82427			GS	14.8024	2.55278		GS	3.78743	0.964883
(3)FSP48.2.1	1.0171	51.0027	51.1827	0.18	168.95			14.551	0		0		104.375	1017.1	0.102621	10.2621	97.1903	9.97373	9.97373				(1)SP0	1.92463	0.362915		(1)SP	0.247427	0.127302
(3)FSP48.2.2	1.0036	51.8446	52.0025	0.1579		51.8929	0.0483		24.5839	4.81267	8.13101			1003.6	0	0	100	11.2264		1.99475			(3) FSP48	1.90951	0.120546		(3)FSP48	0.83104	0.992261
(4)CSP.NG.1.1	1.0072	51.4684	51.6953	0.2269	217.35	51.5137	0.0453		0	4.49762	9.77557		113.072	1007.2	0.112264	11.2264	85.1433	9.55854	9.55854				(4)CSP.NG	1.77877	0.188004		(4)CSP.NG	1.08247	0.19113
(4)CSP.NG.1.2	1.0032	51.6968	51.9046	0.2078				25.08	54.5113		0			1003.2	0	0	100	9.66505		1.91171			(5)CSP.GS	2.0773	0.754922		(5)CSP.GS	1.61051	1.29824
(4)CSP.NG.2.1	1.003	51.4109	51.6111	0.2002	200.3	51.4533	0.0424		0	4.22732	8.46732		96.9405	1003	0.0966505	9.66505	85.1433	8.22915	8.22915
(4)CSP.NG.2.2	1.008	51.0093	51.2097	0.2004				27.4096	54.9015		0			1008	0	0	100	14.616		1.64583
(5)CSP.GS.1.1	1.0044	50.116	50.328	0.212	237.55	50.1559	0.0399		0	3.97252	9.43672		146.803	1004.4	0.14616	14.616	89.3238	13.0555	13.0555
(5)CSP.GS.1.2	1.0082	51.0688	51.3319	0.2631				17.3942	41.3198		0			1008.2	0	0	100	8.63984		2.61111
(5)CSP.GS.2.1	1.0037	51.4766	51.6713	0.1947	188.2	51.5349	0.0583		0	5.80851	10.9316		86.718	1003.7	0.0863984	8.63984	89.3238	7.71743	7.71743
(5)CSP.GS.2.2	1.006	51.2054	51.3871	0.1817				26.8649	50.5597		0			1006	0	0				1.54349
Blank1	0	50.3475	50.3794	0.0319	43.5			4.78735	0		0	39.9907												Ash percentage (w/w)				%ASH avg.	std
Blank2	0	50.9599	51.015	0.0551		50.9927	0.0328		2.0825	3.28	1.4268													NG	11.2556		NG	10.2254	1.45693
					UABR																			NG	9.19518		GS	7.06743	0.964883
																								GS	6.38515		(1)SP	3.52743	0.127302
																								GS	7.7497		(3)FSP48	4.11104	0.992261
																fat	percentage	(+/-)						SP	3.43741		(4)CSP.NG	4.36247	0.19113
											Moisture of porridge	Moisture of seeds				NG	48.5464	2.05035						SP	3.61744		(5)CSP.GS	4.89051	1.29824
											0.2	0.97				GS	36.6886	0.817727						FSP48	3.40941		Adjusted for blank
											0.2	0.97				(1)SP0	2.03852	0.123353						FSP48	4.81267			%ASH avg.	std
																(3) FSP48	2.80972	0.84869						CSP.NG	4.49762		NG	6.94538	1.45693
																(4)FSP-NG	14.8567	1.00502						CSP.NG	4.22732		GS	3.78743	0.964883
																(5)FSP-GS	10.6762	1.2107						CSP.GS	3.97252		(1)SP	0.247427	0.127302
																								CSP.GS	5.80851		(3)FSP48	0.83104	0.992261
																											(4)CSP.NG	1.08247	0.19113
																											(5)CSP.GS	1.61051	1.29824

## Sheet: Protein
Code	Sample	weight (mg)	protein factor	nitrogen (%)	protein (%)		Code	Sample	Mean	SD	Letter
NG	NG	12.0865	6.25	5.79819	36.2387			NG	35.6285	0.818682	A
NG	NG	11.2465	6.25	5.775	36.0937			GS	35.1836	2.14917	A
NG	NG	12.839	6.25	5.71847	35.7404		F1	SF	10.6329	0.396486	C
NG	NG	11.759	6.25	5.51061	34.4413		F3	FSF48	9.83746	2.19854	C
GS	GS	11.8325	6.25	5.90462	36.9039		F4	CSFNG	17.9427	0.955975	B
GS	GS	11.246	6.25	5.94889	37.1806		F5	CSFGS	18.2478	0.821235	B
GS	GS	10.318	6.25	5.32816	33.301
GS	GS	11.7315	6.25	5.33586	33.3491
F1	SP	14.786	6.25	1.72786	10.7991
F1	SP	11.254	6.25	1.69448	10.5905
F1	SP	16.834	6.25	1.61678	10.1049
F1	SP	16.7145	6.25	1.76594	11.0371
F3	FSP48	11.6745	6.25	1.67394	10.4621
F3	FSP48	13.1155	6.25	1.69404	10.5877
F3	FSP48	13.5105	6.25	1.86564	11.6602
F3	FSP48	13.278	6.25	1.06237	6.63978
F4	CSP.NG	11.681	6.25	2.76	17.23
F4	CSP.NG	10.056	6.25	2.72	17.01
F4	CSP.NG	12.8455	6.25	3.01396	18.8373
F4	CSP.NG	10.1885	6.25	2.99094	18.6934
F5	CSP.GS	11.535	6.25	2.72	17.03
F5	CSP.GS	11.789	6.25	2.96	18.52
F5	CSP.GS	13.823	6.25	3.0109	18.8181
F5	CSP.GS	14.49	6.25	2.9797	18.6231

## Sheet: Lipid
Code	Sample	powder weight	Flask+stone	Flask+stone+lipid		Percentage		Code	Sample		Mean	SD	Letter
NG	NG1.1	3.0407	101.728	103.157	1.4288	46.9892				NG	48.5464	2.05035	A
NG	NG1.2	3.029	107.542	108.957	1.4148	46.7085				GS	36.6886	0.817727	B
NG	NG2.1	4.0534	107.642	109.708	2.0659	50.9671		SF	F1	(1)SP0	2.03852	0.123353	E
NG	NG2.2	4.0367	107.623	109.622	1.999	49.5206		FSF48	F3	(3) FSP48	2.80972	0.84869	E
GS	GS1.1	3.0605	103.918	105.026	1.1085	36.2196		CSFNG	F4	(4)FSP-NG	14.8567	1.00502	C
GS	GS1.2	3.0199	110.336	111.418	1.0813	35.8058		CSFGS	F5	(5)FSP-GS	10.6762	1.2107	D
GS	GS2.1	3.0176	108.205	109.326	1.121	37.1487
GS	GS2.2	3.0532	107.092	108.239	1.1474	37.5802
F1	(1)SP1.1	5.0726	108.29	108.387	0.097	1.91223
F1	(1)SP1.2	4.7253	99.8055	99.8978	0.0923	1.95332
F1	(1)SP2.1	5.0039	104.714	104.822	0.1076	2.15032
F1	(1)SP2.2	1.0476	105.193	105.215	0.0224	2.13822
F3	(3)FSP48.1.1	5.0595	107.23	107.377	0.1477	2.91926
F3	(3)FSP48.2.2	5.052	107.802	108.003	0.2005	3.96873
F3	(3)FSP48.2.1	5.0741	99.7517	99.861	0.1093	2.15408
F3	(3)FSP48.2.2	5.071	106.164	106.276	0.1114	2.19681
F4	(4)CSP.NG.1.1	4.159	107.337	107.989	0.6518	15.672
F4	(4)CSP.NG.1.2	4.0418	105.552	106.19	0.6378	15.7801
F4	(4)CSP.NG.2.1	5.0416	99.4642	100.171	0.7064	14.0114
F4	(4)CSP.NG.2.2	5.059	99.4642	100.171	0.7064	13.9632
F5	(5)CSP.GS.1.1	4.0185	98.0621	98.5335	0.4714	11.7307
F5	(5)CSP.GS.1.2	4.0586	107.769	108.244	0.4756	11.7183
F5	(5)CSP.GS.2.1	5.0206	109.217	109.702	0.4848	9.65622
F5	(5)CSP.GS.2.2	5.0481	106.978	107.463	0.4846	9.59965

## Sheet: Carbohydrates and Energy
	protein	Moisture	Ash	Fat	Carbohydrate	Energy
NG	36.24		11.26	46.99	N/A	N/A
NG	36.09		9.2	46.71	N/A	N/A
NG	35.74			50.97	N/A	N/A			Carb	Mean	SD
NG	34.44			49.52	N/A	N/A			(1)SP0	78.1675	3.17799
GS	36.9		6.39	36.22	N/A	N/A			(3) FSP48	81.2675	2.77356
GS	37.18		7.75	35.81	N/A	N/A			(4)CSP.NG	75.695	0.272091
GS	33.3			37.15	N/A	N/A			(5)CSP.GS	75.62	2.47299
GS	33.35			37.58	N/A	N/A
1	10.8	10.05	3.44	1.91	75.71	1518.3			Energy	Mean	SD
1	10.59	10.62	3.62	1.95	75.17	1507.27			(1)SP0	1561.39	56.3027
1	10.1	8.56		2.15	81.34	1609.76			(3) FSP48	1628.99	13.2021
1	11.04	8.51		2.14	80.45	1610.22			(4)CSP.NG	2124.46	19.2528
3	10.46	5.22	3.41	2.92	80.91	1637.56			(5)CSP.GS	1971.15	12.0102
3	10.59	5.86	4.81	3.97	78.74	1642.95
3	11.66	8.12		2.15	80.22	1617.12
3	6.64	8.16		2.2	85.2	1618.33
4	17.23	2.93	4.5	15.67	75.34	2137.28
4	17.01	3.01	4.23	15.78	75.75	2144.59
4	18.84	5.47		14.01	75.69	2107.6
4	18.69	5.31		13.96	76	2108.39
5	17.03	3.59	3.97	11.73	75.41	1986.88
5	18.52	3.47	5.81	11.72	72.2	1957.74
5	18.82	3.84		9.66	77.34	1971.2
5	18.62	3.85		9.6	77.53	1968.78
				(1)SP0	1561.39
				(2)FSP24	1639.91
				(3) FSP48	1628.99
				(4)CSP.NG	2124.46
				(5)CSP.GS	1971.15

[truncated: 2 more sheets: Phytic acid, Viscosity]
