# Supplementary material for: Designing sustainable weaning foods for developing countries: not only a matter of nutrients
Source: Royal Society of Chemistry journal article supplement (doi:10.1039/d3fo02832a), 2023-01-01
Supplement: d3fo02832a2.xlsx [file d3fo02832a2.xlsx]

## Sheet: Raw data after digestion
				Gastric phase time 0									Gastric phase 2h									Intestinal phase 15 min									Intestinal phase 30 min									Intestinal phase 60 min					Intestinal phase 120 min
	Mean	SD		Sampling	Sample	Abs (mean)	Abs (SD)			Mean	SD		Sampling	Sample	Abs (mean)	Abs (SD)			Mean	SD		Sampling	Sample	Abs (mean)	Abs (SD)			Mean	SD		Sampling	Sample	Abs (mean)	Abs (SD)			Mean	SD		Sampling	Sample	Abs (mean)	Abs (SD)		Sampling	Sample	Abs (mean)	Abs (SD)
Blank	0.0142583	0.00223991		1	1	0.0320958	0.0101875		Blank	0.0169583	0.00194911		2	1	0.0408556	0.0121168		Blank	0.0110583	0.00129507		3	1	0.523033	0.0488907		Blank	0.011225	0.00160744		4	1	0.593292	0.0548696		Blank	0.0106417	0.00166813		5	1	0.6639	0.0467943		6	1	0.651596	0.0447555
Std	1.13912	0.0147158		1	3	0.101275	0.011827		Std	1.14778	0.0236115		2	3	0.124104	0.0197793		Std	1.13149	0.0147127		3	3	0.574838	0.0402986		Std	1.12034	0.0201762		4	3	0.681013	0.0359146		Std	1.1339	0.0127711		5	3	0.762717	0.0194531		6	3	0.764908	0.049463
				1	4	0.08405	0.0129377						2	4	0.0990833	0.0114825						3	4	0.523258	0.031136						4	4	0.559483	0.0455744						5	4	0.618613	0.0467494		6	4	0.601225	0.0340577
				1	5	0.112575	0.0142803						2	5	0.132054	0.0170729						3	5	0.520154	0.0263714						4	5	0.577958	0.0396178						5	5	0.604692	0.0595424		6	5	0.654346	0.0325229
				1	9	0.026325	0.00887646						2	9	0.0362625	0.00747708						3	9	0.474958	0.0163727						4	9	0.508471	0.028759						5	9	0.553312	0.0213383		6	9	0.564325	0.0172039
				1	12	0.0744042	0.00928151						2	12	0.0837	0.0049273						3	12	0.565154	0.0222607						4	12	0.617871	0.0591406						5	12	0.694617	0.0658826		6	12	0.732954	0.0482309
				1	18	0.0915167	0.0228208						2	18	0.120544	0.0126571						3	18	0.582479	0.0299374						4	18	0.660079	0.0320997						5	18	0.707183	0.0480868		6	18	0.751992	0.0445795
				1	Blank	0.0249694	0.0061183						2	Blank	0.0161667	0.00277025						3	Blank	0.143292	0.00551483						4	Blank	0.144183	0.00447019						5	Blank	0.146961	0.00468391		6	Blank	0.147006	0.00580871
First day				Sampling 1					Secon day first analysis				Sampling 2					Secon day second analysis				Sampling 3					Third day first analysis				Sampling 4					Third day second analysis				Sampling 5					Sampling 6
	Abs			Sample	Batch	Replicates	Abs (510 nm)			Abs			Sample	Batch	Replicates	Abs (510 nm)			Abs			Sample	Batch	Replicates	Abs (510 nm)			Abs			Sample	Batch	Replicates	Abs (510 nm)			Abs			Sample	Batch	Replicates	Abs (510 nm)		Sample	Batch	Replicates	Abs (510 nm)
Blank A1	0.0153			1	1	a1	0.0148		Blank A1	0.0163			1	1	a1	0.0287		Blank A1	0.01			1	1	a1	0.5426		Blank A1	0.0115			1	1	a1	0.6398		Blank A1	0.0113			1	1	a1	0.7163		1	1	a1	0.6951
Blank A2	0.0153			1	1	a1	0.0145		Blank A2	0.0156			1	1	a1	0.028		Blank A2	0.0103			1	1	a1	0.5422		Blank A2	0.0114			1	1	a1	0.6395		Blank A2	0.0116			1	1	a1	0.7162		1	1	a1	0.6954
Blank A3	0.015			1	1	a1	0.0151		Blank A3	0.0149			1	1	a1	0.0277		Blank A3	0.0102			1	1	a1	0.5412		Blank A3	0.0113			1	1	a1	0.6396		Blank A3	0.0114			1	1	a1	0.7168		1	1	a1	0.6955
Blank B1	0.0132			1	1	a2	0.0289		Blank B1	0.0201			1	1	a2	0.041		Blank B1	0.0115			1	1	a2	0.5722		Blank B1	0.0092			1	1	a2	0.6724		Blank B1	0.0096			1	1	a2	0.7258		1	1	a2	0.7018
Blank B2	0.0136			1	1	a2	0.0283		Blank B2	0.0199			1	1	a2	0.0408		Blank B2	0.0112			1	1	a2	0.571		Blank B2	0.0097			1	1	a2	0.6717		Blank B2	0.009			1	1	a2	0.7262		1	1	a2	0.7017
Blank B3	0.0135			1	1	a2	0.0286		Blank B3	0.0195			1	1	a2	0.0407		Blank B3	0.0119			1	1	a2	0.5708		Blank B3	0.0095			1	1	a2	0.6719		Blank B3	0.0086			1	1	a2	0.727		1	1	a2	0.7014
Blank C1	0.0093			1	1	b1	0.0249		Blank C1	0.0152			1	1	b1	0.0265		Blank C1	0.0096			1	1	b1	0.5597		Blank C1	0.0098			1	1	b1	0.5998		Blank C1	0.0114			1	1	b1	0.6608		1	1	b1	0.6504
Blank C2	0.0141			1	1	b1	0.0243		Blank C2	0.0151			1	1	b1	0.0271		Blank C2	0.01			1	1	b1	0.5595		Blank C2	0.0109			1	1	b1	0.601		Blank C2	0.0126			1	1	b1	0.66		1	1	b1	0.6507
Blank C3	0.0116			1	1	b1	0.0253		Blank C3	0.0152			1	1	b1	0.0268		Blank C3	0.0098			1	1	b1	0.5592		Blank C3	0.0107			1	1	b1	0.6007		Blank C3	0.014			1	1	b1	0.6591		1	1	b1	0.6499
Blank D1	0.0169			1	1	b2	0.0294		Blank D1	0.0175			1	1	b2	0.0547		Blank D1	0.0117			1	1	b2	0.6001		Blank D1	0.0134			1	1	b2	0.6489		Blank D1	0.0098			1	1	b2	0.6943		1	1	b2	0.6838
Blank D2	0.017			1	1	b2	0.0301		Blank D2	0.0175			1	1	b2	0.0547		Blank D2	0.0129			1	1	b2	0.5993		Blank D2	0.0136			1	1	b2	0.6493		Blank D2	0.0089			1	1	b2	0.6935		1	1	b2	0.684
Blank D3	0.0163			1	1	b2	0.0299		Blank D3	0.0167			1	1	b2	0.0545		Blank D3	0.0136			1	1	b2	0.5992		Blank D3	0.0137			1	1	b2	0.6477		Blank D3	0.0095			1	1	b2	0.6932		1	1	b2	0.6847
STD A1	1.156			1	2	a1	0.0419		STD A1	1.1862			1	2	a1	0.0112		STD A1	1.1546			1	2	a1	0.4757		STD A1	1.1506			1	2	a1	0.5586		STD A1	1.1553			1	2	a1	0.656		1	2	a1	0.6435
STD A2	1.1554			1	2	a1	0.0416		STD A2	1.1863			1	2	a1	0.0103		STD A2	1.1549			1	2	a1	0.4748		STD A2	1.151			1	2	a1	0.5581		STD A2	1.1549			1	2	a1	0.6562		1	2	a1	0.645
STD A3	1.1542			1	2	a1	0.0416		STD A3	1.1859			1	2	a1	0.0102		STD A3	1.1559			1	2	a1	0.4746		STD A3	1.1493			1	2	a1	0.5579		STD A3	1.1541			1	2	a1	0.6548		1	2	a1	0.6453
STD B1	1.127			1	2	a2	0.0458		STD B1	1.1408			1	2	a2	0.0096		STD B1	1.1262			1	2	a2	0.4929		STD B1	1.1243			1	2	a2	0.5816		STD B1	1.1306			1	2	a2	0.6665		1	2	a2	0.6702
STD B2	1.1269			1	2	a2	0.0461		STD B2	1.1428			1	2	a2	0.0098		STD B2	1.1269			1	2	a2	0.4937		STD B2	1.1225			1	2	a2	0.5825		STD B2	1.1292			1	2	a2	0.6663		1	2	a2	0.6706
STD B3	1.1253			1	2	a2	0.0458		STD B3	1.1415			1	2	a2	0.0101		STD B3	1.1272			1	2	a2	0.4941		STD B3	1.1207			1	2	a2	0.5829		STD B3	1.1296			1	2	a2	0.666		1	2	a2	0.6704
STD C1	1.1518			1	2	b1	0.0285		STD C1	1.129			1	2	b1	0.0394		STD C1	1.1256			1	2	b1	0.4727		STD C1	1.1086			1	2	b1	0.511		STD C1	1.1278			1	2	b1	0.6018		1	2	b1	0.5763
STD C2	1.1509			1	2	b1	0.0279		STD C2	1.1284			1	2	b1	0.0348		STD C2	1.127			1	2	b1	0.4727		STD C2	1.1105			1	2	b1	0.5106		STD C2	1.1242			1	2	b1	0.6017		1	2	b1	0.5753
STD C3	1.1502			1	2	b1	0.0272		STD C3	1.1294			1	2	b1	0.0401		STD C3	1.1254			1	2	b1	0.473		STD C3	1.1115			1	2	b1	0.5122		STD C3	1.1272			1	2	b1	0.6008		1	2	b1	0.5762
STD D1	1.1243			1	2	b2	0.0438		STD D1	1.1343			1	2	b2	0.063		STD D1	1.1183			1	2	b2	0.4705		STD D1	1.099			1	2	b2	0.5338		STD D1	1.1255			1	2	b2	0.5913		1	2	b2	0.59
STD D2	1.1237			1	2	b2	0.043		STD D2	1.135			1	2	b2	0.053		STD D2	1.1192			1	2	b2	0.4708		STD D2	1.0988			1	2	b2	0.5341		STD D2	1.1248			1	2	b2	0.5916		1	2	b2	0.5905
STD D3	1.1237			1	2	b2	0.043		STD D3	1.1338			1	2	b2	0.0539		STD D3	1.1167			1	2	b2	0.4703		STD D3	1.0973			1	2	b2	0.5334		STD D3	1.1236			1	2	b2	0.5914		1	2	b2	0.5906
				3	1	a1	0.1095						3	1	a1	0.1172						3	1	a1	0.5904						3	1	a1	0.6933						3	1	a1	0.7608		3	1	a1	0.7251
				3	1	a1	0.109						3	1	a1	0.1176						3	1	a1	0.5896						3	1	a1	0.694						3	1	a1	0.7608		3	1	a1	0.7241
				3	1	a1	0.1084						3	1	a1	0.1183						3	1	a1	0.5887						3	1	a1	0.6942						3	1	a1	0.7612		3	1	a1	0.7251
				3	1	a2	0.1102						3	1	a2	0.1257						3	1	a2	0.634						3	1	a2	0.7512						3	1	a2	0.7866		3	1	a2	0.7423
				3	1	a2	0.1106						3	1	a2	0.1258						3	1	a2	0.6332						3	1	a2	0.7504						3	1	a2	0.7858		3	1	a2	0.7422
				3	1	a2	0.1107						3	1	a2	0.1257						3	1	a2	0.6329						3	1	a2	0.7507						3	1	a2	0.7861		3	1	a2	0.7417
				3	1	b1	0.1129						3	1	b1	0.1305						3	1	b1	0.575						3	1	b1	0.6511						3	1	b1	0.7266		3	1	b1	0.6899
				3	1	b1	0.1125						3	1	b1	0.1307						3	1	b1	0.5749						3	1	b1	0.6504						3	1	b1	0.7263		3	1	b1	0.6907
				3	1	b1	0.1124						3	1	b1	0.1311						3	1	b1	0.5744						3	1	b1	0.65						3	1	b1	0.7254		3	1	b1	0.6906
				3	1	b2	0.1066						3	1	b2	0.1475						3	1	b2	0.6						3	1	b2	0.6896						3	1	b2	0.7646		3	1	b2	0.7347
				3	1	b2	0.1071						3	1	b2	0.1482						3	1	b2	0.5994						3	1	b2	0.6913						3	1	b2	0.7639		3	1	b2	0.7352
				3	1	b2	0.1062						3	1	b2	0.1478						3	1	b2	0.5989						3	1	b2	0.6911						3	1	b2	0.7639		3	1	b2	0.735
				3	2	a1	0.1061						3	2	a1	0.1125						3	2	a1	0.5521						3	2	a1	0.6641						3	2	a1	0.7511		3	2	a1	0.855
				3	2	a1	0.1064						3	2	a1	0.1122						3	2	a1	0.5525						3	2	a1	0.6635						3	2	a1	0.7507		3	2	a1	0.8543
				3	2	a1	0.1061						3	2	a1	0.1114						3	2	a1	0.5524						3	2	a1	0.6637						3	2	a1	0.7509		3	2	a1	0.8561
				3	2	a2	0.0932						3	2	a2	0.1083						3	2	a2	0.6099						3	2	a2	0.707						3	2	a2	0.768		3	2	a2	0.7931
				3	2	a2	0.0923						3	2	a2	0.1082						3	2	a2	0.6102						3	2	a2	0.707						3	2	a2	0.7682		3	2	a2	0.7944
				3	2	a2	0.0915						3	2	a2	0.1078						3	2	a2	0.6107						3	2	a2	0.7066						3	2	a2	0.7693		3	2	a2	0.7938
				3	2	b1	0.0756						3	2	b1	0.0942						3	2	b1	0.5077						3	2	b1	0.632						3	2	b1	0.7553		3	2	b1	0.7854
				3	2	b1	0.076						3	2	b1	0.094						3	2	b1	0.5065						3	2	b1	0.6318						3	2	b1	0.7538		3	2	b1	0.7845
				3	2	b1	0.0758						3	2	b1	0.0943						3	2	b1	0.5068						3	2	b1	0.6316						3	2	b1	0.7548		3	2	b1	0.7853
				3	2	b2	0.0969						3	2	b2	0.1563						3	2	b2	0.5323						3	2	b2	0.6599						3	2	b2	0.7919		3	2	b2	0.7936
				3	2	b2	0.0969						3	2	b2	0.1565						3	2	b2	0.5316						3	2	b2	0.6601						3	2	b2	0.7897		3	2	b2	0.7928
				3	2	b2	0.0977						3	2	b2	0.1567						3	2	b2	0.532						3	2	b2	0.6597						3	2	b2	0.7895		3	2	b2	0.7929
				4	1	a1	0.0866						4	1	a1	0.1055						4	1	a1	0.479						4	1	a1	0.5766						4	1	a1	0.6123		4	1	a1	0.5763
				4	1	a1	0.0873						4	1	a1	0.1048						4	1	a1	0.4792						4	1	a1	0.5771						4	1	a1	0.612		4	1	a1	0.5771
				4	1	a1	0.086						4	1	a1	0.1048						4	1	a1	0.4789						4	1	a1	0.5777						4	1	a1	0.6127		4	1	a1	0.5776
				4	1	a2	0.083						4	1	a2	0.0977						4	1	a2	0.5142						4	1	a2	0.6195						4	1	a2	0.629		4	1	a2	0.613
				4	1	a2	0.0837						4	1	a2	0.0975						4	1	a2	0.5144						4	1	a2	0.6198						4	1	a2	0.6289		4	1	a2	0.6128
				4	1	a2	0.084						4	1	a2	0.0977						4	1	a2	0.5138						4	1	a2	0.62						4	1	a2	0.6294		4	1	a2	0.6133
				4	1	b1	0.0933						4	1	b1	0.1092						4	1	b1	0.505						4	1	b1	0.4928						4	1	b1	0.6711		4	1	b1	0.5824
				4	1	b1	0.0933						4	1	b1	0.1093						4	1	b1	0.5056						4	1	b1	0.4922						4	1	b1	0.671		4	1	b1	0.5822
				4	1	b1	0.0932						4	1	b1	0.1099						4	1	b1	0.5051						4	1	b1	0.4926						4	1	b1	0.6719		4	1	b1	0.582
				4	1	b2	0.0736						4	1	b2	0.091						4	1	b2	0.5368						4	1	b2	0.5162						4	1	b2	0.6334		4	1	b2	0.6204
				4	1	b2	0.0742						4	1	b2	0.0909						4	1	b2	0.536						4	1	b2	0.5161						4	1	b2	0.6319		4	1	b2	0.6207
				4	1	b2	0.0742						4	1	b2	0.0912						4	1	b2	0.5355						4	1	b2	0.5169						4	1	b2	0.6326		4	1	b2	0.6199
				4	2	a1	0.0615						4	2	a1	0.0833						4	2	a1	0.5553						4	2	a1	0.5955						4	2	a1	0.6339		4	2	a1	0.624
				4	2	a1	0.0612						4	2	a1	0.083						4	2	a1	0.5554						4	2	a1	0.5953						4	2	a1	0.6342		4	2	a1	0.6243
				4	2	a1	0.0607						4	2	a1	0.0829						4	2	a1	0.5549						4	2	a1	0.596						4	2	a1	0.6337		4	2	a1	0.6241
				4	2	a2	0.078						4	2	a2	0.0835						4	2	a2	0.5794						4	2	a2	0.6104						4	2	a2	0.6734		4	2	a2	0.6624
				4	2	a2	0.077						4	2	a2	0.0842						4	2	a2	0.5787						4	2	a2	0.6103						4	2	a2	0.6731		4	2	a2	0.6622
				4	2	a2	0.077						4	2	a2	0.0837						4	2	a2	0.5788						4	2	a2	0.6097						4	2	a2	0.6721		4	2	a2	0.662
				4	2	b1	0.0914						4	2	b1	0.1093						4	2	b1	0.4939						4	2	b1	0.5217						4	2	b1	0.5309		4	2	b1	0.5515
				4	2	b1	0.0975						4	2	b1	0.1093						4	2	b1	0.4944						4	2	b1	0.5212						4	2	b1	0.5317		4	2	b1	0.5483
				4	2	b1	0.0854						4	2	b1	0.1084						4	2	b1	0.498						4	2	b1	0.5185						4	2	b1	0.5315		4	2	b1	0.5457
				4	2	b2	0.1052						4	2	b2	0.1135						4	2	b2	0.5219						4	2	b2	0.5442						4	2	b2	0.5658		4	2	b2	0.593
				4	2	b2	0.1047						4	2	b2	0.1139						4	2	b2	0.5222						4	2	b2	0.5434						4	2	b2	0.5654		4	2	b2	0.5774
				4	2	b2	0.1052						4	2	b2	0.1135						4	2	b2	0.5218						4	2	b2	0.5439						4	2	b2	0.5648		4	2	b2	0.5768
				5	1	a1	0.0915						5	1	a1	0.108						5	1	a1	0.5295						5	1	a1	0.5832						5	1	a1	0.6715		5	1	a1	0.6234
				5	1	a1	0.0926						5	1	a1	0.1081						5	1	a1	0.528						5	1	a1	0.583						5	1	a1	0.6713		5	1	a1	0.6236
				5	1	a1	0.0932						5	1	a1	0.1087						5	1	a1	0.5297						5	1	a1	0.5831						5	1	a1	0.6713		5	1	a1	0.6222
				5	1	a2	0.1121						5	1	a2	0.1401						5	1	a2	0.5413						5	1	a2	0.5997						5	1	a2	0.7		5	1	a2	0.6754
				5	1	a2	0.1119						5	1	a2	0.1399						5	1	a2	0.5438						5	1	a2	0.5992						5	1	a2	0.6989		5	1	a2	0.6772
				5	1	a2	0.1122						5	1	a2	0.1396						5	1	a2	0.5442						5	1	a2	0.5984						5	1	a2	0.6988		5	1	a2	0.677
				5	1	b1	0.1164						5	1	b1	0.1601						5	1	b1	0.5258						5	1	b1	0.5617						5	1	b1	0.5074		5	1	b1	0.6726
				5	1	b1	0.1154						5	1	b1	0.1599						5	1	b1	0.5263						5	1	b1	0.5628						5	1	b1	0.5068		5	1	b1	0.6709
				5	1	b1	0.1158						5	1	b1	0.1603						5	1	b1	0.5265						5	1	b1	0.5642						5	1	b1	0.5074		5	1	b1	0.6715
				5	1	b2	0.1085						5	1	b2	0.1231						5	1	b2	0.5694						5	1	b2	0.6568						5	1	b2	0.5439		5	1	b2	0.7022
				5	1	b2	0.1085						5	1	b2	0.1231						5	1	b2	0.569						5	1	b2	0.6537						5	1	b2	0.5431		5	1	b2	0.7038
				5	1	b2	0.1086						5	1	b2	0.1231						5	1	b2	0.5686						5	1	b2	0.6548						5	1	b2	0.5437		5	1	b2	0.7045
				5	2	a1	0.1055						5	2	a1	0.1187						5	2	a1	0.4836						5	2	a1	0.508						5	2	a1	0.5888		5	2	a1	0.6861
				5	2	a1	0.1057						5	2	a1	0.1188						5	2	a1	0.483						5	2	a1	0.5088						5	2	a1	0.5893		5	2	a1	0.6862
				5	2	a1	0.1046						5	2	a1	0.1184						5	2	a1	0.4843						5	2	a1	0.5087						5	2	a1	0.5888		5	2	a1	0.6852
				5	2	a2	0.1051						5	2	a2	0.1192						5	2	a2	0.5045						5	2	a2	0.5842						5	2	a2	0.6183		5	2	a2	0.6369
				5	2	a2	0.1042						5	2	a2	0.1197						5	2	a2	0.5041						5	2	a2	0.5837						5	2	a2	0.6194		5	2	a2	0.6372
				5	2	a2	0.1047						5	2	a2	0.1195						5	2	a2	0.5041						5	2	a2	0.584						5	2	a2	0.6192		5	2	a2	0.6379
				5	2	b1	0.1441						5	2	b1	0.152						5	2	b1	0.5108						5	2	b1	0.5557						5	2	b1	0.5963		5	2	b1	0.6133
				5	2	b1	0.1434						5	2	b1	0.1512						5	2	b1	0.5109						5	2	b1	0.5554						5	2	b1	0.5976		5	2	b1	0.6132
				5	2	b1	0.1444						5	2	b1	0.1524						5	2	b1	0.511						5	2	b1	0.5548						5	2	b1	0.5969		5	2	b1	0.6129
				5	2	b2	0.1187						5	2	b2	0.1349						5	2	b2	0.4949						5	2	b2	0.5757						5	2	b2	0.6114		5	2	b2	0.6245
				5	2	b2	0.1175						5	2	b2	0.1353						5	2	b2	0.4951						5	2	b2	0.5756						5	2	b2	0.611		5	2	b2	0.6244
				5	2	b2	0.1172						5	2	b2	0.1352						5	2	b2	0.4953						5	2	b2	0.5758						5	2	b2	0.6115		5	2	b2	0.6222
				9	1	a1	0.0334						9	1	a1	0.0395						9	1	a1	0.4637						9	1	a1	0.5264						9	1	a1	0.5641		9	1	a1	0.5439
				9	1	a1	0.0329						9	1	a1	0.039						9	1	a1	0.466						9	1	a1	0.5267						9	1	a1	0.564		9	1	a1	0.5435
				9	1	a1	0.0334						9	1	a1	0.0388						9	1	a1	0.4649						9	1	a1	0.5263						9	1	a1	0.5634		9	1	a1	0.5422
				9	1	a2	0.0334						9	1	a2	0.0515						9	1	a2	0.4987						9	1	a2	0.5408						9	1	a2	0.582		9	1	a2	0.5629
				9	1	a2	0.0345						9	1	a2	0.0513						9	1	a2	0.4987						9	1	a2	0.5407						9	1	a2	0.582		9	1	a2	0.5638
				9	1	a2	0.0348						9	1	a2	0.0513						9	1	a2	0.4999						9	1	a2	0.5408						9	1	a2	0.5814		9	1	a2	0.563
				9	1	b1	0.0315						9	1	b1	0.0403						9	1	b1	0.4465						9	1	b1	0.5243						9	1	b1	0.5741		9	1	b1	0.5772
				9	1	b1	0.0319						9	1	b1	0.0415						9	1	b1	0.4468						9	1	b1	0.5251						9	1	b1	0.5738		9	1	b1	0.5745
				9	1	b1	0.0328						9	1	b1	0.041						9	1	b1	0.4465						9	1	b1	0.5256						9	1	b1	0.5733		9	1	b1	0.5743
				9	1	b2	0.0336						9	1	b2	0.0378						9	1	b2	0.4696						9	1	b2	0.5445						9	1	b2	0.572		9	1	b2	0.5901
				9	1	b2	0.0339						9	1	b2	0.0384						9	1	b2	0.4693						9	1	b2	0.5438						9	1	b2	0.5698		9	1	b2	0.5909
				9	1	b2	0.0337						9	1	b2	0.0384						9	1	b2	0.4694						9	1	b2	0.5424						9	1	b2	0.5678		9	1	b2	0.5914
				9	2	a1	0.0284						9	2	a1	0.0329						9	2	a1	0.4712						9	2	a1	0.4611						9	2	a1	0.5172		9	2	a1	0.5463
				9	2	a1	0.0281						9	2	a1	0.033						9	2	a1	0.4708						9	2	a1	0.4598						9	2	a1	0.518		9	2	a1	0.5466
				9	2	a1	0.0289						9	2	a1	0.0329						9	2	a1	0.4706						9	2	a1	0.4607						9	2	a1	0.5188		9	2	a1	0.5453
				9	2	a2	0.0126						9	2	a2	0.0271						9	2	a2	0.4894						9	2	a2	0.4952						9	2	a2	0.5399		9	2	a2	0.5497
				9	2	a2	0.0126						9	2	a2	0.0279						9	2	a2	0.4885						9	2	a2	0.4939						9	2	a2	0.5398		9	2	a2	0.5501
				9	2	a2	0.0126						9	2	a2	0.0276						9	2	a2	0.4887						9	2	a2	0.4936						9	2	a2	0.5397		9	2	a2	0.5496
				9	2	b1	0.0122						9	2	b1	0.0289						9	2	b1	0.4682						9	2	b1	0.4788						9	2	b1	0.5339		9	2	b1	0.5603
				9	2	b1	0.0116						9	2	b1	0.0293						9	2	b1	0.4685						9	2	b1	0.4797						9	2	b1	0.5339		9	2	b1	0.5608
				9	2	b1	0.0119						9	2	b1	0.03						9	2	b1	0.4681						9	2	b1	0.4791						9	2	b1	0.533		9	2	b1	0.5615
				9	2	b2	0.0245						9	2	b2	0.0309						9	2	b2	0.4922						9	2	b2	0.498						9	2	b2	0.5462		9	2	b2	0.5852
				9	2	b2	0.0248						9	2	b2	0.0303						9	2	b2	0.4916						9	2	b2	0.4978						9	2	b2	0.5454		9	2	b2	0.5854
				9	2	b2	0.0238						9	2	b2	0.0307						9	2	b2	0.4912						9	2	b2	0.4982						9	2	b2	0.546		9	2	b2	0.5853
				12	1	a1	0.0825						12	1	a1	0.0901						12	1	a1	0.544						12	1	a1	0.6491						12	1	a1	0.756		12	1	a1	0.7654
				12	1	a1	0.0824						12	1	a1	0.0904						12	1	a1	0.5442						12	1	a1	0.6523						12	1	a1	0.7548		12	1	a1	0.7658
				12	1	a1	0.0829						12	1	a1	0.0899						12	1	a1	0.5447						12	1	a1	0.6522						12	1	a1	0.7547		12	1	a1	0.7662
				12	1	a2	0.0881						12	1	a2	0.0908						12	1	a2	0.5849						12	1	a2	0.6713						12	1	a2	0.7677		12	1	a2	0.81
				12	1	a2	0.0889						12	1	a2	0.0896						12	1	a2	0.5858						12	1	a2	0.6715						12	1	a2	0.7695		12	1	a2	0.8096
				12	1	a2	0.089						12	1	a2	0.0893						12	1	a2	0.5858						12	1	a2	0.6709						12	1	a2	0.7689		12	1	a2	0.8107
				12	1	b1	0.0639						12	1	b1	0.0755						12	1	b1	0.5777						12	1	b1	0.6598						12	1	b1	0.7405		12	1	b1	0.7564
				12	1	b1	0.0683						12	1	b1	0.0757						12	1	b1	0.5773						12	1	b1	0.6608						12	1	b1	0.7395		12	1	b1	0.7561
				12	1	b1	0.0627						12	1	b1	0.0763						12	1	b1	0.5775						12	1	b1	0.66						12	1	b1	0.7387		12	1	b1	0.7572
				12	1	b2	0.0738						12	1	b2	0.0834						12	1	b2	0.5943						12	1	b2	0.6991						12	1	b2	0.7677		12	1	b2	0.7757
				12	1	b2	0.0735						12	1	b2	0.083						12	1	b2	0.5947						12	1	b2	0.6995						12	1	b2	0.7673		12	1	b2	0.7743
				12	1	b2	0.0732						12	1	b2	0.0834						12	1	b2	0.5944						12	1	b2	0.6997						12	1	b2	0.7666		12	1	b2	0.7736
				12	2	a1	0.0633						12	2	a1	0.0795						12	2	a1	0.5297						12	2	a1	0.5382						12	2	a1	0.6234		12	2	a1	0.6739
				12	2	a1	0.0623						12	2	a1	0.0789						12	2	a1	0.5288						12	2	a1	0.5369						12	2	a1	0.6239		12	2	a1	0.6733
				12	2	a1	0.0625						12	2	a1	0.0788						12	2	a1	0.5287						12	2	a1	0.5369						12	2	a1	0.6234		12	2	a1	0.6736
				12	2	a2	0.0786						12	2	a2	0.0814						12	2	a2	0.5481						12	2	a2	0.5467						12	2	a2	0.6472		12	2	a2	0.6825
				12	2	a2	0.0789						12	2	a2	0.0811						12	2	a2	0.548						12	2	a2	0.5476						12	2	a2	0.6488		12	2	a2	0.6816
				12	2	a2	0.0792						12	2	a2	0.0806						12	2	a2	0.5481						12	2	a2	0.5486						12	2	a2	0.649		12	2	a2	0.6815
				12	2	b1	0.0798						12	2	b1	0.0874						12	2	b1	0.5596						12	2	b1	0.5638						12	2	b1	0.6104		12	2	b1	0.689
				12	2	b1	0.08						12	2	b1	0.0875						12	2	b1	0.5597						12	2	b1	0.563						12	2	b1	0.6109		12	2	b1	0.6885
				12	2	b1	0.0797						12	2	b1	0.0875						12	2	b1	0.5593						12	2	b1	0.5636						12	2	b1	0.6105		12	2	b1	0.6883
				12	2	b2	0.0642						12	2	b2	0.0829						12	2	b2	0.5826						12	2	b2	0.6131						12	2	b2	0.6438		12	2	b2	0.7132
				12	2	b2	0.0636						12	2	b2	0.083						12	2	b2	0.5818						12	2	b2	0.6121						12	2	b2	0.6436		12	2	b2	0.7121
				12	2	b2	0.0644						12	2	b2	0.0828						12	2	b2	0.584						12	2	b2	0.6122						12	2	b2	0.644		12	2	b2	0.7124
				18	1	a1	0.1034						18	1	a1	0.1164						18	1	a1	0.5501						18	1	a1	0.651						18	1	a1	0.7121		18	1	a1	0.7679
				18	1	a1	0.1032						18	1	a1	0.1167						18	1	a1	0.5507						18	1	a1	0.6509						18	1	a1	0.7119		18	1	a1	0.7679
				18	1	a1	0.1032						18	1	a1	0.1161						18	1	a1	0.5502						18	1	a1	0.6511						18	1	a1	0.7134		18	1	a1	0.7681
				18	1	a2	0.1039						18	1	a2	0.1228						18	1	a2	0.5839						18	1	a2	0.6834						18	1	a2	0.7651		18	1	a2	0.8457
				18	1	a2	0.1029						18	1	a2	0.1231						18	1	a2	0.5836						18	1	a2	0.6841						18	1	a2	0.7669		18	1	a2	0.8484
				18	1	a2	0.1025						18	1	a2	0.123						18	1	a2	0.5826						18	1	a2	0.6839						18	1	a2	0.7655		18	1	a2	0.8462
				18	1	b1	0.0566						18	1	b1	0.0684						18	1	b1	0.5826						18	1	b1	0.6812						18	1	b1	0.7398		18	1	b1	0.7481
				18	1	b1	0.0562						18	1	b1	0.0679						18	1	b1	0.5802						18	1	b1	0.6818						18	1	b1	0.7397		18	1	b1	0.7467
				18	1	b1	0.0569						18	1	b1	0.0688						18	1	b1	0.5806						18	1	b1	0.6806						18	1	b1	0.7386		18	1	b1	0.7463
				18	1	b2	0.055						18	1	b2	0.0664						18	1	b2	0.6151						18	1	b2	0.7166						18	1	b2	0.7615		18	1	b2	0.7731
				18	1	b2	0.055						18	1	b2	0.0664						18	1	b2	0.6156						18	1	b2	0.7166						18	1	b2	0.7624		18	1	b2	0.7739
				18	1	b2	0.059						18	1	b2	0.0665						18	1	b2	0.6157						18	1	b2	0.7166						18	1	b2	0.7619		18	1	b2	0.7733
				18	2	a1	0.0905						18	2	a1	0.103						18	2	a1	0.5567						18	2	a1	0.6132						18	2	a1	0.625		18	2	a1	0.7007
				18	2	a1	0.0893						18	2	a1	0.103						18	2	a1	0.5557						18	2	a1	0.6149						18	2	a1	0.6254		18	2	a1	0.6999
				18	2	a1	0.0898						18	2	a1	0.1041						18	2	a1	0.5565						18	2	a1	0.6144						18	2	a1	0.6252		18	2	a1	0.7007
				18	2	a2	0.0902						18	2	a2	0.1091						18	2	a2	0.5632						18	2	a2	0.6338						18	2	a2	0.65		18	2	a2	0.7215
				18	2	a2	0.09						18	2	a2	0.1099						18	2	a2	0.5635						18	2	a2	0.6339						18	2	a2	0.6509		18	2	a2	0.7201
				18	2	a2	0.0899						18	2	a2	0.1086						18	2	a2	0.563						18	2	a2	0.6335						18	2	a2	0.6506		18	2	a2	0.7203
				18	2	b1	0.1178						18	2	b1	0.137						18	2	b1	0.5677						18	2	b1	0.6333						18	2	b1	0.6933		18	2	b1	0.7097
				18	2	b1	0.1183						18	2	b1	0.1367						18	2	b1	0.568						18	2	b1	0.6322						18	2	b1	0.6912		18	2	b1	0.7084
				18	2	b1	0.1181						18	2	b1	0.1369						18	2	b1	0.5696						18	2	b1	0.6323						18	2	b1	0.6879		18	2	b1	0.7082
				18	2	b2	0.1155						18	2	b2	0.1349						18	2	b2	0.6409						18	2	b2	0.6675						18	2	b2	0.7111		18	2	b2	0.7514
				18	2	b2	0.1148						18	2	b2	0.1341						18	2	b2	0.6416						18	2	b2	0.6676						18	2	b2	0.7118		18	2	b2	0.7507
				18	2	b2	0.1144						18	2	b2	0.1344						18	2	b2	0.6422						18	2	b2	0.6675						18	2	b2	0.7112		18	2	b2	0.7506
				Blank1	1	a1	0.0213						Blank1	1	a1	0.0163						Blank1	1	a1	0.1339						Blank1	1	a1	0.1466						Blank1	1	a1	0.1542		Blank1	1	a1	0.1407
				Blank1	1	a1	0.0217						Blank1	1	a1	0.0157						Blank1	1	a1	0.1337						Blank1	1	a1	0.1466						Blank1	1	a1	0.1544		Blank1	1	a1	0.141
				Blank1	1	a1	0.021						Blank1	1	a1	0.016						Blank1	1	a1	0.1344						Blank1	1	a1	0.1465						Blank1	1	a1	0.154		Blank1	1	a1	0.1416
				Blank1	1	a2	0.0299						Blank1	1	a2	0.0188						Blank1	1	a2	0.1473						Blank1	1	a2	0.1409						Blank1	1	a2	0.1497		Blank1	1	a2	0.1472
				Blank1	1	a2	0.0299						Blank1	1	a2	0.0178						Blank1	1	a2	0.1472						Blank1	1	a2	0.1422						Blank1	1	a2	0.1509		Blank1	1	a2	0.147
				Blank1	1	a2	0.0293						Blank1	1	a2	0.0174						Blank1	1	a2	0.1475						Blank1	1	a2	0.1418						Blank1	1	a2	0.1503		Blank1	1	a2	0.1478
				Blank1	1	b1	0.0209						Blank1	1	b1	0.0169						Blank1	1	b1	0.137						Blank1	1	b1	0.1411						Blank1	1	b1	0.1455		Blank1	1	b1	0.1546
				Blank1	1	b1	0.0205						Blank1	1	b1	0.017						Blank1	1	b1	0.1366						Blank1	1	b1	0.1418						Blank1	1	b1	0.1447		Blank1	1	b1	0.1549
				Blank1	1	b1	0.0199						Blank1	1	b1	0.0169						Blank1	1	b1	0.1361						Blank1	1	b1	0.1419						Blank1	1	b1	0.1441		Blank1	1	b1	0.155
				Blank1	1	b2	0.0233						Blank1	1	b2	0.021						Blank1	1	b2	0.1425						Blank1	1	b2	0.1534						Blank1	1	b2	0.152		Blank1	1	b2	0.1487
				Blank1	1	b2	0.0231						Blank1	1	b2	0.0206						Blank1	1	b2	0.1433						Blank1	1	b2	0.1529						Blank1	1	b2	0.1519		Blank1	1	b2	0.1489
				Blank1	1	b2	0.0242						Blank1	1	b2	0.0198						Blank1	1	b2	0.1423						Blank1	1	b2	0.1526						Blank1	1	b2	0.1517		Blank1	1	b2	0.1489
				Blank2	1	a1	0.0194						Blank2	1	a1	0.0108						Blank2	1	a1	0.1356						Blank2	1	a1	0.1423						Blank2	1	a1	0.1379		Blank2	1	a1	0.1448
				Blank2	1	a1	0.0196						Blank2	1	a1	0.0106						Blank2	1	a1	0.1353						Blank2	1	a1	0.1431						Blank2	1	a1	0.1389		Blank2	1	a1	0.1454
				Blank2	1	a1	0.0193						Blank2	1	a1	0.0107						Blank2	1	a1	0.1347						Blank2	1	a1	0.143						Blank2	1	a1	0.1386		Blank2	1	a1	0.1455
				Blank2	1	a2	0.0161						Blank2	1	a2	0.0166						Blank2	1	a2	0.143						Blank2	1	a2	0.1392						Blank2	1	a2	0.1461		Blank2	1	a2	0.1554
				Blank2	1	a2	0.0161						Blank2	1	a2	0.0165						Blank2	1	a2	0.1435						Blank2	1	a2	0.1389						Blank2	1	a2	0.1451		Blank2	1	a2	0.1547
				Blank2	1	a2	0.016						Blank2	1	a2	0.0169						Blank2	1	a2	0.1434						Blank2	1	a2	0.1386						Blank2	1	a2	0.1446		Blank2	1	a2	0.1552
				Blank2	1	b1	0.0221						Blank2	1	b1	0.0135						Blank2	1	b1	0.1433						Blank2	1	b1	0.1365						Blank2	1	b1	0.1468		Blank2	1	b1	0.1508
				Blank2	1	b1	0.0213						Blank2	1	b1	0.0127						Blank2	1	b1	0.1429						Blank2	1	b1	0.1367						Blank2	1	b1	0.1468		Blank2	1	b1	0.1519
				Blank2	1	b1	0.0212						Blank2	1	b1	0.0129						Blank2	1	b1	0.1427						Blank2	1	b1	0.1369						Blank2	1	b1	0.1461		Blank2	1	b1	0.1521
				Blank2	1	b2	0.034						Blank2	1	b2	0.0157						Blank2	1	b2	0.1494						Blank2	1	b2	0.1455						Blank2	1	b2	0.1521		Blank2	1	b2	0.1451
				Blank2	1	b2	0.0348						Blank2	1	b2	0.0152						Blank2	1	b2	0.1493						Blank2	1	b2	0.1451						Blank2	1	b2	0.1516		Blank2	1	b2	0.1452
				Blank2	1	b2	0.0342						Blank2	1	b2	0.0159						Blank2	1	b2	0.1496						Blank2	1	b2	0.1453						Blank2	1	b2	0.1507		Blank2	1	b2	0.1456
				Blank3	1	a1	0.0263						Blank3	1	a1	0.0192						Blank3	1	a1	0.1426						Blank3	1	a1	0.141						Blank3	1	a1	0.1506		Blank3	1	a1	0.144
				Blank3	1	a1	0.0267						Blank3	1	a1	0.0192						Blank3	1	a1	0.1421						Blank3	1	a1	0.141						Blank3	1	a1	0.1505		Blank3	1	a1	0.1436
				Blank3	1	a1	0.0267						Blank3	1	a1	0.0189						Blank3	1	a1	0.1422						Blank3	1	a1	0.1417						Blank3	1	a1	0.15		Blank3	1	a1	0.1438
				Blank3	1	a2	0.035						Blank3	1	a2	0.0187						Blank3	1	a2	0.1515						Blank3	1	a2	0.1475						Blank3	1	a2	0.1463		Blank3	1	a2	0.1506
				Blank3	1	a2	0.0363						Blank3	1	a2	0.0187						Blank3	1	a2	0.1523						Blank3	1	a2	0.1471						Blank3	1	a2	0.1462		Blank3	1	a2	0.1513
				Blank3	1	a2	0.0368						Blank3	1	a2	0.0193						Blank3	1	a2	0.1516						Blank3	1	a2	0.1474						Blank3	1	a2	0.1453		Blank3	1	a2	0.1515
				Blank3	1	b1	0.0301						Blank3	1	b1	0.0149						Blank3	1	b1	0.1455						Blank3	1	b1	0.1461						Blank3	1	b1	0.1406		Blank3	1	b1	0.1339
				Blank3	1	b1	0.0298						Blank3	1	b1	0.0157						Blank3	1	b1	0.1458						Blank3	1	b1	0.1459						Blank3	1	b1	0.1401		Blank3	1	b1	0.134
				Blank3	1	b1	0.0299						Blank3	1	b1	0.0157						Blank3	1	b1	0.1468						Blank3	1	b1	0.1451						Blank3	1	b1	0.1401		Blank3	1	b1	0.1338
				Blank3	1	b2	0.0204						Blank3	1	b2	0.0134						Blank3	1	b2	0.1485						Blank3	1	b2	0.149						Blank3	1	b2	0.1446		Blank3	1	b2	0.1462
				Blank3	1	b2	0.021						Blank3	1	b2	0.0129						Blank3	1	b2	0.1479						Blank3	1	b2	0.1496						Blank3	1	b2	0.1434		Blank3	1	b2	0.1458
				Blank3	1	b2	0.0208						Blank3	1	b2	0.0132						Blank3	1	b2	0.1472						Blank3	1	b2	0.1498						Blank3	1	b2	0.1442		Blank3	1	b2	0.1457

## Sheet: Gopod S1
sample ID	Sampling	Batch	replication	Sample weight (g)	A510 blank	A510 sample	Asample-Ablank	Acontrol	Asample-Acontrol (ΔA)	A510 glucose STD	F (100µg glucose/A STD)	Extraction volume (mL)	Volume analized (mL)	Extraction V/Analized V	Dilutions	Sample weight (mg)	100/sample weight	162/180	dig. starch %	wet tot. starch %	dig/tot %		g/100g total starch
F1	1	1	a1	5.09	0.0142583	0.0148	0.000541667			1.13912	87.7873	25	0.1	250	30	5090	0.0196464	0.9	11.6417	61.2394	0.190102		Sampling 1	Mean	SD
F1	1	1	a1	5.09	0.0142583	0.0145	0.000241667			1.13912	87.7873	25	0.1	250	30	5090	0.0196464	0.9	11.6417	61.2394	0.190102		1	0.191518	0.000960846				S1	starch dig
F1	1	1	a1	5.09	0.0142583	0.0151	0.000841667			1.13912	87.7873	25	0.1	250	30	5090	0.0196464	0.9	11.6417	61.2394	0.190102		3	0.203754	0.000461259				F1	0.190102
F1	1	1	a2	5.09	0.0142583	0.0289	0.0146417			1.13912	87.7873	25	0.1	250	30	5090	0.0196464	0.9	11.6417	61.2394	0.190102		4	0.204299	0.000462491				F1	0.190102
F1	1	1	a2	5.09	0.0142583	0.0283	0.0140417			1.13912	87.7873	25	0.1	250	30	5090	0.0196464	0.9	11.6417	61.2394	0.190102		5	0.18614	0.000555356				F1	0.190102
F1	1	1	a2	5.09	0.0142583	0.0286	0.0143417			1.13912	87.7873	25	0.1	250	30	5090	0.0196464	0.9	11.6417	61.2394	0.190102		9	0.247174	0.0011419				F1	0.190102
F1	1	1	b1	5.06	0.0142583	0.0249	0.0106417			1.13912	87.7873	25	0.1	250	30	5060	0.0197628	0.9	11.7108	61.2394	0.191229		12	0.243235	0.000887881				F1	0.190102
F1	1	1	b1	5.06	0.0142583	0.0243	0.0100417			1.13912	87.7873	25	0.1	250	30	5060	0.0197628	0.9	11.7108	61.2394	0.191229		18	0.217449	0.000657396				F1	0.190102
F1	1	1	b1	5.06	0.0142583	0.0253	0.0110417			1.13912	87.7873	25	0.1	250	30	5060	0.0197628	0.9	11.7108	61.2394	0.191229								F1	0.191229
F1	1	1	b2	5.06	0.0142583	0.0294	0.0151417			1.13912	87.7873	25	0.1	250	30	5060	0.0197628	0.9	11.7108	61.2394	0.191229								F1	0.191229
F1	1	1	b2	5.06	0.0142583	0.0301	0.0158417			1.13912	87.7873	25	0.1	250	30	5060	0.0197628	0.9	11.7108	61.2394	0.191229		g/100g porridge						F1	0.191229
F1	1	1	b2	5.06	0.0142583	0.0299	0.0156417			1.13912	87.7873	25	0.1	250	30	5060	0.0197628	0.9	11.7108	61.2394	0.191229		Sampling 1	Mean	SD				F1	0.191229
F1	1	2	a1	5.03	0.0142583	0.0419	0.0276417			1.13912	87.7873	25	0.1	250	30	5030	0.0198807	0.9	11.7806	61.2394	0.19237		1	11.7284	0.0588417				F1	0.191229
F1	1	2	a1	5.03	0.0142583	0.0416	0.0273417			1.13912	87.7873	25	0.1	250	30	5030	0.0198807	0.9	11.7806	61.2394	0.19237		3	11.7456	0.0265897				F1	0.191229
F1	1	2	a1	5.03	0.0142583	0.0416	0.0273417			1.13912	87.7873	25	0.1	250	30	5030	0.0198807	0.9	11.7806	61.2394	0.19237		4	11.7456	0.0265897				F1	0.19237
F1	1	2	a2	5.03	0.0142583	0.0458	0.0315417			1.13912	87.7873	25	0.1	250	30	5030	0.0198807	0.9	11.7806	61.2394	0.19237		5	11.7166	0.0349571				F1	0.19237
F1	1	2	a2	5.03	0.0142583	0.0461	0.0318417			1.13912	87.7873	25	0.1	250	30	5030	0.0198807	0.9	11.7806	61.2394	0.19237		9	11.7226	0.0541564				F1	0.19237
F1	1	2	a2	5.03	0.0142583	0.0458	0.0315417			1.13912	87.7873	25	0.1	250	30	5030	0.0198807	0.9	11.7806	61.2394	0.19237		12	11.7457	0.0428755				F1	0.19237
F1	1	2	b1	5.03	0.0142583	0.0285	0.0142417			1.13912	87.7873	25	0.1	250	30	5030	0.0198807	0.9	11.7806	61.2394	0.19237		18	11.7224	0.0354396				F1	0.19237
F1	1	2	b1	5.03	0.0142583	0.0279	0.0136417			1.13912	87.7873	25	0.1	250	30	5030	0.0198807	0.9	11.7806	61.2394	0.19237								F1	0.19237
F1	1	2	b1	5.03	0.0142583	0.0272	0.0129417			1.13912	87.7873	25	0.1	250	30	5030	0.0198807	0.9	11.7806	61.2394	0.19237								F1	0.19237
F1	1	2	b2	5.03	0.0142583	0.0438	0.0295417			1.13912	87.7873	25	0.1	250	30	5030	0.0198807	0.9	11.7806	61.2394	0.19237								F1	0.19237
F1	1	2	b2	5.03	0.0142583	0.043	0.0287417			1.13912	87.7873	25	0.1	250	30	5030	0.0198807	0.9	11.7806	61.2394	0.19237								F1	0.19237
F1	1	2	b2	5.03	0.0142583	0.043	0.0287417			1.13912	87.7873	25	0.1	250	30	5030	0.0198807	0.9	11.7806	61.2394	0.19237								F1	0.19237
F3	1	1	a1	5.04	0.0142583	0.1095	0.0952417			1.13912	87.7873	25	0.1	250	30	5040	0.0198413	0.9	11.7572	57.6461	0.203956								F1	0.19237
F3	1	1	a1	5.04	0.0142583	0.109	0.0947417			1.13912	87.7873	25	0.1	250	30	5040	0.0198413	0.9	11.7572	57.6461	0.203956								F1	0.19237
F3	1	1	a1	5.04	0.0142583	0.1084	0.0941417			1.13912	87.7873	25	0.1	250	30	5040	0.0198413	0.9	11.7572	57.6461	0.203956								F3	0.203956
F3	1	1	a2	5.04	0.0142583	0.1102	0.0959417			1.13912	87.7873	25	0.1	250	30	5040	0.0198413	0.9	11.7572	57.6461	0.203956								F3	0.203956
F3	1	1	a2	5.04	0.0142583	0.1106	0.0963417			1.13912	87.7873	25	0.1	250	30	5040	0.0198413	0.9	11.7572	57.6461	0.203956								F3	0.203956
F3	1	1	a2	5.04	0.0142583	0.1107	0.0964417			1.13912	87.7873	25	0.1	250	30	5040	0.0198413	0.9	11.7572	57.6461	0.203956								F3	0.203956
F3	1	1	b1	5.03	0.0142583	0.1129	0.0986417			1.13912	87.7873	25	0.1	250	30	5030	0.0198807	0.9	11.7806	57.6461	0.204361								F3	0.203956
F3	1	1	b1	5.03	0.0142583	0.1125	0.0982417			1.13912	87.7873	25	0.1	250	30	5030	0.0198807	0.9	11.7806	57.6461	0.204361								F3	0.203956
F3	1	1	b1	5.03	0.0142583	0.1124	0.0981417			1.13912	87.7873	25	0.1	250	30	5030	0.0198807	0.9	11.7806	57.6461	0.204361								F3	0.204361
F3	1	1	b2	5.03	0.0142583	0.1066	0.0923417			1.13912	87.7873	25	0.1	250	30	5030	0.0198807	0.9	11.7806	57.6461	0.204361								F3	0.204361
F3	1	1	b2	5.03	0.0142583	0.1071	0.0928417			1.13912	87.7873	25	0.1	250	30	5030	0.0198807	0.9	11.7806	57.6461	0.204361								F3	0.204361
F3	1	1	b2	5.03	0.0142583	0.1062	0.0919417			1.13912	87.7873	25	0.1	250	30	5030	0.0198807	0.9	11.7806	57.6461	0.204361								F3	0.204361
F3	1	2	a1	5.06	0.0142583	0.1061	0.0918417			1.13912	87.7873	25	0.1	250	30	5060	0.0197628	0.9	11.7108	57.6461	0.203149								F3	0.204361
F3	1	2	a1	5.06	0.0142583	0.1064	0.0921417			1.13912	87.7873	25	0.1	250	30	5060	0.0197628	0.9	11.7108	57.6461	0.203149								F3	0.204361
F3	1	2	a1	5.06	0.0142583	0.1061	0.0918417			1.13912	87.7873	25	0.1	250	30	5060	0.0197628	0.9	11.7108	57.6461	0.203149								F3	0.203149
F3	1	2	a2	5.06	0.0142583	0.0932	0.0789417			1.13912	87.7873	25	0.1	250	30	5060	0.0197628	0.9	11.7108	57.6461	0.203149								F3	0.203149
F3	1	2	a2	5.06	0.0142583	0.0923	0.0780417			1.13912	87.7873	25	0.1	250	30	5060	0.0197628	0.9	11.7108	57.6461	0.203149								F3	0.203149
F3	1	2	a2	5.06	0.0142583	0.0915	0.0772417			1.13912	87.7873	25	0.1	250	30	5060	0.0197628	0.9	11.7108	57.6461	0.203149								F3	0.203149
F3	1	2	b1	5.05	0.0142583	0.0756	0.0613417			1.13912	87.7873	25	0.1	250	30	5050	0.019802	0.9	11.7339	57.6461	0.203552								F3	0.203149
F3	1	2	b1	5.05	0.0142583	0.076	0.0617417			1.13912	87.7873	25	0.1	250	30	5050	0.019802	0.9	11.7339	57.6461	0.203552								F3	0.203149
F3	1	2	b1	5.05	0.0142583	0.0758	0.0615417			1.13912	87.7873	25	0.1	250	30	5050	0.019802	0.9	11.7339	57.6461	0.203552								F3	0.203552
F3	1	2	b2	5.05	0.0142583	0.0969	0.0826417			1.13912	87.7873	25	0.1	250	30	5050	0.019802	0.9	11.7339	57.6461	0.203552								F3	0.203552
F3	1	2	b2	5.05	0.0142583	0.0969	0.0826417			1.13912	87.7873	25	0.1	250	30	5050	0.019802	0.9	11.7339	57.6461	0.203552								F3	0.203552
F3	1	2	b2	5.05	0.0142583	0.0977	0.0834417			1.13912	87.7873	25	0.1	250	30	5050	0.019802	0.9	11.7339	57.6461	0.203552								F3	0.203552
F4	1	1	a1	5.05	0.0142583	0.0866	0.0723417			1.13912	87.7873	25	0.1	250	30	5050	0.019802	0.9	11.7339	57.4925	0.204095								F3	0.203552
F4	1	1	a1	5.05	0.0142583	0.0873	0.0730417			1.13912	87.7873	25	0.1	250	30	5050	0.019802	0.9	11.7339	57.4925	0.204095								F3	0.203552
F4	1	1	a1	5.05	0.0142583	0.086	0.0717417			1.13912	87.7873	25	0.1	250	30	5050	0.019802	0.9	11.7339	57.4925	0.204095								F4	0.204095
F4	1	1	a2	5.05	0.0142583	0.083	0.0687417			1.13912	87.7873	25	0.1	250	30	5050	0.019802	0.9	11.7339	57.4925	0.204095								F4	0.204095
F4	1	1	a2	5.05	0.0142583	0.0837	0.0694417			1.13912	87.7873	25	0.1	250	30	5050	0.019802	0.9	11.7339	57.4925	0.204095								F4	0.204095
F4	1	1	a2	5.05	0.0142583	0.084	0.0697417			1.13912	87.7873	25	0.1	250	30	5050	0.019802	0.9	11.7339	57.4925	0.204095								F4	0.204095
F4	1	1	b1	5.04	0.0142583	0.0933	0.0790417			1.13912	87.7873	25	0.1	250	30	5040	0.0198413	0.9	11.7572	57.4925	0.2045								F4	0.204095
F4	1	1	b1	5.04	0.0142583	0.0933	0.0790417			1.13912	87.7873	25	0.1	250	30	5040	0.0198413	0.9	11.7572	57.4925	0.2045								F4	0.204095
F4	1	1	b1	5.04	0.0142583	0.0932	0.0789417			1.13912	87.7873	25	0.1	250	30	5040	0.0198413	0.9	11.7572	57.4925	0.2045								F4	0.2045
F4	1	1	b2	5.04	0.0142583	0.0736	0.0593417			1.13912	87.7873	25	0.1	250	30	5040	0.0198413	0.9	11.7572	57.4925	0.2045								F4	0.2045
F4	1	1	b2	5.04	0.0142583	0.0742	0.0599417			1.13912	87.7873	25	0.1	250	30	5040	0.0198413	0.9	11.7572	57.4925	0.2045								F4	0.2045
F4	1	1	b2	5.04	0.0142583	0.0742	0.0599417			1.13912	87.7873	25	0.1	250	30	5040	0.0198413	0.9	11.7572	57.4925	0.2045								F4	0.2045
F4	1	2	a1	5.06	0.0142583	0.0615	0.0472417			1.13912	87.7873	25	0.1	250	30	5060	0.0197628	0.9	11.7108	57.4925	0.203692								F4	0.2045
F4	1	2	a1	5.06	0.0142583	0.0612	0.0469417			1.13912	87.7873	25	0.1	250	30	5060	0.0197628	0.9	11.7108	57.4925	0.203692								F4	0.2045
F4	1	2	a1	5.06	0.0142583	0.0607	0.0464417			1.13912	87.7873	25	0.1	250	30	5060	0.0197628	0.9	11.7108	57.4925	0.203692								F4	0.203692
F4	1	2	a2	5.06	0.0142583	0.078	0.0637417			1.13912	87.7873	25	0.1	250	30	5060	0.0197628	0.9	11.7108	57.4925	0.203692								F4	0.203692
F4	1	2	a2	5.06	0.0142583	0.077	0.0627417			1.13912	87.7873	25	0.1	250	30	5060	0.0197628	0.9	11.7108	57.4925	0.203692								F4	0.203692
F4	1	2	a2	5.06	0.0142583	0.077	0.0627417			1.13912	87.7873	25	0.1	250	30	5060	0.0197628	0.9	11.7108	57.4925	0.203692								F4	0.203692
F4	1	2	b1	5.03	0.0142583	0.0914	0.0771417			1.13912	87.7873	25	0.1	250	30	5030	0.0198807	0.9	11.7806	57.4925	0.204907								F4	0.203692
F4	1	2	b1	5.03	0.0142583	0.0975	0.0832417			1.13912	87.7873	25	0.1	250	30	5030	0.0198807	0.9	11.7806	57.4925	0.204907								F4	0.203692
F4	1	2	b1	5.03	0.0142583	0.0854	0.0711417			1.13912	87.7873	25	0.1	250	30	5030	0.0198807	0.9	11.7806	57.4925	0.204907								F4	0.204907
F4	1	2	b2	5.03	0.0142583	0.1052	0.0909417			1.13912	87.7873	25	0.1	250	30	5030	0.0198807	0.9	11.7806	57.4925	0.204907								F4	0.204907
F4	1	2	b2	5.03	0.0142583	0.1047	0.0904417			1.13912	87.7873	25	0.1	250	30	5030	0.0198807	0.9	11.7806	57.4925	0.204907								F4	0.204907
F4	1	2	b2	5.03	0.0142583	0.1052	0.0909417			1.13912	87.7873	25	0.1	250	30	5030	0.0198807	0.9	11.7806	57.4925	0.204907								F4	0.204907
F5	1	1	a1	5.04	0.0142583	0.0915	0.0772417			1.13912	87.7873	25	0.1	250	30	5040	0.0198413	0.9	11.7572	62.9454	0.186785								F4	0.204907
F5	1	1	a1	5.04	0.0142583	0.0926	0.0783417			1.13912	87.7873	25	0.1	250	30	5040	0.0198413	0.9	11.7572	62.9454	0.186785								F4	0.204907
F5	1	1	a1	5.04	0.0142583	0.0932	0.0789417			1.13912	87.7873	25	0.1	250	30	5040	0.0198413	0.9	11.7572	62.9454	0.186785								F5	0.186785
F5	1	1	a2	5.04	0.0142583	0.1121	0.0978417			1.13912	87.7873	25	0.1	250	30	5040	0.0198413	0.9	11.7572	62.9454	0.186785								F5	0.186785
F5	1	1	a2	5.04	0.0142583	0.1119	0.0976417			1.13912	87.7873	25	0.1	250	30	5040	0.0198413	0.9	11.7572	62.9454	0.186785								F5	0.186785
F5	1	1	a2	5.04	0.0142583	0.1122	0.0979417			1.13912	87.7873	25	0.1	250	30	5040	0.0198413	0.9	11.7572	62.9454	0.186785								F5	0.186785
F5	1	1	b1	5.08	0.0142583	0.1164	0.102142			1.13912	87.7873	25	0.1	250	30	5080	0.019685	0.9	11.6647	62.9454	0.185314								F5	0.186785
F5	1	1	b1	5.08	0.0142583	0.1154	0.101142			1.13912	87.7873	25	0.1	250	30	5080	0.019685	0.9	11.6647	62.9454	0.185314								F5	0.186785
F5	1	1	b1	5.08	0.0142583	0.1158	0.101542			1.13912	87.7873	25	0.1	250	30	5080	0.019685	0.9	11.6647	62.9454	0.185314								F5	0.185314
F5	1	1	b2	5.08	0.0142583	0.1085	0.0942417			1.13912	87.7873	25	0.1	250	30	5080	0.019685	0.9	11.6647	62.9454	0.185314								F5	0.185314
F5	1	1	b2	5.08	0.0142583	0.1085	0.0942417			1.13912	87.7873	25	0.1	250	30	5080	0.019685	0.9	11.6647	62.9454	0.185314								F5	0.185314
F5	1	1	b2	5.08	0.0142583	0.1086	0.0943417			1.13912	87.7873	25	0.1	250	30	5080	0.019685	0.9	11.6647	62.9454	0.185314								F5	0.185314
F5	1	2	a1	5.06	0.0142583	0.1055	0.0912417			1.13912	87.7873	25	0.1	250	30	5060	0.0197628	0.9	11.7108	62.9454	0.186046								F5	0.185314
F5	1	2	a1	5.06	0.0142583	0.1057	0.0914417			1.13912	87.7873	25	0.1	250	30	5060	0.0197628	0.9	11.7108	62.9454	0.186046								F5	0.185314
F5	1	2	a1	5.06	0.0142583	0.1046	0.0903417			1.13912	87.7873	25	0.1	250	30	5060	0.0197628	0.9	11.7108	62.9454	0.186046								F5	0.186046
F5	1	2	a2	5.06	0.0142583	0.1051	0.0908417			1.13912	87.7873	25	0.1	250	30	5060	0.0197628	0.9	11.7108	62.9454	0.186046								F5	0.186046
F5	1	2	a2	5.06	0.0142583	0.1042	0.0899417			1.13912	87.7873	25	0.1	250	30	5060	0.0197628	0.9	11.7108	62.9454	0.186046								F5	0.186046
F5	1	2	a2	5.06	0.0142583	0.1047	0.0904417			1.13912	87.7873	25	0.1	250	30	5060	0.0197628	0.9	11.7108	62.9454	0.186046								F5	0.186046
F5	1	2	b1	5.05	0.0142583	0.1441	0.129842			1.13912	87.7873	25	0.1	250	30	5050	0.019802	0.9	11.7339	62.9454	0.186415								F5	0.186046
F5	1	2	b1	5.05	0.0142583	0.1434	0.129142			1.13912	87.7873	25	0.1	250	30	5050	0.019802	0.9	11.7339	62.9454	0.186415								F5	0.186046
F5	1	2	b1	5.05	0.0142583	0.1444	0.130142			1.13912	87.7873	25	0.1	250	30	5050	0.019802	0.9	11.7339	62.9454	0.186415								F5	0.186415
F5	1	2	b2	5.05	0.0142583	0.1187	0.104442			1.13912	87.7873	25	0.1	250	30	5050	0.019802	0.9	11.7339	62.9454	0.186415								F5	0.186415
F5	1	2	b2	5.05	0.0142583	0.1175	0.103242			1.13912	87.7873	25	0.1	250	30	5050	0.019802	0.9	11.7339	62.9454	0.186415								F5	0.186415
F5	1	2	b2	5.05	0.0142583	0.1172	0.102942			1.13912	87.7873	25	0.1	250	30	5050	0.019802	0.9	11.7339	62.9454	0.186415								F5	0.186415
F9	1	1	a1	5.03	0.0142583	0.0334	0.0191417			1.13912	87.7873	25	0.1	250	30	5030	0.0198807	0.9	11.7806	47.4264	0.248398								F5	0.186415
F9	1	1	a1	5.03	0.0142583	0.0329	0.0186417			1.13912	87.7873	25	0.1	250	30	5030	0.0198807	0.9	11.7806	47.4264	0.248398								F5	0.186415
F9	1	1	a1	5.03	0.0142583	0.0334	0.0191417			1.13912	87.7873	25	0.1	250	30	5030	0.0198807	0.9	11.7806	47.4264	0.248398
F9	1	1	a2	5.03	0.0142583	0.0334	0.0191417			1.13912	87.7873	25	0.1	250	30	5030	0.0198807	0.9	11.7806	47.4264	0.248398
F9	1	1	a2	5.03	0.0142583	0.0345	0.0202417			1.13912	87.7873	25	0.1	250	30	5030	0.0198807	0.9	11.7806	47.4264	0.248398
F9	1	1	a2	5.03	0.0142583	0.0348	0.0205417			1.13912	87.7873	25	0.1	250	30	5030	0.0198807	0.9	11.7806	47.4264	0.248398
F9	1	1	b1	5.04	0.0142583	0.0315	0.0172417			1.13912	87.7873	25	0.1	250	30	5040	0.0198413	0.9	11.7572	47.4264	0.247905
F9	1	1	b1	5.04	0.0142583	0.0319	0.0176417			1.13912	87.7873	25	0.1	250	30	5040	0.0198413	0.9	11.7572	47.4264	0.247905
F9	1	1	b1	5.04	0.0142583	0.0328	0.0185417			1.13912	87.7873	25	0.1	250	30	5040	0.0198413	0.9	11.7572	47.4264	0.247905
F9	1	1	b2	5.04	0.0142583	0.0336	0.0193417			1.13912	87.7873	25	0.1	250	30	5040	0.0198413	0.9	11.7572	47.4264	0.247905
F9	1	1	b2	5.04	0.0142583	0.0339	0.0196417			1.13912	87.7873	25	0.1	250	30	5040	0.0198413	0.9	11.7572	47.4264	0.247905
F9	1	1	b2	5.04	0.0142583	0.0337	0.0194417			1.13912	87.7873	25	0.1	250	30	5040	0.0198413	0.9	11.7572	47.4264	0.247905
F9	1	2	a1	5.06	0.0142583	0.0284	0.0141417			1.13912	87.7873	25	0.1	250	30	5060	0.0197628	0.9	11.7108	47.4264	0.246925
F9	1	2	a1	5.06	0.0142583	0.0281	0.0138417			1.13912	87.7873	25	0.1	250	30	5060	0.0197628	0.9	11.7108	47.4264	0.246925
F9	1	2	a1	5.06	0.0142583	0.0289	0.0146417			1.13912	87.7873	25	0.1	250	30	5060	0.0197628	0.9	11.7108	47.4264	0.246925
F9	1	2	a2	5.06	0.0142583	0.0126	-0.00165833			1.13912	87.7873	25	0.1	250	30	5060	0.0197628	0.9	11.7108	47.4264	0.246925
F9	1	2	a2	5.06	0.0142583	0.0126	-0.00165833			1.13912	87.7873	25	0.1	250	30	5060	0.0197628	0.9	11.7108	47.4264	0.246925
F9	1	2	a2	5.06	0.0142583	0.0126	-0.00165833			1.13912	87.7873	25	0.1	250	30	5060	0.0197628	0.9	11.7108	47.4264	0.246925
F9	1	2	b1	5.09	0.0142583	0.0122	-0.00205833			1.13912	87.7873	25	0.1	250	30	5090	0.0196464	0.9	11.6417	47.4264	0.24547
F9	1	2	b1	5.09	0.0142583	0.0116	-0.00265833			1.13912	87.7873	25	0.1	250	30	5090	0.0196464	0.9	11.6417	47.4264	0.24547
F9	1	2	b1	5.09	0.0142583	0.0119	-0.00235833			1.13912	87.7873	25	0.1	250	30	5090	0.0196464	0.9	11.6417	47.4264	0.24547
F9	1	2	b2	5.09	0.0142583	0.0245	0.0102417			1.13912	87.7873	25	0.1	250	30	5090	0.0196464	0.9	11.6417	47.4264	0.24547
F9	1	2	b2	5.09	0.0142583	0.0248	0.0105417			1.13912	87.7873	25	0.1	250	30	5090	0.0196464	0.9	11.6417	47.4264	0.24547
F9	1	2	b2	5.09	0.0142583	0.0238	0.00954167			1.13912	87.7873	25	0.1	250	30	5090	0.0196464	0.9	11.6417	47.4264	0.24547
F12	1	1	a1	5.02	0.0142583	0.0825	0.0682417			1.13912	87.7873	25	0.1	250	30	5020	0.0199203	0.9	11.8041	48.2897	0.244443
F12	1	1	a1	5.02	0.0142583	0.0824	0.0681417			1.13912	87.7873	25	0.1	250	30	5020	0.0199203	0.9	11.8041	48.2897	0.244443
F12	1	1	a1	5.02	0.0142583	0.0829	0.0686417			1.13912	87.7873	25	0.1	250	30	5020	0.0199203	0.9	11.8041	48.2897	0.244443
F12	1	1	a2	5.02	0.0142583	0.0881	0.0738417			1.13912	87.7873	25	0.1	250	30	5020	0.0199203	0.9	11.8041	48.2897	0.244443
F12	1	1	a2	5.02	0.0142583	0.0889	0.0746417			1.13912	87.7873	25	0.1	250	30	5020	0.0199203	0.9	11.8041	48.2897	0.244443
F12	1	1	a2	5.02	0.0142583	0.089	0.0747417			1.13912	87.7873	25	0.1	250	30	5020	0.0199203	0.9	11.8041	48.2897	0.244443
F12	1	1	b1	5.07	0.0142583	0.0639	0.0496417			1.13912	87.7873	25	0.1	250	30	5070	0.0197239	0.9	11.6877	48.2897	0.242032
F12	1	1	b1	5.07	0.0142583	0.0683	0.0540417			1.13912	87.7873	25	0.1	250	30	5070	0.0197239	0.9	11.6877	48.2897	0.242032
F12	1	1	b1	5.07	0.0142583	0.0627	0.0484417			1.13912	87.7873	25	0.1	250	30	5070	0.0197239	0.9	11.6877	48.2897	0.242032
F12	1	1	b2	5.07	0.0142583	0.0738	0.0595417			1.13912	87.7873	25	0.1	250	30	5070	0.0197239	0.9	11.6877	48.2897	0.242032
F12	1	1	b2	5.07	0.0142583	0.0735	0.0592417			1.13912	87.7873	25	0.1	250	30	5070	0.0197239	0.9	11.6877	48.2897	0.242032
F12	1	1	b2	5.07	0.0142583	0.0732	0.0589417			1.13912	87.7873	25	0.1	250	30	5070	0.0197239	0.9	11.6877	48.2897	0.242032
F12	1	2	a1	5.05	0.0142583	0.0633	0.0490417			1.13912	87.7873	25	0.1	250	30	5050	0.019802	0.9	11.7339	48.2897	0.242991
F12	1	2	a1	5.05	0.0142583	0.0623	0.0480417			1.13912	87.7873	25	0.1	250	30	5050	0.019802	0.9	11.7339	48.2897	0.242991
F12	1	2	a1	5.05	0.0142583	0.0625	0.0482417			1.13912	87.7873	25	0.1	250	30	5050	0.019802	0.9	11.7339	48.2897	0.242991
F12	1	2	a2	5.05	0.0142583	0.0786	0.0643417			1.13912	87.7873	25	0.1	250	30	5050	0.019802	0.9	11.7339	48.2897	0.242991
F12	1	2	a2	5.05	0.0142583	0.0789	0.0646417			1.13912	87.7873	25	0.1	250	30	5050	0.019802	0.9	11.7339	48.2897	0.242991
F12	1	2	a2	5.05	0.0142583	0.0792	0.0649417			1.13912	87.7873	25	0.1	250	30	5050	0.019802	0.9	11.7339	48.2897	0.242991
F12	1	2	b1	5.04	0.0142583	0.0798	0.0655417			1.13912	87.7873	25	0.1	250	30	5040	0.0198413	0.9	11.7572	48.2897	0.243473
F12	1	2	b1	5.04	0.0142583	0.08	0.0657417			1.13912	87.7873	25	0.1	250	30	5040	0.0198413	0.9	11.7572	48.2897	0.243473
F12	1	2	b1	5.04	0.0142583	0.0797	0.0654417			1.13912	87.7873	25	0.1	250	30	5040	0.0198413	0.9	11.7572	48.2897	0.243473
F12	1	2	b2	5.04	0.0142583	0.0642	0.0499417			1.13912	87.7873	25	0.1	250	30	5040	0.0198413	0.9	11.7572	48.2897	0.243473
F12	1	2	b2	5.04	0.0142583	0.0636	0.0493417			1.13912	87.7873	25	0.1	250	30	5040	0.0198413	0.9	11.7572	48.2897	0.243473
F12	1	2	b2	5.04	0.0142583	0.0644	0.0501417			1.13912	87.7873	25	0.1	250	30	5040	0.0198413	0.9	11.7572	48.2897	0.243473
F18	1	1	a1	5.04	0.0142583	0.1034	0.0891417			1.13912	87.7873	25	0.1	250	30	5040	0.0198413	0.9	11.7572	53.909	0.218094
F18	1	1	a1	5.04	0.0142583	0.1032	0.0889417			1.13912	87.7873	25	0.1	250	30	5040	0.0198413	0.9	11.7572	53.909	0.218094
F18	1	1	a1	5.04	0.0142583	0.1032	0.0889417			1.13912	87.7873	25	0.1	250	30	5040	0.0198413	0.9	11.7572	53.909	0.218094
F18	1	1	a2	5.04	0.0142583	0.1039	0.0896417			1.13912	87.7873	25	0.1	250	30	5040	0.0198413	0.9	11.7572	53.909	0.218094
F18	1	1	a2	5.04	0.0142583	0.1029	0.0886417			1.13912	87.7873	25	0.1	250	30	5040	0.0198413	0.9	11.7572	53.909	0.218094
F18	1	1	a2	5.04	0.0142583	0.1025	0.0882417			1.13912	87.7873	25	0.1	250	30	5040	0.0198413	0.9	11.7572	53.909	0.218094
F18	1	1	b1	5.05	0.0142583	0.0566	0.0423417			1.13912	87.7873	25	0.1	250	30	5050	0.019802	0.9	11.7339	53.909	0.217662
F18	1	1	b1	5.05	0.0142583	0.0562	0.0419417			1.13912	87.7873	25	0.1	250	30	5050	0.019802	0.9	11.7339	53.909	0.217662
F18	1	1	b1	5.05	0.0142583	0.0569	0.0426417			1.13912	87.7873	25	0.1	250	30	5050	0.019802	0.9	11.7339	53.909	0.217662
F18	1	1	b2	5.05	0.0142583	0.055	0.0407417			1.13912	87.7873	25	0.1	250	30	5050	0.019802	0.9	11.7339	53.909	0.217662
F18	1	1	b2	5.05	0.0142583	0.055	0.0407417			1.13912	87.7873	25	0.1	250	30	5050	0.019802	0.9	11.7339	53.909	0.217662
F18	1	1	b2	5.05	0.0142583	0.059	0.0447417			1.13912	87.7873	25	0.1	250	30	5050	0.019802	0.9	11.7339	53.909	0.217662
F18	1	2	a1	5.05	0.0142583	0.0905	0.0762417			1.13912	87.7873	25	0.1	250	30	5050	0.019802	0.9	11.7339	53.909	0.217662
F18	1	2	a1	5.05	0.0142583	0.0893	0.0750417			1.13912	87.7873	25	0.1	250	30	5050	0.019802	0.9	11.7339	53.909	0.217662
F18	1	2	a1	5.05	0.0142583	0.0898	0.0755417			1.13912	87.7873	25	0.1	250	30	5050	0.019802	0.9	11.7339	53.909	0.217662
F18	1	2	a2	5.05	0.0142583	0.0902	0.0759417			1.13912	87.7873	25	0.1	250	30	5050	0.019802	0.9	11.7339	53.909	0.217662
F18	1	2	a2	5.05	0.0142583	0.09	0.0757417			1.13912	87.7873	25	0.1	250	30	5050	0.019802	0.9	11.7339	53.909	0.217662
F18	1	2	a2	5.05	0.0142583	0.0899	0.0756417			1.13912	87.7873	25	0.1	250	30	5050	0.019802	0.9	11.7339	53.909	0.217662
F18	1	2	b1	5.08	0.0142583	0.1178	0.103542			1.13912	87.7873	25	0.1	250	30	5080	0.019685	0.9	11.6647	53.909	0.216377
F18	1	2	b1	5.08	0.0142583	0.1183	0.104042			1.13912	87.7873	25	0.1	250	30	5080	0.019685	0.9	11.6647	53.909	0.216377
F18	1	2	b1	5.08	0.0142583	0.1181	0.103842			1.13912	87.7873	25	0.1	250	30	5080	0.019685	0.9	11.6647	53.909	0.216377
F18	1	2	b2	5.08	0.0142583	0.1155	0.101242			1.13912	87.7873	25	0.1	250	30	5080	0.019685	0.9	11.6647	53.909	0.216377
F18	1	2	b2	5.08	0.0142583	0.1148	0.100542			1.13912	87.7873	25	0.1	250	30	5080	0.019685	0.9	11.6647	53.909	0.216377
F18	1	2	b2	5.08	0.0142583	0.1144	0.100142			1.13912	87.7873	25	0.1	250	30	5080	0.019685	0.9	11.6647	53.909	0.216377

## Sheet: Gopod S2
sample ID	Sampling	Batch	replication	Sample weight (g)	A510 blank	A510 sample	Asample-Ablank	Acontrol	Asample-Acontrol (ΔA)	A510 glucose STD	F (100µg glucose/A STD)	Extraction volume (mL)	Volume analized (mL)	Extraction V/Analized V	Dilutions	Sample weight (mg)	100/sample weight	162/180	dig. starch %	wet tot. starch %	dig/tot %		g/100g total starch
F1	2	1	a1	5.09	0.0142583	0.0287	0.0144417	0.0148	0.0139	1.13912	87.7873	25	0.1	250	30	5090	0.0196464	0.9	0.16182	61.2394	0.264242		Sampling 2	Mean	SD
F1	2	1	a1	5.09	0.0142583	0.028	0.0137417	0.0145	0.0135	1.13912	87.7873	25	0.1	250	30	5090	0.0196464	0.9	0.157163	61.2394	0.256638		1	0.242086	0.137692				S2	starch dig
F1	2	1	a1	5.09	0.0142583	0.0277	0.0134417	0.0151	0.0126	1.13912	87.7873	25	0.1	250	30	5090	0.0196464	0.9	0.146686	61.2394	0.239528		3	0.465304	0.353619				F1	0.264242
F1	2	1	a2	5.09	0.0142583	0.041	0.0267417	0.0289	0.0121	1.13912	87.7873	25	0.1	250	30	5090	0.0196464	0.9	0.140865	61.2394	0.230023		4	0.307114	0.106526				F1	0.256638
F1	2	1	a2	5.09	0.0142583	0.0408	0.0265417	0.0283	0.0125	1.13912	87.7873	25	0.1	250	30	5090	0.0196464	0.9	0.145522	61.2394	0.237627		5	0.362383	0.202889				F1	0.239528
F1	2	1	a2	5.09	0.0142583	0.0407	0.0264417	0.0286	0.0121	1.13912	87.7873	25	0.1	250	30	5090	0.0196464	0.9	0.140865	61.2394	0.230023		9	0.245536	0.134221				F1	0.230023
F1	2	1	b1	5.06	0.0142583	0.0265	0.0122417	0.0249	0.0016	1.13912	87.7873	25	0.1	250	30	5060	0.0197628	0.9	0.0187372	61.2394	0.0305966		12	0.225952	0.145424				F1	0.237627
F1	2	1	b1	5.06	0.0142583	0.0271	0.0128417	0.0243	0.0028	1.13912	87.7873	25	0.1	250	30	5060	0.0197628	0.9	0.0327901	61.2394	0.0535441		18	0.376818	0.0646587				F1	0.230023
F1	2	1	b1	5.06	0.0142583	0.0268	0.0125417	0.0253	0.0015	1.13912	87.7873	25	0.1	250	30	5060	0.0197628	0.9	0.0175661	61.2394	0.0286844								F1	0.0305966
F1	2	1	b2	5.06	0.0142583	0.0547	0.0404417	0.0294	0.0253	1.13912	87.7873	25	0.1	250	30	5060	0.0197628	0.9	0.296282	61.2394	0.48381								F1	0.0535441
F1	2	1	b2	5.06	0.0142583	0.0547	0.0404417	0.0301	0.0246	1.13912	87.7873	25	0.1	250	30	5060	0.0197628	0.9	0.288085	61.2394	0.470423		g/100g porridge						F1	0.0286844
F1	2	1	b2	5.06	0.0142583	0.0545	0.0402417	0.0299	0.0246	1.13912	87.7873	25	0.1	250	30	5060	0.0197628	0.9	0.288085	61.2394	0.470423		Sampling 2	Mean	SD				F1	0.48381
F1	2	2	a1	5.03	0.0142583	0.0112	-0.00305833	0.0419	-0.0307	1.13912	87.7873	25	0.1	250	30	5030	0.0198807	0.9	-0.361665	61.2394	-0.590575		1	0.148252	0.0843218				F1	0.470423
F1	2	2	a1	5.03	0.0142583	0.0103	-0.00395833	0.0416	-0.0313	1.13912	87.7873	25	0.1	250	30	5030	0.0198807	0.9	-0.368733	61.2394	-0.602117		3	0.26823	0.203847				F1	0.470423
F1	2	2	a1	5.03	0.0142583	0.0102	-0.00405833	0.0416	-0.0314	1.13912	87.7873	25	0.1	250	30	5030	0.0198807	0.9	-0.369911	61.2394	-0.60404		4	0.176567	0.0612445				F1	0.209683
F1	2	2	a2	5.03	0.0142583	0.0096	-0.00465833	0.0458	-0.0362	1.13912	87.7873	25	0.1	250	30	5030	0.0198807	0.9	-0.426458	61.2394	-0.696378		5	0.228104	0.127709				F1	0.132735
F1	2	2	a2	5.03	0.0142583	0.0098	-0.00445833	0.0461	-0.0363	1.13912	87.7873	25	0.1	250	30	5030	0.0198807	0.9	-0.427636	61.2394	-0.698302		9	0.116449	0.0636563				F1	0.248157
F1	2	2	a2	5.03	0.0142583	0.0101	-0.00415833	0.0458	-0.0357	1.13912	87.7873	25	0.1	250	30	5030	0.0198807	0.9	-0.420568	61.2394	-0.686759		12	0.109111	0.0702249				F1	0.36935
F1	2	2	b1	5.03	0.0142583	0.0394	0.0251417	0.0285	0.0109	1.13912	87.7873	25	0.1	250	30	5030	0.0198807	0.9	0.128409	61.2394	0.209683		18	0.203139	0.0348568				F1	0.19237
F1	2	2	b1	5.03	0.0142583	0.0348	0.0205417	0.0279	0.0069	1.13912	87.7873	25	0.1	250	30	5030	0.0198807	0.9	0.0812862	61.2394	0.132735								F1	0.209683
F1	2	2	b1	5.03	0.0142583	0.0401	0.0258417	0.0272	0.0129	1.13912	87.7873	25	0.1	250	30	5030	0.0198807	0.9	0.15197	61.2394	0.248157								F3	0.157046
F1	2	2	b2	5.03	0.0142583	0.063	0.0487417	0.0438	0.0192	1.13912	87.7873	25	0.1	250	30	5030	0.0198807	0.9	0.226188	61.2394	0.36935								F3	0.175402
F1	2	2	b2	5.03	0.0142583	0.053	0.0387417	0.043	0.01	1.13912	87.7873	25	0.1	250	30	5030	0.0198807	0.9	0.117806	61.2394	0.19237								F3	0.201916
F1	2	2	b2	5.03	0.0142583	0.0539	0.0396417	0.043	0.0109	1.13912	87.7873	25	0.1	250	30	5030	0.0198807	0.9	0.128409	61.2394	0.209683								F3	0.316131
F3	2	1	a1	5.04	0.0142583	0.1172	0.102942	0.1095	0.0077	1.13912	87.7873	25	0.1	250	30	5040	0.0198413	0.9	0.0905307	57.6461	0.157046								F3	0.310012
F3	2	1	a1	5.04	0.0142583	0.1176	0.103342	0.109	0.0086	1.13912	87.7873	25	0.1	250	30	5040	0.0198413	0.9	0.101112	57.6461	0.175402								F3	0.305933
F3	2	1	a1	5.04	0.0142583	0.1183	0.104042	0.1084	0.0099	1.13912	87.7873	25	0.1	250	30	5040	0.0198413	0.9	0.116397	57.6461	0.201916								F3	0.359675
F3	2	1	a2	5.04	0.0142583	0.1257	0.111442	0.1102	0.0155	1.13912	87.7873	25	0.1	250	30	5040	0.0198413	0.9	0.182237	57.6461	0.316131								F3	0.371937
F3	2	1	a2	5.04	0.0142583	0.1258	0.111542	0.1106	0.0152	1.13912	87.7873	25	0.1	250	30	5040	0.0198413	0.9	0.17871	57.6461	0.310012								F3	0.382155
F3	2	1	a2	5.04	0.0142583	0.1257	0.111442	0.1107	0.015	1.13912	87.7873	25	0.1	250	30	5040	0.0198413	0.9	0.176358	57.6461	0.305933								F3	0.835836
F3	2	1	b1	5.03	0.0142583	0.1305	0.116242	0.1129	0.0176	1.13912	87.7873	25	0.1	250	30	5030	0.0198807	0.9	0.207339	57.6461	0.359675								F3	0.839924
F3	2	1	b1	5.03	0.0142583	0.1307	0.116442	0.1125	0.0182	1.13912	87.7873	25	0.1	250	30	5030	0.0198807	0.9	0.214407	57.6461	0.371937								F3	0.850142
F3	2	1	b1	5.03	0.0142583	0.1311	0.116842	0.1124	0.0187	1.13912	87.7873	25	0.1	250	30	5030	0.0198807	0.9	0.220297	57.6461	0.382155								F3	0.130016
F3	2	1	b2	5.03	0.0142583	0.1475	0.133242	0.1066	0.0409	1.13912	87.7873	25	0.1	250	30	5030	0.0198807	0.9	0.481827	57.6461	0.835836								F3	0.117827
F3	2	1	b2	5.03	0.0142583	0.1482	0.133942	0.1071	0.0411	1.13912	87.7873	25	0.1	250	30	5030	0.0198807	0.9	0.484183	57.6461	0.839924								F3	0.107669
F3	2	1	b2	5.03	0.0142583	0.1478	0.133542	0.1062	0.0416	1.13912	87.7873	25	0.1	250	30	5030	0.0198807	0.9	0.490073	57.6461	0.850142								F3	0.306756
F3	2	2	a1	5.06	0.0142583	0.1125	0.0982417	0.1061	0.0064	1.13912	87.7873	25	0.1	250	30	5060	0.0197628	0.9	0.0749489	57.6461	0.130016								F3	0.323007
F3	2	2	a1	5.06	0.0142583	0.1122	0.0979417	0.1064	0.0058	1.13912	87.7873	25	0.1	250	30	5060	0.0197628	0.9	0.0679224	57.6461	0.117827								F3	0.331133
F3	2	2	a1	5.06	0.0142583	0.1114	0.0971417	0.1061	0.0053	1.13912	87.7873	25	0.1	250	30	5060	0.0197628	0.9	0.062067	57.6461	0.107669								F3	0.378606
F3	2	2	a2	5.06	0.0142583	0.1083	0.0940417	0.0932	0.0151	1.13912	87.7873	25	0.1	250	30	5060	0.0197628	0.9	0.176832	57.6461	0.306756								F3	0.366393
F3	2	2	a2	5.06	0.0142583	0.1082	0.0939417	0.0923	0.0159	1.13912	87.7873	25	0.1	250	30	5060	0.0197628	0.9	0.186201	57.6461	0.323007								F3	0.376571
F3	2	2	a2	5.06	0.0142583	0.1078	0.0935417	0.0915	0.0163	1.13912	87.7873	25	0.1	250	30	5060	0.0197628	0.9	0.190885	57.6461	0.331133								F3	1.2091
F3	2	2	b1	5.05	0.0142583	0.0942	0.0799417	0.0756	0.0186	1.13912	87.7873	25	0.1	250	30	5050	0.019802	0.9	0.218251	57.6461	0.378606								F3	1.21317
F3	2	2	b1	5.05	0.0142583	0.094	0.0797417	0.076	0.018	1.13912	87.7873	25	0.1	250	30	5050	0.019802	0.9	0.211211	57.6461	0.366393								F3	1.20095
F3	2	2	b1	5.05	0.0142583	0.0943	0.0800417	0.0758	0.0185	1.13912	87.7873	25	0.1	250	30	5050	0.019802	0.9	0.217078	57.6461	0.376571								F4	0.38574
F3	2	2	b2	5.05	0.0142583	0.1563	0.142042	0.0969	0.0594	1.13912	87.7873	25	0.1	250	30	5050	0.019802	0.9	0.696997	57.6461	1.2091								F4	0.357167
F3	2	2	b2	5.05	0.0142583	0.1565	0.142242	0.0969	0.0596	1.13912	87.7873	25	0.1	250	30	5050	0.019802	0.9	0.699343	57.6461	1.21317								F4	0.383699
F3	2	2	b2	5.05	0.0142583	0.1567	0.142442	0.0977	0.059	1.13912	87.7873	25	0.1	250	30	5050	0.019802	0.9	0.692303	57.6461	1.20095								F4	0.30002
F4	2	1	a1	5.05	0.0142583	0.1055	0.0912417	0.0866	0.0189	1.13912	87.7873	25	0.1	250	30	5050	0.019802	0.9	0.221772	57.4925	0.38574								F4	0.281651
F4	2	1	a1	5.05	0.0142583	0.1048	0.0905417	0.0873	0.0175	1.13912	87.7873	25	0.1	250	30	5050	0.019802	0.9	0.205344	57.4925	0.357167								F4	0.27961
F4	2	1	a1	5.05	0.0142583	0.1048	0.0905417	0.086	0.0188	1.13912	87.7873	25	0.1	250	30	5050	0.019802	0.9	0.220598	57.4925	0.383699								F4	0.325155
F4	2	1	a2	5.05	0.0142583	0.0977	0.0834417	0.083	0.0147	1.13912	87.7873	25	0.1	250	30	5050	0.019802	0.9	0.172489	57.4925	0.30002								F4	0.3272
F4	2	1	a2	5.05	0.0142583	0.0975	0.0832417	0.0837	0.0138	1.13912	87.7873	25	0.1	250	30	5050	0.019802	0.9	0.161928	57.4925	0.281651								F4	0.341515
F4	2	1	a2	5.05	0.0142583	0.0977	0.0834417	0.084	0.0137	1.13912	87.7873	25	0.1	250	30	5050	0.019802	0.9	0.160755	57.4925	0.27961								F4	0.35583
F4	2	1	b1	5.04	0.0142583	0.1092	0.0949417	0.0933	0.0159	1.13912	87.7873	25	0.1	250	30	5040	0.0198413	0.9	0.18694	57.4925	0.325155								F4	0.341515
F4	2	1	b1	5.04	0.0142583	0.1093	0.0950417	0.0933	0.016	1.13912	87.7873	25	0.1	250	30	5040	0.0198413	0.9	0.188116	57.4925	0.3272								F4	0.34765
F4	2	1	b1	5.04	0.0142583	0.1099	0.0956417	0.0932	0.0167	1.13912	87.7873	25	0.1	250	30	5040	0.0198413	0.9	0.196346	57.4925	0.341515								F4	0.444048
F4	2	1	b2	5.04	0.0142583	0.091	0.0767417	0.0736	0.0174	1.13912	87.7873	25	0.1	250	30	5040	0.0198413	0.9	0.204576	57.4925	0.35583								F4	0.444048
F4	2	1	b2	5.04	0.0142583	0.0909	0.0766417	0.0742	0.0167	1.13912	87.7873	25	0.1	250	30	5040	0.0198413	0.9	0.196346	57.4925	0.341515								F4	0.452196
F4	2	1	b2	5.04	0.0142583	0.0912	0.0769417	0.0742	0.017	1.13912	87.7873	25	0.1	250	30	5040	0.0198413	0.9	0.199873	57.4925	0.34765								F4	0.112031
F4	2	2	a1	5.06	0.0142583	0.0833	0.0690417	0.0615	0.0218	1.13912	87.7873	25	0.1	250	30	5060	0.0197628	0.9	0.255295	57.4925	0.444048								F4	0.146658
F4	2	2	a1	5.06	0.0142583	0.083	0.0687417	0.0612	0.0218	1.13912	87.7873	25	0.1	250	30	5060	0.0197628	0.9	0.255295	57.4925	0.444048								F4	0.136474
F4	2	2	a1	5.06	0.0142583	0.0829	0.0686417	0.0607	0.0222	1.13912	87.7873	25	0.1	250	30	5060	0.0197628	0.9	0.259979	57.4925	0.452196								F4	0.366783
F4	2	2	a2	5.06	0.0142583	0.0835	0.0692417	0.078	0.0055	1.13912	87.7873	25	0.1	250	30	5060	0.0197628	0.9	0.0644092	57.4925	0.112031								F4	0.24179
F4	2	2	a2	5.06	0.0142583	0.0842	0.0699417	0.077	0.0072	1.13912	87.7873	25	0.1	250	30	5060	0.0197628	0.9	0.0843175	57.4925	0.146658								F4	0.471286
F4	2	2	a2	5.06	0.0142583	0.0837	0.0694417	0.077	0.0067	1.13912	87.7873	25	0.1	250	30	5060	0.0197628	0.9	0.0784621	57.4925	0.136474								F4	0.170073
F4	2	2	b1	5.03	0.0142583	0.1093	0.0950417	0.0914	0.0179	1.13912	87.7873	25	0.1	250	30	5030	0.0198807	0.9	0.210873	57.4925	0.366783								F4	0.188514
F4	2	2	b1	5.03	0.0142583	0.1093	0.0950417	0.0975	0.0118	1.13912	87.7873	25	0.1	250	30	5030	0.0198807	0.9	0.139011	57.4925	0.24179								F4	0.170073
F4	2	2	b1	5.03	0.0142583	0.1084	0.0941417	0.0854	0.023	1.13912	87.7873	25	0.1	250	30	5030	0.0198807	0.9	0.270954	57.4925	0.471286								F5	0.308195
F4	2	2	b2	5.03	0.0142583	0.1135	0.0992417	0.1052	0.0083	1.13912	87.7873	25	0.1	250	30	5030	0.0198807	0.9	0.097779	57.4925	0.170073								F5	0.289516
F4	2	2	b2	5.03	0.0142583	0.1139	0.0996417	0.1047	0.0092	1.13912	87.7873	25	0.1	250	30	5030	0.0198807	0.9	0.108382	57.4925	0.188514								F5	0.289516
F4	2	2	b2	5.03	0.0142583	0.1135	0.0992417	0.1052	0.0083	1.13912	87.7873	25	0.1	250	30	5030	0.0198807	0.9	0.097779	57.4925	0.170073								F5	0.522997
F5	2	1	a1	5.04	0.0142583	0.108	0.0937417	0.0915	0.0165	1.13912	87.7873	25	0.1	250	30	5040	0.0198413	0.9	0.193994	62.9454	0.308195								F5	0.522997
F5	2	1	a1	5.04	0.0142583	0.1081	0.0938417	0.0926	0.0155	1.13912	87.7873	25	0.1	250	30	5040	0.0198413	0.9	0.182237	62.9454	0.289516								F5	0.51179
F5	2	1	a1	5.04	0.0142583	0.1087	0.0944417	0.0932	0.0155	1.13912	87.7873	25	0.1	250	30	5040	0.0198413	0.9	0.182237	62.9454	0.289516								F5	0.809821
F5	2	1	a2	5.04	0.0142583	0.1401	0.125842	0.1121	0.028	1.13912	87.7873	25	0.1	250	30	5040	0.0198413	0.9	0.329202	62.9454	0.522997								F5	0.824646
F5	2	1	a2	5.04	0.0142583	0.1399	0.125642	0.1119	0.028	1.13912	87.7873	25	0.1	250	30	5040	0.0198413	0.9	0.329202	62.9454	0.522997								F5	0.824646
F5	2	1	a2	5.04	0.0142583	0.1396	0.125342	0.1122	0.0274	1.13912	87.7873	25	0.1	250	30	5040	0.0198413	0.9	0.322148	62.9454	0.51179								F5	0.270558
F5	2	1	b1	5.08	0.0142583	0.1601	0.145842	0.1164	0.0437	1.13912	87.7873	25	0.1	250	30	5080	0.019685	0.9	0.509745	62.9454	0.809821								F5	0.270558
F5	2	1	b1	5.08	0.0142583	0.1599	0.145642	0.1154	0.0445	1.13912	87.7873	25	0.1	250	30	5080	0.019685	0.9	0.519077	62.9454	0.824646								F5	0.268705
F5	2	1	b1	5.08	0.0142583	0.1603	0.146042	0.1158	0.0445	1.13912	87.7873	25	0.1	250	30	5080	0.019685	0.9	0.519077	62.9454	0.824646								F5	0.245581
F5	2	1	b2	5.08	0.0142583	0.1231	0.108842	0.1085	0.0146	1.13912	87.7873	25	0.1	250	30	5080	0.019685	0.9	0.170304	62.9454	0.270558								F5	0.243721
F5	2	1	b2	5.08	0.0142583	0.1231	0.108842	0.1085	0.0146	1.13912	87.7873	25	0.1	250	30	5080	0.019685	0.9	0.170304	62.9454	0.270558								F5	0.256744
F5	2	1	b2	5.08	0.0142583	0.1231	0.108842	0.1086	0.0145	1.13912	87.7873	25	0.1	250	30	5080	0.019685	0.9	0.169137	62.9454	0.268705								F5	0.262325
F5	2	2	a1	5.06	0.0142583	0.1187	0.104442	0.1055	0.0132	1.13912	87.7873	25	0.1	250	30	5060	0.0197628	0.9	0.154582	62.9454	0.245581								F5	0.288372
F5	2	2	a1	5.06	0.0142583	0.1188	0.104542	0.1057	0.0131	1.13912	87.7873	25	0.1	250	30	5060	0.0197628	0.9	0.153411	62.9454	0.243721								F5	0.275348
F5	2	2	a1	5.06	0.0142583	0.1184	0.104142	0.1046	0.0138	1.13912	87.7873	25	0.1	250	30	5060	0.0197628	0.9	0.161608	62.9454	0.256744								F5	0.147268
F5	2	2	a2	5.06	0.0142583	0.1192	0.104942	0.1051	0.0141	1.13912	87.7873	25	0.1	250	30	5060	0.0197628	0.9	0.165122	62.9454	0.262325								F5	0.145403
F5	2	2	a2	5.06	0.0142583	0.1197	0.105442	0.1042	0.0155	1.13912	87.7873	25	0.1	250	30	5060	0.0197628	0.9	0.181517	62.9454	0.288372								F5	0.149132
F5	2	2	a2	5.06	0.0142583	0.1195	0.105242	0.1047	0.0148	1.13912	87.7873	25	0.1	250	30	5060	0.0197628	0.9	0.173319	62.9454	0.275348								F5	0.301992
F5	2	2	b1	5.05	0.0142583	0.152	0.137742	0.1441	0.0079	1.13912	87.7873	25	0.1	250	30	5050	0.019802	0.9	0.0926982	62.9454	0.147268								F5	0.331818
F5	2	2	b1	5.05	0.0142583	0.1512	0.136942	0.1434	0.0078	1.13912	87.7873	25	0.1	250	30	5050	0.019802	0.9	0.0915248	62.9454	0.145403								F5	0.335546
F5	2	2	b1	5.05	0.0142583	0.1524	0.138142	0.1444	0.008	1.13912	87.7873	25	0.1	250	30	5050	0.019802	0.9	0.0938716	62.9454	0.149132
F5	2	2	b2	5.05	0.0142583	0.1349	0.120642	0.1187	0.0162	1.13912	87.7873	25	0.1	250	30	5050	0.019802	0.9	0.19009	62.9454	0.301992
F5	2	2	b2	5.05	0.0142583	0.1353	0.121042	0.1175	0.0178	1.13912	87.7873	25	0.1	250	30	5050	0.019802	0.9	0.208864	62.9454	0.331818
F5	2	2	b2	5.05	0.0142583	0.1352	0.120942	0.1172	0.018	1.13912	87.7873	25	0.1	250	30	5050	0.019802	0.9	0.211211	62.9454	0.335546
F9	2	1	a1	5.03	0.0142583	0.0395	0.0252417	0.0334	0.0061	1.13912	87.7873	25	0.1	250	30	5030	0.0198807	0.9	0.0718617	47.4264	0.151523
F9	2	1	a1	5.03	0.0142583	0.039	0.0247417	0.0329	0.0061	1.13912	87.7873	25	0.1	250	30	5030	0.0198807	0.9	0.0718617	47.4264	0.151523
F9	2	1	a1	5.03	0.0142583	0.0388	0.0245417	0.0334	0.0054	1.13912	87.7873	25	0.1	250	30	5030	0.0198807	0.9	0.0636153	47.4264	0.134135
F9	2	1	a2	5.03	0.0142583	0.0515	0.0372417	0.0334	0.0181	1.13912	87.7873	25	0.1	250	30	5030	0.0198807	0.9	0.213229	47.4264	0.4496
F9	2	1	a2	5.03	0.0142583	0.0513	0.0370417	0.0345	0.0168	1.13912	87.7873	25	0.1	250	30	5030	0.0198807	0.9	0.197914	47.4264	0.417308
F9	2	1	a2	5.03	0.0142583	0.0513	0.0370417	0.0348	0.0165	1.13912	87.7873	25	0.1	250	30	5030	0.0198807	0.9	0.19438	47.4264	0.409856
F9	2	1	b1	5.04	0.0142583	0.0403	0.0260417	0.0315	0.0088	1.13912	87.7873	25	0.1	250	30	5040	0.0198413	0.9	0.103464	47.4264	0.218156
F9	2	1	b1	5.04	0.0142583	0.0415	0.0272417	0.0319	0.0096	1.13912	87.7873	25	0.1	250	30	5040	0.0198413	0.9	0.112869	47.4264	0.237989
F9	2	1	b1	5.04	0.0142583	0.041	0.0267417	0.0328	0.0082	1.13912	87.7873	25	0.1	250	30	5040	0.0198413	0.9	0.0964093	47.4264	0.203282
F9	2	1	b2	5.04	0.0142583	0.0378	0.0235417	0.0336	0.0042	1.13912	87.7873	25	0.1	250	30	5040	0.0198413	0.9	0.0493804	47.4264	0.10412
F9	2	1	b2	5.04	0.0142583	0.0384	0.0241417	0.0339	0.0045	1.13912	87.7873	25	0.1	250	30	5040	0.0198413	0.9	0.0529075	47.4264	0.111557
F9	2	1	b2	5.04	0.0142583	0.0384	0.0241417	0.0337	0.0047	1.13912	87.7873	25	0.1	250	30	5040	0.0198413	0.9	0.055259	47.4264	0.116515
F9	2	2	a1	5.06	0.0142583	0.0329	0.0186417	0.0284	0.0045	1.13912	87.7873	25	0.1	250	30	5060	0.0197628	0.9	0.0526984	47.4264	0.111116
F9	2	2	a1	5.06	0.0142583	0.033	0.0187417	0.0281	0.0049	1.13912	87.7873	25	0.1	250	30	5060	0.0197628	0.9	0.0573827	47.4264	0.120993
F9	2	2	a1	5.06	0.0142583	0.0329	0.0186417	0.0289	0.004	1.13912	87.7873	25	0.1	250	30	5060	0.0197628	0.9	0.046843	47.4264	0.09877
F9	2	2	a2	5.06	0.0142583	0.0271	0.0128417	0.0126	0.0145	1.13912	87.7873	25	0.1	250	30	5060	0.0197628	0.9	0.169806	47.4264	0.358041
F9	2	2	a2	5.06	0.0142583	0.0279	0.0136417	0.0126	0.0153	1.13912	87.7873	25	0.1	250	30	5060	0.0197628	0.9	0.179175	47.4264	0.377795
F9	2	2	a2	5.06	0.0142583	0.0276	0.0133417	0.0126	0.015	1.13912	87.7873	25	0.1	250	30	5060	0.0197628	0.9	0.175661	47.4264	0.370387
F9	2	2	b1	5.09	0.0142583	0.0289	0.0146417	0.0122	0.0167	1.13912	87.7873	25	0.1	250	30	5090	0.0196464	0.9	0.194417	47.4264	0.409934
F9	2	2	b1	5.09	0.0142583	0.0293	0.0150417	0.0116	0.0177	1.13912	87.7873	25	0.1	250	30	5090	0.0196464	0.9	0.206059	47.4264	0.434481
F9	2	2	b1	5.09	0.0142583	0.03	0.0157417	0.0119	0.0181	1.13912	87.7873	25	0.1	250	30	5090	0.0196464	0.9	0.210715	47.4264	0.4443
F9	2	2	b2	5.09	0.0142583	0.0309	0.0166417	0.0245	0.0064	1.13912	87.7873	25	0.1	250	30	5090	0.0196464	0.9	0.0745071	47.4264	0.157101
F9	2	2	b2	5.09	0.0142583	0.0303	0.0160417	0.0248	0.0055	1.13912	87.7873	25	0.1	250	30	5090	0.0196464	0.9	0.0640296	47.4264	0.135008
F9	2	2	b2	5.09	0.0142583	0.0307	0.0164417	0.0238	0.0069	1.13912	87.7873	25	0.1	250	30	5090	0.0196464	0.9	0.080328	47.4264	0.169374
F12	2	1	a1	5.02	0.0142583	0.0901	0.0758417	0.0825	0.0076	1.13912	87.7873	25	0.1	250	30	5020	0.0199203	0.9	0.0897109	48.2897	0.185777
F12	2	1	a1	5.02	0.0142583	0.0904	0.0761417	0.0824	0.008	1.13912	87.7873	25	0.1	250	30	5020	0.0199203	0.9	0.0944326	48.2897	0.195554
F12	2	1	a1	5.02	0.0142583	0.0899	0.0756417	0.0829	0.007	1.13912	87.7873	25	0.1	250	30	5020	0.0199203	0.9	0.0826285	48.2897	0.17111
F12	2	1	a2	5.02	0.0142583	0.0908	0.0765417	0.0881	0.0027	1.13912	87.7873	25	0.1	250	30	5020	0.0199203	0.9	0.031871	48.2897	0.0659996
F12	2	1	a2	5.02	0.0142583	0.0896	0.0753417	0.0889	0.0007	1.13912	87.7873	25	0.1	250	30	5020	0.0199203	0.9	0.00826285	48.2897	0.017111
F12	2	1	a2	5.02	0.0142583	0.0893	0.0750417	0.089	0.0003	1.13912	87.7873	25	0.1	250	30	5020	0.0199203	0.9	0.00354122	48.2897	0.00733329
F12	2	1	b1	5.07	0.0142583	0.0755	0.0612417	0.0639	0.0116	1.13912	87.7873	25	0.1	250	30	5070	0.0197239	0.9	0.135577	48.2897	0.280757
F12	2	1	b1	5.07	0.0142583	0.0757	0.0614417	0.0683	0.0074	1.13912	87.7873	25	0.1	250	30	5070	0.0197239	0.9	0.0864887	48.2897	0.179104
F12	2	1	b1	5.07	0.0142583	0.0763	0.0620417	0.0627	0.0136	1.13912	87.7873	25	0.1	250	30	5070	0.0197239	0.9	0.158952	48.2897	0.329164
F12	2	1	b2	5.07	0.0142583	0.0834	0.0691417	0.0738	0.0096	1.13912	87.7873	25	0.1	250	30	5070	0.0197239	0.9	0.112202	48.2897	0.232351
F12	2	1	b2	5.07	0.0142583	0.083	0.0687417	0.0735	0.0095	1.13912	87.7873	25	0.1	250	30	5070	0.0197239	0.9	0.111033	48.2897	0.229931
F12	2	1	b2	5.07	0.0142583	0.0834	0.0691417	0.0732	0.0102	1.13912	87.7873	25	0.1	250	30	5070	0.0197239	0.9	0.119214	48.2897	0.246873
F12	2	2	a1	5.05	0.0142583	0.0795	0.0652417	0.0633	0.0162	1.13912	87.7873	25	0.1	250	30	5050	0.019802	0.9	0.19009	48.2897	0.393645
F12	2	2	a1	5.05	0.0142583	0.0789	0.0646417	0.0623	0.0166	1.13912	87.7873	25	0.1	250	30	5050	0.019802	0.9	0.194784	48.2897	0.403365
F12	2	2	a1	5.05	0.0142583	0.0788	0.0645417	0.0625	0.0163	1.13912	87.7873	25	0.1	250	30	5050	0.019802	0.9	0.191263	48.2897	0.396075
F12	2	2	a2	5.05	0.0142583	0.0814	0.0671417	0.0786	0.0028	1.13912	87.7873	25	0.1	250	30	5050	0.019802	0.9	0.0328551	48.2897	0.0680374
F12	2	2	a2	5.05	0.0142583	0.0811	0.0668417	0.0789	0.0022	1.13912	87.7873	25	0.1	250	30	5050	0.019802	0.9	0.0258147	48.2897	0.053458
F12	2	2	a2	5.05	0.0142583	0.0806	0.0663417	0.0792	0.0014	1.13912	87.7873	25	0.1	250	30	5050	0.019802	0.9	0.0164275	48.2897	0.0340187
F12	2	2	b1	5.04	0.0142583	0.0874	0.0731417	0.0798	0.0076	1.13912	87.7873	25	0.1	250	30	5040	0.0198413	0.9	0.089355	48.2897	0.185039
F12	2	2	b1	5.04	0.0142583	0.0875	0.0732417	0.08	0.0075	1.13912	87.7873	25	0.1	250	30	5040	0.0198413	0.9	0.0881792	48.2897	0.182605
F12	2	2	b1	5.04	0.0142583	0.0875	0.0732417	0.0797	0.0078	1.13912	87.7873	25	0.1	250	30	5040	0.0198413	0.9	0.0917064	48.2897	0.189909
F12	2	2	b2	5.04	0.0142583	0.0829	0.0686417	0.0642	0.0187	1.13912	87.7873	25	0.1	250	30	5040	0.0198413	0.9	0.21986	48.2897	0.455294
F12	2	2	b2	5.04	0.0142583	0.083	0.0687417	0.0636	0.0194	1.13912	87.7873	25	0.1	250	30	5040	0.0198413	0.9	0.22809	48.2897	0.472337
F12	2	2	b2	5.04	0.0142583	0.0828	0.0685417	0.0644	0.0184	1.13912	87.7873	25	0.1	250	30	5040	0.0198413	0.9	0.216333	48.2897	0.44799
F18	2	1	a1	5.04	0.0142583	0.1164	0.102142	0.1034	0.013	1.13912	87.7873	25	0.1	250	30	5040	0.0198413	0.9	0.152844	53.909	0.283522
F18	2	1	a1	5.04	0.0142583	0.1167	0.102442	0.1032	0.0135	1.13912	87.7873	25	0.1	250	30	5040	0.0198413	0.9	0.158723	53.909	0.294427
F18	2	1	a1	5.04	0.0142583	0.1161	0.101842	0.1032	0.0129	1.13912	87.7873	25	0.1	250	30	5040	0.0198413	0.9	0.151668	53.909	0.281341
F18	2	1	a2	5.04	0.0142583	0.1228	0.108542	0.1039	0.0189	1.13912	87.7873	25	0.1	250	30	5040	0.0198413	0.9	0.222212	53.909	0.412198
F18	2	1	a2	5.04	0.0142583	0.1231	0.108842	0.1029	0.0202	1.13912	87.7873	25	0.1	250	30	5040	0.0198413	0.9	0.237496	53.909	0.44055
F18	2	1	a2	5.04	0.0142583	0.123	0.108742	0.1025	0.0205	1.13912	87.7873	25	0.1	250	30	5040	0.0198413	0.9	0.241023	53.909	0.447093
F18	2	1	b1	5.05	0.0142583	0.0684	0.0541417	0.0566	0.0118	1.13912	87.7873	25	0.1	250	30	5050	0.019802	0.9	0.138461	53.909	0.256842
F18	2	1	b1	5.05	0.0142583	0.0679	0.0536417	0.0562	0.0117	1.13912	87.7873	25	0.1	250	30	5050	0.019802	0.9	0.137287	53.909	0.254665
F18	2	1	b1	5.05	0.0142583	0.0688	0.0545417	0.0569	0.0119	1.13912	87.7873	25	0.1	250	30	5050	0.019802	0.9	0.139634	53.909	0.259018
F18	2	1	b2	5.05	0.0142583	0.0664	0.0521417	0.055	0.0114	1.13912	87.7873	25	0.1	250	30	5050	0.019802	0.9	0.133767	53.909	0.248135
F18	2	1	b2	5.05	0.0142583	0.0664	0.0521417	0.055	0.0114	1.13912	87.7873	25	0.1	250	30	5050	0.019802	0.9	0.133767	53.909	0.248135
F18	2	1	b2	5.05	0.0142583	0.0665	0.0522417	0.059	0.0075	1.13912	87.7873	25	0.1	250	30	5050	0.019802	0.9	0.0880046	53.909	0.163247
F18	2	2	a1	5.05	0.0142583	0.103	0.0887417	0.0905	0.0125	1.13912	87.7873	25	0.1	250	30	5050	0.019802	0.9	0.146674	53.909	0.272078
F18	2	2	a1	5.05	0.0142583	0.103	0.0887417	0.0893	0.0137	1.13912	87.7873	25	0.1	250	30	5050	0.019802	0.9	0.160755	53.909	0.298197
F18	2	2	a1	5.05	0.0142583	0.1041	0.0898417	0.0898	0.0143	1.13912	87.7873	25	0.1	250	30	5050	0.019802	0.9	0.167795	53.909	0.311257
F18	2	2	a2	5.05	0.0142583	0.1091	0.0948417	0.0902	0.0189	1.13912	87.7873	25	0.1	250	30	5050	0.019802	0.9	0.221772	53.909	0.411382
F18	2	2	a2	5.05	0.0142583	0.1099	0.0956417	0.09	0.0199	1.13912	87.7873	25	0.1	250	30	5050	0.019802	0.9	0.233506	53.909	0.433148
F18	2	2	a2	5.05	0.0142583	0.1086	0.0943417	0.0899	0.0187	1.13912	87.7873	25	0.1	250	30	5050	0.019802	0.9	0.219425	53.909	0.407029
F18	2	2	b1	5.08	0.0142583	0.137	0.122742	0.1178	0.0192	1.13912	87.7873	25	0.1	250	30	5080	0.019685	0.9	0.223961	53.909	0.415444
F18	2	2	b1	5.08	0.0142583	0.1367	0.122442	0.1183	0.0184	1.13912	87.7873	25	0.1	250	30	5080	0.019685	0.9	0.21463	53.909	0.398134
F18	2	2	b1	5.08	0.0142583	0.1369	0.122642	0.1181	0.0188	1.13912	87.7873	25	0.1	250	30	5080	0.019685	0.9	0.219295	53.909	0.406789
F18	2	2	b2	5.08	0.0142583	0.1349	0.120642	0.1155	0.0194	1.13912	87.7873	25	0.1	250	30	5080	0.019685	0.9	0.226294	53.909	0.419771
F18	2	2	b2	5.08	0.0142583	0.1341	0.119842	0.1148	0.0193	1.13912	87.7873	25	0.1	250	30	5080	0.019685	0.9	0.225128	53.909	0.417607
F18	2	2	b2	5.08	0.0142583	0.1344	0.120142	0.1144	0.02	1.13912	87.7873	25	0.1	250	30	5080	0.019685	0.9	0.233293	53.909	0.432754

## Sheet: Gopod S3
sample ID	Sampling	Batch	replication	Sample weight (g)	A510 blank	A510 sample	Asample-Ablank	Acontrol	Asample-Acontrol (ΔA)	A510 glucose STD	F (100µg glucose/A STD)	Extraction volume (mL)	Volume analized (mL)	Extraction V/Analized V	Dilutions	Sample weight (mg)	100/sample weight	162/180	dig. starch %	wet tot. starch %	dig/tot %		g/100g total starch
F1	3	1	a1	5.09	0.0142583	0.5426	0.528342	0.0148	0.5278	1.13912	87.7873	45	0.1	450	30	5090	0.0196464	0.9	11.0601	61.2394	18.0604		Sampling 3	Mean	SD
F1	3	1	a1	5.09	0.0142583	0.5422	0.527942	0.0145	0.5277	1.13912	87.7873	45	0.1	450	30	5090	0.0196464	0.9	11.058	61.2394	18.057		1	16.9165	1.83844				S3	starch dig
F1	3	1	a1	5.09	0.0142583	0.5412	0.526942	0.0151	0.5261	1.13912	87.7873	45	0.1	450	30	5090	0.0196464	0.9	11.0245	61.2394	18.0023		3	17.3688	1.26348				F1	18.0604
F1	3	1	a2	5.09	0.0142583	0.5722	0.557942	0.0289	0.5433	1.13912	87.7873	45	0.1	450	30	5090	0.0196464	0.9	11.3849	61.2394	18.5908		4	16.1492	1.44158				F1	18.057
F1	3	1	a2	5.09	0.0142583	0.571	0.556742	0.0283	0.5427	1.13912	87.7873	45	0.1	450	30	5090	0.0196464	0.9	11.3723	61.2394	18.5703		5	13.6554	1.05294				F1	18.0023
F1	3	1	a2	5.09	0.0142583	0.5708	0.556542	0.0286	0.5422	1.13912	87.7873	45	0.1	450	30	5090	0.0196464	0.9	11.3619	61.2394	18.5532		9	19.9584	0.854031				F1	18.5908
F1	3	1	b1	5.06	0.0142583	0.5597	0.545442	0.0249	0.5348	1.13912	87.7873	45	0.1	450	30	5060	0.0197628	0.9	11.2732	61.2394	18.4085		12	21.4844	0.994817				F1	18.5703
F1	3	1	b1	5.06	0.0142583	0.5595	0.545242	0.0243	0.5352	1.13912	87.7873	45	0.1	450	30	5060	0.0197628	0.9	11.2817	61.2394	18.4222		18	19.2163	1.5224				F1	18.5532
F1	3	1	b1	5.06	0.0142583	0.5592	0.544942	0.0253	0.5339	1.13912	87.7873	45	0.1	450	30	5060	0.0197628	0.9	11.2543	61.2394	18.3775								F1	18.4085
F1	3	1	b2	5.06	0.0142583	0.6001	0.585842	0.0294	0.5707	1.13912	87.7873	45	0.1	450	30	5060	0.0197628	0.9	12.03	61.2394	19.6442								F1	18.4222
F1	3	1	b2	5.06	0.0142583	0.5993	0.585042	0.0301	0.5692	1.13912	87.7873	45	0.1	450	30	5060	0.0197628	0.9	11.9984	61.2394	19.5926		g/100g porridge						F1	18.3775
F1	3	1	b2	5.06	0.0142583	0.5992	0.584942	0.0299	0.5693	1.13912	87.7873	45	0.1	450	30	5060	0.0197628	0.9	12.0005	61.2394	19.596		Sampling 3	Mean	SD				F1	19.6442
F1	3	2	a1	5.03	0.0142583	0.4757	0.461442	0.0419	0.4338	1.13912	87.7873	45	0.1	450	30	5030	0.0198807	0.9	9.19877	61.2394	15.021		1	10.3596	1.12585				F1	19.5926
F1	3	2	a1	5.03	0.0142583	0.4748	0.460542	0.0416	0.4332	1.13912	87.7873	45	0.1	450	30	5030	0.0198807	0.9	9.18604	61.2394	15.0002		3	10.0124	0.728348				F1	19.596
F1	3	2	a1	5.03	0.0142583	0.4746	0.460342	0.0416	0.433	1.13912	87.7873	45	0.1	450	30	5030	0.0198807	0.9	9.1818	61.2394	14.9933		4	9.28457	0.828798				F1	15.021
F1	3	2	a2	5.03	0.0142583	0.4929	0.478642	0.0458	0.4471	1.13912	87.7873	45	0.1	450	30	5030	0.0198807	0.9	9.4808	61.2394	15.4815		5	8.59543	0.662777				F1	15.0002
F1	3	2	a2	5.03	0.0142583	0.4937	0.479442	0.0461	0.4476	1.13912	87.7873	45	0.1	450	30	5030	0.0198807	0.9	9.4914	61.2394	15.4988		9	9.46554	0.405036				F1	14.9933
F1	3	2	a2	5.03	0.0142583	0.4941	0.479842	0.0458	0.4483	1.13912	87.7873	45	0.1	450	30	5030	0.0198807	0.9	9.50624	61.2394	15.5231		12	10.3748	0.480394				F1	15.4815
F1	3	2	b1	5.03	0.0142583	0.4727	0.458442	0.0285	0.4442	1.13912	87.7873	45	0.1	450	30	5030	0.0198807	0.9	9.4193	61.2394	15.3811		18	10.3593	0.820708				F1	15.4988
F1	3	2	b1	5.03	0.0142583	0.4727	0.458442	0.0279	0.4448	1.13912	87.7873	45	0.1	450	30	5030	0.0198807	0.9	9.43202	61.2394	15.4019								F1	15.5231
F1	3	2	b1	5.03	0.0142583	0.473	0.458742	0.0272	0.4458	1.13912	87.7873	45	0.1	450	30	5030	0.0198807	0.9	9.45323	61.2394	15.4365								F1	15.3811
F1	3	2	b2	5.03	0.0142583	0.4705	0.456242	0.0438	0.4267	1.13912	87.7873	45	0.1	450	30	5030	0.0198807	0.9	9.04821	61.2394	14.7751								F1	15.4019
F1	3	2	b2	5.03	0.0142583	0.4708	0.456542	0.043	0.4278	1.13912	87.7873	45	0.1	450	30	5030	0.0198807	0.9	9.07154	61.2394	14.8132								F1	15.4365
F1	3	2	b2	5.03	0.0142583	0.4703	0.456042	0.043	0.4273	1.13912	87.7873	45	0.1	450	30	5030	0.0198807	0.9	9.06093	61.2394	14.7959								F1	14.7751
F3	3	1	a1	5.04	0.0142583	0.5904	0.576142	0.1095	0.4809	1.13912	87.7873	45	0.1	450	30	5040	0.0198413	0.9	10.1773	57.6461	17.6548								F1	14.8132
F3	3	1	a1	5.04	0.0142583	0.5896	0.575342	0.109	0.4806	1.13912	87.7873	45	0.1	450	30	5040	0.0198413	0.9	10.1709	57.6461	17.6438								F1	14.7959
F3	3	1	a1	5.04	0.0142583	0.5887	0.574442	0.1084	0.4803	1.13912	87.7873	45	0.1	450	30	5040	0.0198413	0.9	10.1646	57.6461	17.6328								F3	17.6548
F3	3	1	a2	5.04	0.0142583	0.634	0.619742	0.1102	0.5238	1.13912	87.7873	45	0.1	450	30	5040	0.0198413	0.9	11.0852	57.6461	19.2297								F3	17.6438
F3	3	1	a2	5.04	0.0142583	0.6332	0.618942	0.1106	0.5226	1.13912	87.7873	45	0.1	450	30	5040	0.0198413	0.9	11.0598	57.6461	19.1857								F3	17.6328
F3	3	1	a2	5.04	0.0142583	0.6329	0.618642	0.1107	0.5222	1.13912	87.7873	45	0.1	450	30	5040	0.0198413	0.9	11.0513	57.6461	19.171								F3	19.2297
F3	3	1	b1	5.03	0.0142583	0.575	0.560742	0.1129	0.4621	1.13912	87.7873	45	0.1	450	30	5030	0.0198807	0.9	9.79887	57.6461	16.9983								F3	19.1857
F3	3	1	b1	5.03	0.0142583	0.5749	0.560642	0.1125	0.4624	1.13912	87.7873	45	0.1	450	30	5030	0.0198807	0.9	9.80523	57.6461	17.0094								F3	19.171
F3	3	1	b1	5.03	0.0142583	0.5744	0.560142	0.1124	0.462	1.13912	87.7873	45	0.1	450	30	5030	0.0198807	0.9	9.79675	57.6461	16.9947								F3	16.9983
F3	3	1	b2	5.03	0.0142583	0.6	0.585742	0.1066	0.4934	1.13912	87.7873	45	0.1	450	30	5030	0.0198807	0.9	10.4626	57.6461	18.1497								F3	17.0094
F3	3	1	b2	5.03	0.0142583	0.5994	0.585142	0.1071	0.4923	1.13912	87.7873	45	0.1	450	30	5030	0.0198807	0.9	10.4393	57.6461	18.1092								F3	16.9947
F3	3	1	b2	5.03	0.0142583	0.5989	0.584642	0.1062	0.4927	1.13912	87.7873	45	0.1	450	30	5030	0.0198807	0.9	10.4477	57.6461	18.124								F3	18.1497
F3	3	2	a1	5.06	0.0142583	0.5521	0.537842	0.1061	0.446	1.13912	87.7873	45	0.1	450	30	5060	0.0197628	0.9	9.4014	57.6461	16.3088								F3	18.1092
F3	3	2	a1	5.06	0.0142583	0.5525	0.538242	0.1064	0.4461	1.13912	87.7873	45	0.1	450	30	5060	0.0197628	0.9	9.40351	57.6461	16.3125								F3	18.124
F3	3	2	a1	5.06	0.0142583	0.5524	0.538142	0.1061	0.4463	1.13912	87.7873	45	0.1	450	30	5060	0.0197628	0.9	9.40772	57.6461	16.3198								F3	16.3088
F3	3	2	a2	5.06	0.0142583	0.6099	0.595642	0.0932	0.5167	1.13912	87.7873	45	0.1	450	30	5060	0.0197628	0.9	10.8917	57.6461	18.8941								F3	16.3125
F3	3	2	a2	5.06	0.0142583	0.6102	0.595942	0.0923	0.5179	1.13912	87.7873	45	0.1	450	30	5060	0.0197628	0.9	10.917	57.6461	18.938								F3	16.3198
F3	3	2	a2	5.06	0.0142583	0.6107	0.596442	0.0915	0.5192	1.13912	87.7873	45	0.1	450	30	5060	0.0197628	0.9	10.9444	57.6461	18.9855								F3	18.8941
F3	3	2	b1	5.05	0.0142583	0.5077	0.493442	0.0756	0.4321	1.13912	87.7873	45	0.1	450	30	5050	0.019802	0.9	9.12643	57.6461	15.8318								F3	18.938
F3	3	2	b1	5.05	0.0142583	0.5065	0.492242	0.076	0.4305	1.13912	87.7873	45	0.1	450	30	5050	0.019802	0.9	9.09264	57.6461	15.7732								F3	18.9855
F3	3	2	b1	5.05	0.0142583	0.5068	0.492542	0.0758	0.431	1.13912	87.7873	45	0.1	450	30	5050	0.019802	0.9	9.1032	57.6461	15.7915								F3	15.8318
F3	3	2	b2	5.05	0.0142583	0.5323	0.518042	0.0969	0.4354	1.13912	87.7873	45	0.1	450	30	5050	0.019802	0.9	9.19613	57.6461	15.9527								F3	15.7732
F3	3	2	b2	5.05	0.0142583	0.5316	0.517342	0.0969	0.4347	1.13912	87.7873	45	0.1	450	30	5050	0.019802	0.9	9.18135	57.6461	15.9271								F3	15.7915
F3	3	2	b2	5.05	0.0142583	0.532	0.517742	0.0977	0.4343	1.13912	87.7873	45	0.1	450	30	5050	0.019802	0.9	9.1729	57.6461	15.9124								F3	15.9527
F4	3	1	a1	5.05	0.0142583	0.479	0.464742	0.0866	0.3924	1.13912	87.7873	45	0.1	450	30	5050	0.019802	0.9	8.28792	57.4925	14.4157								F3	15.9271
F4	3	1	a1	5.05	0.0142583	0.4792	0.464942	0.0873	0.3919	1.13912	87.7873	45	0.1	450	30	5050	0.019802	0.9	8.27736	57.4925	14.3973								F3	15.9124
F4	3	1	a1	5.05	0.0142583	0.4789	0.464642	0.086	0.3929	1.13912	87.7873	45	0.1	450	30	5050	0.019802	0.9	8.29848	57.4925	14.434								F4	14.4157
F4	3	1	a2	5.05	0.0142583	0.5142	0.499942	0.083	0.4312	1.13912	87.7873	45	0.1	450	30	5050	0.019802	0.9	9.10742	57.4925	15.8411								F4	14.3973
F4	3	1	a2	5.05	0.0142583	0.5144	0.500142	0.0837	0.4307	1.13912	87.7873	45	0.1	450	30	5050	0.019802	0.9	9.09686	57.4925	15.8227								F4	14.434
F4	3	1	a2	5.05	0.0142583	0.5138	0.499542	0.084	0.4298	1.13912	87.7873	45	0.1	450	30	5050	0.019802	0.9	9.07785	57.4925	15.7896								F4	15.8411
F4	3	1	b1	5.04	0.0142583	0.505	0.490742	0.0933	0.4117	1.13912	87.7873	45	0.1	450	30	5040	0.0198413	0.9	8.71281	57.4925	15.1547								F4	15.8227
F4	3	1	b1	5.04	0.0142583	0.5056	0.491342	0.0933	0.4123	1.13912	87.7873	45	0.1	450	30	5040	0.0198413	0.9	8.72551	57.4925	15.1768								F4	15.7896
F4	3	1	b1	5.04	0.0142583	0.5051	0.490842	0.0932	0.4119	1.13912	87.7873	45	0.1	450	30	5040	0.0198413	0.9	8.71705	57.4925	15.1621								F4	15.1547
F4	3	1	b2	5.04	0.0142583	0.5368	0.522542	0.0736	0.4632	1.13912	87.7873	45	0.1	450	30	5040	0.0198413	0.9	9.80271	57.4925	17.0504								F4	15.1768
F4	3	1	b2	5.04	0.0142583	0.536	0.521742	0.0742	0.4618	1.13912	87.7873	45	0.1	450	30	5040	0.0198413	0.9	9.77308	57.4925	16.9989								F4	15.1621
F4	3	1	b2	5.04	0.0142583	0.5355	0.521242	0.0742	0.4613	1.13912	87.7873	45	0.1	450	30	5040	0.0198413	0.9	9.7625	57.4925	16.9805								F4	17.0504
F4	3	2	a1	5.06	0.0142583	0.5553	0.541042	0.0615	0.4938	1.13912	87.7873	45	0.1	450	30	5060	0.0197628	0.9	10.409	57.4925	18.105								F4	16.9989
F4	3	2	a1	5.06	0.0142583	0.5554	0.541142	0.0612	0.4942	1.13912	87.7873	45	0.1	450	30	5060	0.0197628	0.9	10.4174	57.4925	18.1196								F4	16.9805
F4	3	2	a1	5.06	0.0142583	0.5549	0.540642	0.0607	0.4942	1.13912	87.7873	45	0.1	450	30	5060	0.0197628	0.9	10.4174	57.4925	18.1196								F4	18.105
F4	3	2	a2	5.06	0.0142583	0.5794	0.565142	0.078	0.5014	1.13912	87.7873	45	0.1	450	30	5060	0.0197628	0.9	10.5692	57.4925	18.3836								F4	18.1196
F4	3	2	a2	5.06	0.0142583	0.5787	0.564442	0.077	0.5017	1.13912	87.7873	45	0.1	450	30	5060	0.0197628	0.9	10.5755	57.4925	18.3946								F4	18.1196
F4	3	2	a2	5.06	0.0142583	0.5788	0.564542	0.077	0.5018	1.13912	87.7873	45	0.1	450	30	5060	0.0197628	0.9	10.5776	57.4925	18.3983								F4	18.3836
F4	3	2	b1	5.03	0.0142583	0.4939	0.479642	0.0914	0.4025	1.13912	87.7873	45	0.1	450	30	5030	0.0198807	0.9	8.53505	57.4925	14.8455								F4	18.3946
F4	3	2	b1	5.03	0.0142583	0.4944	0.480142	0.0975	0.3969	1.13912	87.7873	45	0.1	450	30	5030	0.0198807	0.9	8.4163	57.4925	14.6389								F4	18.3983
F4	3	2	b1	5.03	0.0142583	0.498	0.483742	0.0854	0.4126	1.13912	87.7873	45	0.1	450	30	5030	0.0198807	0.9	8.74922	57.4925	15.218								F4	14.8455
F4	3	2	b2	5.03	0.0142583	0.5219	0.507642	0.1052	0.4167	1.13912	87.7873	45	0.1	450	30	5030	0.0198807	0.9	8.83616	57.4925	15.3692								F4	14.6389
F4	3	2	b2	5.03	0.0142583	0.5222	0.507942	0.1047	0.4175	1.13912	87.7873	45	0.1	450	30	5030	0.0198807	0.9	8.85312	57.4925	15.3987								F4	15.218
F4	3	2	b2	5.03	0.0142583	0.5218	0.507542	0.1052	0.4166	1.13912	87.7873	45	0.1	450	30	5030	0.0198807	0.9	8.83404	57.4925	15.3655								F4	15.3692
F5	3	1	a1	5.04	0.0142583	0.5295	0.515242	0.0915	0.438	1.13912	87.7873	45	0.1	450	30	5040	0.0198413	0.9	9.2694	62.9454	14.7261								F4	15.3987
F5	3	1	a1	5.04	0.0142583	0.528	0.513742	0.0926	0.4354	1.13912	87.7873	45	0.1	450	30	5040	0.0198413	0.9	9.21438	62.9454	14.6387								F4	15.3655
F5	3	1	a1	5.04	0.0142583	0.5297	0.515442	0.0932	0.4365	1.13912	87.7873	45	0.1	450	30	5040	0.0198413	0.9	9.23766	62.9454	14.6757								F5	14.7261
F5	3	1	a2	5.04	0.0142583	0.5413	0.527042	0.1121	0.4292	1.13912	87.7873	45	0.1	450	30	5040	0.0198413	0.9	9.08317	62.9454	14.4302								F5	14.6387
F5	3	1	a2	5.04	0.0142583	0.5438	0.529542	0.1119	0.4319	1.13912	87.7873	45	0.1	450	30	5040	0.0198413	0.9	9.14031	62.9454	14.521								F5	14.6757
F5	3	1	a2	5.04	0.0142583	0.5442	0.529942	0.1122	0.432	1.13912	87.7873	45	0.1	450	30	5040	0.0198413	0.9	9.14242	62.9454	14.5244								F5	14.4302
F5	3	1	b1	5.08	0.0142583	0.5258	0.511542	0.1164	0.4094	1.13912	87.7873	45	0.1	450	30	5080	0.019685	0.9	8.59592	62.9454	13.6561								F5	14.521
F5	3	1	b1	5.08	0.0142583	0.5263	0.512042	0.1154	0.4109	1.13912	87.7873	45	0.1	450	30	5080	0.019685	0.9	8.62741	62.9454	13.7062								F5	14.5244
F5	3	1	b1	5.08	0.0142583	0.5265	0.512242	0.1158	0.4107	1.13912	87.7873	45	0.1	450	30	5080	0.019685	0.9	8.62321	62.9454	13.6995								F5	13.6561
F5	3	1	b2	5.08	0.0142583	0.5694	0.555142	0.1085	0.4609	1.13912	87.7873	45	0.1	450	30	5080	0.019685	0.9	9.67723	62.9454	15.374								F5	13.7062
F5	3	1	b2	5.08	0.0142583	0.569	0.554742	0.1085	0.4605	1.13912	87.7873	45	0.1	450	30	5080	0.019685	0.9	9.66883	62.9454	15.3607								F5	13.6995
F5	3	1	b2	5.08	0.0142583	0.5686	0.554342	0.1086	0.46	1.13912	87.7873	45	0.1	450	30	5080	0.019685	0.9	9.65833	62.9454	15.344								F5	15.374
F5	3	2	a1	5.06	0.0142583	0.4836	0.469342	0.1055	0.3781	1.13912	87.7873	45	0.1	450	30	5060	0.0197628	0.9	7.97011	62.9454	12.6619								F5	15.3607
F5	3	2	a1	5.06	0.0142583	0.483	0.468742	0.1057	0.3773	1.13912	87.7873	45	0.1	450	30	5060	0.0197628	0.9	7.95324	62.9454	12.6351								F5	15.344
F5	3	2	a1	5.06	0.0142583	0.4843	0.470042	0.1046	0.3797	1.13912	87.7873	45	0.1	450	30	5060	0.0197628	0.9	8.00384	62.9454	12.7155								F5	12.6619
F5	3	2	a2	5.06	0.0142583	0.5045	0.490242	0.1051	0.3994	1.13912	87.7873	45	0.1	450	30	5060	0.0197628	0.9	8.4191	62.9454	13.3752								F5	12.6351
F5	3	2	a2	5.06	0.0142583	0.5041	0.489842	0.1042	0.3999	1.13912	87.7873	45	0.1	450	30	5060	0.0197628	0.9	8.42964	62.9454	13.392								F5	12.7155
F5	3	2	a2	5.06	0.0142583	0.5041	0.489842	0.1047	0.3994	1.13912	87.7873	45	0.1	450	30	5060	0.0197628	0.9	8.4191	62.9454	13.3752								F5	13.3752
F5	3	2	b1	5.05	0.0142583	0.5108	0.496542	0.1441	0.3667	1.13912	87.7873	45	0.1	450	30	5050	0.019802	0.9	7.74511	62.9454	12.3045								F5	13.392
F5	3	2	b1	5.05	0.0142583	0.5109	0.496642	0.1434	0.3675	1.13912	87.7873	45	0.1	450	30	5050	0.019802	0.9	7.76201	62.9454	12.3313								F5	13.3752
F5	3	2	b1	5.05	0.0142583	0.511	0.496742	0.1444	0.3666	1.13912	87.7873	45	0.1	450	30	5050	0.019802	0.9	7.743	62.9454	12.3011								F5	12.3045
F5	3	2	b2	5.05	0.0142583	0.4949	0.480642	0.1187	0.3762	1.13912	87.7873	45	0.1	450	30	5050	0.019802	0.9	7.94576	62.9454	12.6233								F5	12.3313
F5	3	2	b2	5.05	0.0142583	0.4951	0.480842	0.1175	0.3776	1.13912	87.7873	45	0.1	450	30	5050	0.019802	0.9	7.97533	62.9454	12.6702								F5	12.3011
F5	3	2	b2	5.05	0.0142583	0.4953	0.481042	0.1172	0.3781	1.13912	87.7873	45	0.1	450	30	5050	0.019802	0.9	7.98589	62.9454	12.687								F5	12.6233
F9	3	1	a1	5.03	0.0142583	0.4637	0.449442	0.0334	0.4303	1.13912	87.7873	45	0.1	450	30	5030	0.0198807	0.9	9.12455	47.4264	19.2394								F5	12.6702
F9	3	1	a1	5.03	0.0142583	0.466	0.451742	0.0329	0.4331	1.13912	87.7873	45	0.1	450	30	5030	0.0198807	0.9	9.18392	47.4264	19.3646								F5	12.687
F9	3	1	a1	5.03	0.0142583	0.4649	0.450642	0.0334	0.4315	1.13912	87.7873	45	0.1	450	30	5030	0.0198807	0.9	9.15	47.4264	19.293
F9	3	1	a2	5.03	0.0142583	0.4987	0.484442	0.0334	0.4653	1.13912	87.7873	45	0.1	450	30	5030	0.0198807	0.9	9.86673	47.4264	20.8043
F9	3	1	a2	5.03	0.0142583	0.4987	0.484442	0.0345	0.4642	1.13912	87.7873	45	0.1	450	30	5030	0.0198807	0.9	9.8434	47.4264	20.7551
F9	3	1	a2	5.03	0.0142583	0.4999	0.485642	0.0348	0.4651	1.13912	87.7873	45	0.1	450	30	5030	0.0198807	0.9	9.86249	47.4264	20.7954
F9	3	1	b1	5.04	0.0142583	0.4465	0.432242	0.0315	0.415	1.13912	87.7873	45	0.1	450	30	5040	0.0198413	0.9	8.78265	47.4264	18.5185
F9	3	1	b1	5.04	0.0142583	0.4468	0.432542	0.0319	0.4149	1.13912	87.7873	45	0.1	450	30	5040	0.0198413	0.9	8.78053	47.4264	18.514
F9	3	1	b1	5.04	0.0142583	0.4465	0.432242	0.0328	0.4137	1.13912	87.7873	45	0.1	450	30	5040	0.0198413	0.9	8.75514	47.4264	18.4605
F9	3	1	b2	5.04	0.0142583	0.4696	0.455342	0.0336	0.436	1.13912	87.7873	45	0.1	450	30	5040	0.0198413	0.9	9.22707	47.4264	19.4556
F9	3	1	b2	5.04	0.0142583	0.4693	0.455042	0.0339	0.4354	1.13912	87.7873	45	0.1	450	30	5040	0.0198413	0.9	9.21438	47.4264	19.4288
F9	3	1	b2	5.04	0.0142583	0.4694	0.455142	0.0337	0.4357	1.13912	87.7873	45	0.1	450	30	5040	0.0198413	0.9	9.22073	47.4264	19.4422
F9	3	2	a1	5.06	0.0142583	0.4712	0.456942	0.0284	0.4428	1.13912	87.7873	45	0.1	450	30	5060	0.0197628	0.9	9.33394	47.4264	19.6809
F9	3	2	a1	5.06	0.0142583	0.4708	0.456542	0.0281	0.4427	1.13912	87.7873	45	0.1	450	30	5060	0.0197628	0.9	9.33184	47.4264	19.6765
F9	3	2	a1	5.06	0.0142583	0.4706	0.456342	0.0289	0.4417	1.13912	87.7873	45	0.1	450	30	5060	0.0197628	0.9	9.31076	47.4264	19.632
F9	3	2	a2	5.06	0.0142583	0.4894	0.475142	0.0126	0.4768	1.13912	87.7873	45	0.1	450	30	5060	0.0197628	0.9	10.0506	47.4264	21.1921
F9	3	2	a2	5.06	0.0142583	0.4885	0.474242	0.0126	0.4759	1.13912	87.7873	45	0.1	450	30	5060	0.0197628	0.9	10.0317	47.4264	21.1521
F9	3	2	a2	5.06	0.0142583	0.4887	0.474442	0.0126	0.4761	1.13912	87.7873	45	0.1	450	30	5060	0.0197628	0.9	10.0359	47.4264	21.161
F9	3	2	b1	5.09	0.0142583	0.4682	0.453942	0.0122	0.456	1.13912	87.7873	45	0.1	450	30	5090	0.0196464	0.9	9.55554	47.4264	20.1481
F9	3	2	b1	5.09	0.0142583	0.4685	0.454242	0.0116	0.4569	1.13912	87.7873	45	0.1	450	30	5090	0.0196464	0.9	9.5744	47.4264	20.1879
F9	3	2	b1	5.09	0.0142583	0.4681	0.453842	0.0119	0.4562	1.13912	87.7873	45	0.1	450	30	5090	0.0196464	0.9	9.55973	47.4264	20.157
F9	3	2	b2	5.09	0.0142583	0.4922	0.477942	0.0245	0.4677	1.13912	87.7873	45	0.1	450	30	5090	0.0196464	0.9	9.80071	47.4264	20.6651
F9	3	2	b2	5.09	0.0142583	0.4916	0.477342	0.0248	0.4668	1.13912	87.7873	45	0.1	450	30	5090	0.0196464	0.9	9.78185	47.4264	20.6253
F9	3	2	b2	5.09	0.0142583	0.4912	0.476942	0.0238	0.4674	1.13912	87.7873	45	0.1	450	30	5090	0.0196464	0.9	9.79443	47.4264	20.6518
F12	3	1	a1	5.02	0.0142583	0.544	0.529742	0.0825	0.4615	1.13912	87.7873	45	0.1	450	30	5020	0.0199203	0.9	9.80564	48.2897	20.3059
F12	3	1	a1	5.02	0.0142583	0.5442	0.529942	0.0824	0.4618	1.13912	87.7873	45	0.1	450	30	5020	0.0199203	0.9	9.81202	48.2897	20.3191
F12	3	1	a1	5.02	0.0142583	0.5447	0.530442	0.0829	0.4618	1.13912	87.7873	45	0.1	450	30	5020	0.0199203	0.9	9.81202	48.2897	20.3191
F12	3	1	a2	5.02	0.0142583	0.5849	0.570642	0.0881	0.4968	1.13912	87.7873	45	0.1	450	30	5020	0.0199203	0.9	10.5557	48.2897	21.8591
F12	3	1	a2	5.02	0.0142583	0.5858	0.571542	0.0889	0.4969	1.13912	87.7873	45	0.1	450	30	5020	0.0199203	0.9	10.5578	48.2897	21.8635
F12	3	1	a2	5.02	0.0142583	0.5858	0.571542	0.089	0.4968	1.13912	87.7873	45	0.1	450	30	5020	0.0199203	0.9	10.5557	48.2897	21.8591
F12	3	1	b1	5.07	0.0142583	0.5777	0.563442	0.0639	0.5138	1.13912	87.7873	45	0.1	450	30	5070	0.0197239	0.9	10.8092	48.2897	22.3841
F12	3	1	b1	5.07	0.0142583	0.5773	0.563042	0.0683	0.509	1.13912	87.7873	45	0.1	450	30	5070	0.0197239	0.9	10.7082	48.2897	22.175
F12	3	1	b1	5.07	0.0142583	0.5775	0.563242	0.0627	0.5148	1.13912	87.7873	45	0.1	450	30	5070	0.0197239	0.9	10.8303	48.2897	22.4277
F12	3	1	b2	5.07	0.0142583	0.5943	0.580042	0.0738	0.5205	1.13912	87.7873	45	0.1	450	30	5070	0.0197239	0.9	10.9502	48.2897	22.676
F12	3	1	b2	5.07	0.0142583	0.5947	0.580442	0.0735	0.5212	1.13912	87.7873	45	0.1	450	30	5070	0.0197239	0.9	10.9649	48.2897	22.7065
F12	3	1	b2	5.07	0.0142583	0.5944	0.580142	0.0732	0.5212	1.13912	87.7873	45	0.1	450	30	5070	0.0197239	0.9	10.9649	48.2897	22.7065
F12	3	2	a1	5.05	0.0142583	0.5297	0.515442	0.0633	0.4664	1.13912	87.7873	45	0.1	450	30	5050	0.019802	0.9	9.85088	48.2897	20.3996
F12	3	2	a1	5.05	0.0142583	0.5288	0.514542	0.0623	0.4665	1.13912	87.7873	45	0.1	450	30	5050	0.019802	0.9	9.853	48.2897	20.4039
F12	3	2	a1	5.05	0.0142583	0.5287	0.514442	0.0625	0.4662	1.13912	87.7873	45	0.1	450	30	5050	0.019802	0.9	9.84666	48.2897	20.3908
F12	3	2	a2	5.05	0.0142583	0.5481	0.533842	0.0786	0.4695	1.13912	87.7873	45	0.1	450	30	5050	0.019802	0.9	9.91636	48.2897	20.5352
F12	3	2	a2	5.05	0.0142583	0.548	0.533742	0.0789	0.4691	1.13912	87.7873	45	0.1	450	30	5050	0.019802	0.9	9.90791	48.2897	20.5177
F12	3	2	a2	5.05	0.0142583	0.5481	0.533842	0.0792	0.4689	1.13912	87.7873	45	0.1	450	30	5050	0.019802	0.9	9.90369	48.2897	20.5089
F12	3	2	b1	5.04	0.0142583	0.5596	0.545342	0.0798	0.4798	1.13912	87.7873	45	0.1	450	30	5040	0.0198413	0.9	10.154	48.2897	21.0273
F12	3	2	b1	5.04	0.0142583	0.5597	0.545442	0.08	0.4797	1.13912	87.7873	45	0.1	450	30	5040	0.0198413	0.9	10.1519	48.2897	21.0229
F12	3	2	b1	5.04	0.0142583	0.5593	0.545042	0.0797	0.4796	1.13912	87.7873	45	0.1	450	30	5040	0.0198413	0.9	10.1498	48.2897	21.0185
F12	3	2	b2	5.04	0.0142583	0.5826	0.568342	0.0642	0.5184	1.13912	87.7873	45	0.1	450	30	5040	0.0198413	0.9	10.9709	48.2897	22.7189
F12	3	2	b2	5.04	0.0142583	0.5818	0.567542	0.0636	0.5182	1.13912	87.7873	45	0.1	450	30	5040	0.0198413	0.9	10.9667	48.2897	22.7102
F12	3	2	b2	5.04	0.0142583	0.584	0.569742	0.0644	0.5196	1.13912	87.7873	45	0.1	450	30	5040	0.0198413	0.9	10.9963	48.2897	22.7715
F18	3	1	a1	5.04	0.0142583	0.5501	0.535842	0.1034	0.4467	1.13912	87.7873	45	0.1	450	30	5040	0.0198413	0.9	9.45352	53.909	17.5361
F18	3	1	a1	5.04	0.0142583	0.5507	0.536442	0.1032	0.4475	1.13912	87.7873	45	0.1	450	30	5040	0.0198413	0.9	9.47045	53.909	17.5675
F18	3	1	a1	5.04	0.0142583	0.5502	0.535942	0.1032	0.447	1.13912	87.7873	45	0.1	450	30	5040	0.0198413	0.9	9.45987	53.909	17.5479
F18	3	1	a2	5.04	0.0142583	0.5839	0.569642	0.1039	0.48	1.13912	87.7873	45	0.1	450	30	5040	0.0198413	0.9	10.1582	53.909	18.8433
F18	3	1	a2	5.04	0.0142583	0.5836	0.569342	0.1029	0.4807	1.13912	87.7873	45	0.1	450	30	5040	0.0198413	0.9	10.1731	53.909	18.8708
F18	3	1	a2	5.04	0.0142583	0.5826	0.568342	0.1025	0.4801	1.13912	87.7873	45	0.1	450	30	5040	0.0198413	0.9	10.1604	53.909	18.8473
F18	3	1	b1	5.05	0.0142583	0.5826	0.568342	0.0566	0.526	1.13912	87.7873	45	0.1	450	30	5050	0.019802	0.9	11.1097	53.909	20.6083
F18	3	1	b1	5.05	0.0142583	0.5802	0.565942	0.0562	0.524	1.13912	87.7873	45	0.1	450	30	5050	0.019802	0.9	11.0675	53.909	20.5299
F18	3	1	b1	5.05	0.0142583	0.5806	0.566342	0.0569	0.5237	1.13912	87.7873	45	0.1	450	30	5050	0.019802	0.9	11.0611	53.909	20.5182
F18	3	1	b2	5.05	0.0142583	0.6151	0.600842	0.055	0.5601	1.13912	87.7873	45	0.1	450	30	5050	0.019802	0.9	11.8299	53.909	21.9443
F18	3	1	b2	5.05	0.0142583	0.6156	0.601342	0.055	0.5606	1.13912	87.7873	45	0.1	450	30	5050	0.019802	0.9	11.8405	53.909	21.9639
F18	3	1	b2	5.05	0.0142583	0.6157	0.601442	0.059	0.5567	1.13912	87.7873	45	0.1	450	30	5050	0.019802	0.9	11.7581	53.909	21.8111
F18	3	2	a1	5.05	0.0142583	0.5567	0.542442	0.0905	0.4662	1.13912	87.7873	45	0.1	450	30	5050	0.019802	0.9	9.84666	53.909	18.2654
F18	3	2	a1	5.05	0.0142583	0.5557	0.541442	0.0893	0.4664	1.13912	87.7873	45	0.1	450	30	5050	0.019802	0.9	9.85088	53.909	18.2732
F18	3	2	a1	5.05	0.0142583	0.5565	0.542242	0.0898	0.4667	1.13912	87.7873	45	0.1	450	30	5050	0.019802	0.9	9.85722	53.909	18.2849
F18	3	2	a2	5.05	0.0142583	0.5632	0.548942	0.0902	0.473	1.13912	87.7873	45	0.1	450	30	5050	0.019802	0.9	9.99028	53.909	18.5318
F18	3	2	a2	5.05	0.0142583	0.5635	0.549242	0.09	0.4735	1.13912	87.7873	45	0.1	450	30	5050	0.019802	0.9	10.0008	53.909	18.5514
F18	3	2	a2	5.05	0.0142583	0.563	0.548742	0.0899	0.4731	1.13912	87.7873	45	0.1	450	30	5050	0.019802	0.9	9.9924	53.909	18.5357
F18	3	2	b1	5.08	0.0142583	0.5677	0.553442	0.1178	0.4499	1.13912	87.7873	45	0.1	450	30	5080	0.019685	0.9	9.44627	53.909	17.5226
F18	3	2	b1	5.08	0.0142583	0.568	0.553742	0.1183	0.4497	1.13912	87.7873	45	0.1	450	30	5080	0.019685	0.9	9.44207	53.909	17.5148
F18	3	2	b1	5.08	0.0142583	0.5696	0.555342	0.1181	0.4515	1.13912	87.7873	45	0.1	450	30	5080	0.019685	0.9	9.47986	53.909	17.585
F18	3	2	b2	5.08	0.0142583	0.6409	0.626642	0.1155	0.5254	1.13912	87.7873	45	0.1	450	30	5080	0.019685	0.9	11.0315	53.909	20.4632
F18	3	2	b2	5.08	0.0142583	0.6416	0.627342	0.1148	0.5268	1.13912	87.7873	45	0.1	450	30	5080	0.019685	0.9	11.0609	53.909	20.5177
F18	3	2	b2	5.08	0.0142583	0.6422	0.627942	0.1144	0.5278	1.13912	87.7873	45	0.1	450	30	5080	0.019685	0.9	11.0819	53.909	20.5567

## Sheet: Gopod S4
sample ID	Sampling	Batch	replication	Sample weight (g)	A510 blank	A510 sample	Asample-Ablank	Acontrol	Asample-Acontrol (ΔA)	A510 glucose STD	F (100µg glucose/A STD)	Extraction volume (mL)	Volume analized (mL)	Extraction V/Analized V	Dilutions	Sample weight (mg)	100/sample weight	162/180	dig. starch %	wet tot. starch %	dig/tot %		g/100g total starch
F1	4	1	a1	5.09	0.0142583	0.6398	0.625542	0.0148	0.625	1.13912	87.7873	45	0.1	450	30	5090	0.0196464	0.9	13.097	61.2394	21.3865		Sampling 4	Mean	SD
F1	4	1	a1	5.09	0.0142583	0.6395	0.625242	0.0145	0.625	1.13912	87.7873	45	0.1	450	30	5090	0.0196464	0.9	13.097	61.2394	21.3865		1	19.706	2.17936				S4	starch dig
F1	4	1	a1	5.09	0.0142583	0.6396	0.625342	0.0151	0.6245	1.13912	87.7873	45	0.1	450	30	5090	0.0196464	0.9	13.0865	61.2394	21.3694		3	21.2621	1.18358				F1	21.3865
F1	4	1	a2	5.09	0.0142583	0.6724	0.658142	0.0289	0.6435	1.13912	87.7873	45	0.1	450	30	5090	0.0196464	0.9	13.4846	61.2394	22.0195		4	17.4799	1.89495				F1	21.3865
F1	4	1	a2	5.09	0.0142583	0.6717	0.657442	0.0283	0.6434	1.13912	87.7873	45	0.1	450	30	5090	0.0196464	0.9	13.4825	61.2394	22.0161		5	15.592	1.47568				F1	21.3694
F1	4	1	a2	5.09	0.0142583	0.6719	0.657642	0.0286	0.6433	1.13912	87.7873	45	0.1	450	30	5090	0.0196464	0.9	13.4804	61.2394	22.0127		9	21.4541	1.12815				F1	22.0195
F1	4	1	b1	5.06	0.0142583	0.5998	0.585542	0.0249	0.5749	1.13912	87.7873	45	0.1	450	30	5060	0.0197628	0.9	12.1185	61.2394	19.7888		12	23.7928	2.51256				F1	22.0161
F1	4	1	b1	5.06	0.0142583	0.601	0.586742	0.0243	0.5767	1.13912	87.7873	45	0.1	450	30	5060	0.0197628	0.9	12.1565	61.2394	19.8507		18	22.2559	1.91559				F1	22.0127
F1	4	1	b1	5.06	0.0142583	0.6007	0.586442	0.0253	0.5754	1.13912	87.7873	45	0.1	450	30	5060	0.0197628	0.9	12.1291	61.2394	19.806								F1	19.7888
F1	4	1	b2	5.06	0.0142583	0.6489	0.634642	0.0294	0.6195	1.13912	87.7873	45	0.1	450	30	5060	0.0197628	0.9	13.0587	61.2394	21.324								F1	19.8507
F1	4	1	b2	5.06	0.0142583	0.6493	0.635042	0.0301	0.6192	1.13912	87.7873	45	0.1	450	30	5060	0.0197628	0.9	13.0523	61.2394	21.3136		g/100g porridge						F1	19.806
F1	4	1	b2	5.06	0.0142583	0.6477	0.633442	0.0299	0.6178	1.13912	87.7873	45	0.1	450	30	5060	0.0197628	0.9	13.0228	61.2394	21.2654		Sampling 4	Mean	SD				F1	21.324
F1	4	2	a1	5.03	0.0142583	0.5586	0.544342	0.0419	0.5167	1.13912	87.7873	45	0.1	450	30	5030	0.0198807	0.9	10.9567	61.2394	17.8915		1	11.8418	1.21989				F1	21.3136
F1	4	2	a1	5.03	0.0142583	0.5581	0.543842	0.0416	0.5165	1.13912	87.7873	45	0.1	450	30	5030	0.0198807	0.9	10.9524	61.2394	17.8846		3	12.2568	0.682285				F1	21.2654
F1	4	2	a1	5.03	0.0142583	0.5579	0.543642	0.0416	0.5163	1.13912	87.7873	45	0.1	450	30	5030	0.0198807	0.9	10.9482	61.2394	17.8777		4	10.0496	1.08946				F1	17.8915
F1	4	2	a2	5.03	0.0142583	0.5816	0.567342	0.0458	0.5358	1.13912	87.7873	45	0.1	450	30	5030	0.0198807	0.9	11.3617	61.2394	18.5529		5	9.81444	0.928872				F1	17.8846
F1	4	2	a2	5.03	0.0142583	0.5825	0.568242	0.0461	0.5364	1.13912	87.7873	45	0.1	450	30	5030	0.0198807	0.9	11.3744	61.2394	18.5737		9	10.1749	0.53504				F1	17.8777
F1	4	2	a2	5.03	0.0142583	0.5829	0.568642	0.0458	0.5371	1.13912	87.7873	45	0.1	450	30	5030	0.0198807	0.9	11.3893	61.2394	18.5979		12	11.4895	1.21331				F1	18.5529
F1	4	2	b1	5.03	0.0142583	0.511	0.496742	0.0285	0.4825	1.13912	87.7873	45	0.1	450	30	5030	0.0198807	0.9	10.2315	61.2394	16.7073		18	11.9979	1.03267				F1	18.5737
F1	4	2	b1	5.03	0.0142583	0.5106	0.496342	0.0279	0.4827	1.13912	87.7873	45	0.1	450	30	5030	0.0198807	0.9	10.2357	61.2394	16.7142								F1	18.5979
F1	4	2	b1	5.03	0.0142583	0.5122	0.497942	0.0272	0.485	1.13912	87.7873	45	0.1	450	30	5030	0.0198807	0.9	10.2845	61.2394	16.7939								F1	16.7073
F1	4	2	b2	5.03	0.0142583	0.5338	0.519542	0.0438	0.49	1.13912	87.7873	45	0.1	450	30	5030	0.0198807	0.9	10.3905	61.2394	16.967								F1	16.7142
F1	4	2	b2	5.03	0.0142583	0.5341	0.519842	0.043	0.4911	1.13912	87.7873	45	0.1	450	30	5030	0.0198807	0.9	10.4138	61.2394	17.0051								F1	16.7939
F1	4	2	b2	5.03	0.0142583	0.5334	0.519142	0.043	0.4904	1.13912	87.7873	45	0.1	450	30	5030	0.0198807	0.9	10.399	61.2394	16.9808								F1	16.967
F3	4	1	a1	5.04	0.0142583	0.6933	0.679042	0.1095	0.5838	1.13912	87.7873	45	0.1	450	30	5040	0.0198413	0.9	12.355	57.6461	21.4325								F1	17.0051
F3	4	1	a1	5.04	0.0142583	0.694	0.679742	0.109	0.585	1.13912	87.7873	45	0.1	450	30	5040	0.0198413	0.9	12.3804	57.6461	21.4765								F1	16.9808
F3	4	1	a1	5.04	0.0142583	0.6942	0.679942	0.1084	0.5858	1.13912	87.7873	45	0.1	450	30	5040	0.0198413	0.9	12.3973	57.6461	21.5059								F3	21.4325
F3	4	1	a2	5.04	0.0142583	0.7512	0.736942	0.1102	0.641	1.13912	87.7873	45	0.1	450	30	5040	0.0198413	0.9	13.5655	57.6461	23.5324								F3	21.4765
F3	4	1	a2	5.04	0.0142583	0.7504	0.736142	0.1106	0.6398	1.13912	87.7873	45	0.1	450	30	5040	0.0198413	0.9	13.5401	57.6461	23.4883								F3	21.5059
F3	4	1	a2	5.04	0.0142583	0.7507	0.736442	0.1107	0.64	1.13912	87.7873	45	0.1	450	30	5040	0.0198413	0.9	13.5443	57.6461	23.4957								F3	23.5324
F3	4	1	b1	5.03	0.0142583	0.6511	0.636842	0.1129	0.5382	1.13912	87.7873	45	0.1	450	30	5030	0.0198807	0.9	11.4126	57.6461	19.7977								F3	23.4883
F3	4	1	b1	5.03	0.0142583	0.6504	0.636142	0.1125	0.5379	1.13912	87.7873	45	0.1	450	30	5030	0.0198807	0.9	11.4062	57.6461	19.7866								F3	23.4957
F3	4	1	b1	5.03	0.0142583	0.65	0.635742	0.1124	0.5376	1.13912	87.7873	45	0.1	450	30	5030	0.0198807	0.9	11.3999	57.6461	19.7756								F3	19.7977
F3	4	1	b2	5.03	0.0142583	0.6896	0.675342	0.1066	0.583	1.13912	87.7873	45	0.1	450	30	5030	0.0198807	0.9	12.3626	57.6461	21.4456								F3	19.7866
F3	4	1	b2	5.03	0.0142583	0.6913	0.677042	0.1071	0.5842	1.13912	87.7873	45	0.1	450	30	5030	0.0198807	0.9	12.388	57.6461	21.4898								F3	19.7756
F3	4	1	b2	5.03	0.0142583	0.6911	0.676842	0.1062	0.5849	1.13912	87.7873	45	0.1	450	30	5030	0.0198807	0.9	12.4029	57.6461	21.5155								F3	21.4456
F3	4	2	a1	5.06	0.0142583	0.6641	0.649842	0.1061	0.558	1.13912	87.7873	45	0.1	450	30	5060	0.0197628	0.9	11.7623	57.6461	20.4043								F3	21.4898
F3	4	2	a1	5.06	0.0142583	0.6635	0.649242	0.1064	0.5571	1.13912	87.7873	45	0.1	450	30	5060	0.0197628	0.9	11.7433	57.6461	20.3714								F3	21.5155
F3	4	2	a1	5.06	0.0142583	0.6637	0.649442	0.1061	0.5576	1.13912	87.7873	45	0.1	450	30	5060	0.0197628	0.9	11.7539	57.6461	20.3897								F3	20.4043
F3	4	2	a2	5.06	0.0142583	0.707	0.692742	0.0932	0.6138	1.13912	87.7873	45	0.1	450	30	5060	0.0197628	0.9	12.9385	57.6461	22.4448								F3	20.3714
F3	4	2	a2	5.06	0.0142583	0.707	0.692742	0.0923	0.6147	1.13912	87.7873	45	0.1	450	30	5060	0.0197628	0.9	12.9575	57.6461	22.4777								F3	20.3897
F3	4	2	a2	5.06	0.0142583	0.7066	0.692342	0.0915	0.6151	1.13912	87.7873	45	0.1	450	30	5060	0.0197628	0.9	12.9659	57.6461	22.4923								F3	22.4448
F3	4	2	b1	5.05	0.0142583	0.632	0.617742	0.0756	0.5564	1.13912	87.7873	45	0.1	450	30	5050	0.019802	0.9	11.7518	57.6461	20.3861								F3	22.4777
F3	4	2	b1	5.05	0.0142583	0.6318	0.617542	0.076	0.5558	1.13912	87.7873	45	0.1	450	30	5050	0.019802	0.9	11.7391	57.6461	20.3641								F3	22.4923
F3	4	2	b1	5.05	0.0142583	0.6316	0.617342	0.0758	0.5558	1.13912	87.7873	45	0.1	450	30	5050	0.019802	0.9	11.7391	57.6461	20.3641								F3	20.3861
F3	4	2	b2	5.05	0.0142583	0.6599	0.645642	0.0969	0.563	1.13912	87.7873	45	0.1	450	30	5050	0.019802	0.9	11.8912	57.6461	20.6279								F3	20.3641
F3	4	2	b2	5.05	0.0142583	0.6601	0.645842	0.0969	0.5632	1.13912	87.7873	45	0.1	450	30	5050	0.019802	0.9	11.8954	57.6461	20.6353								F3	20.3641
F3	4	2	b2	5.05	0.0142583	0.6597	0.645442	0.0977	0.562	1.13912	87.7873	45	0.1	450	30	5050	0.019802	0.9	11.8701	57.6461	20.5913								F3	20.6279
F4	4	1	a1	5.05	0.0142583	0.5766	0.562342	0.0866	0.49	1.13912	87.7873	45	0.1	450	30	5050	0.019802	0.9	10.3493	57.4925	18.0012								F3	20.6353
F4	4	1	a1	5.05	0.0142583	0.5771	0.562842	0.0873	0.4898	1.13912	87.7873	45	0.1	450	30	5050	0.019802	0.9	10.3451	57.4925	17.9939								F3	20.5913
F4	4	1	a1	5.05	0.0142583	0.5777	0.563442	0.086	0.4917	1.13912	87.7873	45	0.1	450	30	5050	0.019802	0.9	10.3852	57.4925	18.0637								F4	18.0012
F4	4	1	a2	5.05	0.0142583	0.6195	0.605242	0.083	0.5365	1.13912	87.7873	45	0.1	450	30	5050	0.019802	0.9	11.3315	57.4925	19.7095								F4	17.9939
F4	4	1	a2	5.05	0.0142583	0.6198	0.605542	0.0837	0.5361	1.13912	87.7873	45	0.1	450	30	5050	0.019802	0.9	11.323	57.4925	19.6948								F4	18.0637
F4	4	1	a2	5.05	0.0142583	0.62	0.605742	0.084	0.536	1.13912	87.7873	45	0.1	450	30	5050	0.019802	0.9	11.3209	57.4925	19.6911								F4	19.7095
F4	4	1	b1	5.04	0.0142583	0.4928	0.478542	0.0933	0.3995	1.13912	87.7873	45	0.1	450	30	5040	0.0198413	0.9	8.45462	57.4925	14.7056								F4	19.6948
F4	4	1	b1	5.04	0.0142583	0.4922	0.477942	0.0933	0.3989	1.13912	87.7873	45	0.1	450	30	5040	0.0198413	0.9	8.44193	57.4925	14.6835								F4	19.6911
F4	4	1	b1	5.04	0.0142583	0.4926	0.478342	0.0932	0.3994	1.13912	87.7873	45	0.1	450	30	5040	0.0198413	0.9	8.45251	57.4925	14.7019								F4	14.7056
F4	4	1	b2	5.04	0.0142583	0.5162	0.501942	0.0736	0.4426	1.13912	87.7873	45	0.1	450	30	5040	0.0198413	0.9	9.36675	57.4925	16.2921								F4	14.6835
F4	4	1	b2	5.04	0.0142583	0.5161	0.501842	0.0742	0.4419	1.13912	87.7873	45	0.1	450	30	5040	0.0198413	0.9	9.35194	57.4925	16.2664								F4	14.7019
F4	4	1	b2	5.04	0.0142583	0.5169	0.502642	0.0742	0.4427	1.13912	87.7873	45	0.1	450	30	5040	0.0198413	0.9	9.36887	57.4925	16.2958								F4	16.2921
F4	4	2	a1	5.06	0.0142583	0.5955	0.581242	0.0615	0.534	1.13912	87.7873	45	0.1	450	30	5060	0.0197628	0.9	11.2564	57.4925	19.5789								F4	16.2664
F4	4	2	a1	5.06	0.0142583	0.5953	0.581042	0.0612	0.5341	1.13912	87.7873	45	0.1	450	30	5060	0.0197628	0.9	11.2585	57.4925	19.5825								F4	16.2958
F4	4	2	a1	5.06	0.0142583	0.596	0.581742	0.0607	0.5353	1.13912	87.7873	45	0.1	450	30	5060	0.0197628	0.9	11.2838	57.4925	19.6265								F4	19.5789
F4	4	2	a2	5.06	0.0142583	0.6104	0.596142	0.078	0.5324	1.13912	87.7873	45	0.1	450	30	5060	0.0197628	0.9	11.2227	57.4925	19.5202								F4	19.5825
F4	4	2	a2	5.06	0.0142583	0.6103	0.596042	0.077	0.5333	1.13912	87.7873	45	0.1	450	30	5060	0.0197628	0.9	11.2416	57.4925	19.5532								F4	19.6265
F4	4	2	a2	5.06	0.0142583	0.6097	0.595442	0.077	0.5327	1.13912	87.7873	45	0.1	450	30	5060	0.0197628	0.9	11.229	57.4925	19.5312								F4	19.5202
F4	4	2	b1	5.03	0.0142583	0.5217	0.507442	0.0914	0.4303	1.13912	87.7873	45	0.1	450	30	5030	0.0198807	0.9	9.12455	57.4925	15.8708								F4	19.5532
F4	4	2	b1	5.03	0.0142583	0.5212	0.506942	0.0975	0.4237	1.13912	87.7873	45	0.1	450	30	5030	0.0198807	0.9	8.9846	57.4925	15.6274								F4	19.5312
F4	4	2	b1	5.03	0.0142583	0.5185	0.504242	0.0854	0.4331	1.13912	87.7873	45	0.1	450	30	5030	0.0198807	0.9	9.18392	57.4925	15.9741								F4	15.8708
F4	4	2	b2	5.03	0.0142583	0.5442	0.529942	0.1052	0.439	1.13912	87.7873	45	0.1	450	30	5030	0.0198807	0.9	9.30903	57.4925	16.1917								F4	15.6274
F4	4	2	b2	5.03	0.0142583	0.5434	0.529142	0.1047	0.4387	1.13912	87.7873	45	0.1	450	30	5030	0.0198807	0.9	9.30267	57.4925	16.1807								F4	15.9741
F4	4	2	b2	5.03	0.0142583	0.5439	0.529642	0.1052	0.4387	1.13912	87.7873	45	0.1	450	30	5030	0.0198807	0.9	9.30267	57.4925	16.1807								F4	16.1917
F5	4	1	a1	5.04	0.0142583	0.5832	0.568942	0.0915	0.4917	1.13912	87.7873	45	0.1	450	30	5040	0.0198413	0.9	10.4059	62.9454	16.5316								F4	16.1807
F5	4	1	a1	5.04	0.0142583	0.583	0.568742	0.0926	0.4904	1.13912	87.7873	45	0.1	450	30	5040	0.0198413	0.9	10.3783	62.9454	16.4878								F4	16.1807
F5	4	1	a1	5.04	0.0142583	0.5831	0.568842	0.0932	0.4899	1.13912	87.7873	45	0.1	450	30	5040	0.0198413	0.9	10.3678	62.9454	16.471								F5	16.5316
F5	4	1	a2	5.04	0.0142583	0.5997	0.585442	0.1121	0.4876	1.13912	87.7873	45	0.1	450	30	5040	0.0198413	0.9	10.3191	62.9454	16.3937								F5	16.4878
F5	4	1	a2	5.04	0.0142583	0.5992	0.584942	0.1119	0.4873	1.13912	87.7873	45	0.1	450	30	5040	0.0198413	0.9	10.3127	62.9454	16.3836								F5	16.471
F5	4	1	a2	5.04	0.0142583	0.5984	0.584142	0.1122	0.4862	1.13912	87.7873	45	0.1	450	30	5040	0.0198413	0.9	10.2895	62.9454	16.3466								F5	16.3937
F5	4	1	b1	5.08	0.0142583	0.5617	0.547442	0.1164	0.4453	1.13912	87.7873	45	0.1	450	30	5080	0.019685	0.9	9.34969	62.9454	14.8536								F5	16.3836
F5	4	1	b1	5.08	0.0142583	0.5628	0.548542	0.1154	0.4474	1.13912	87.7873	45	0.1	450	30	5080	0.019685	0.9	9.39378	62.9454	14.9237								F5	16.3466
F5	4	1	b1	5.08	0.0142583	0.5642	0.549942	0.1158	0.4484	1.13912	87.7873	45	0.1	450	30	5080	0.019685	0.9	9.41478	62.9454	14.957								F5	14.8536
F5	4	1	b2	5.08	0.0142583	0.6568	0.642542	0.1085	0.5483	1.13912	87.7873	45	0.1	450	30	5080	0.019685	0.9	11.5123	62.9454	18.2894								F5	14.9237
F5	4	1	b2	5.08	0.0142583	0.6537	0.639442	0.1085	0.5452	1.13912	87.7873	45	0.1	450	30	5080	0.019685	0.9	11.4472	62.9454	18.186								F5	14.957
F5	4	1	b2	5.08	0.0142583	0.6548	0.640542	0.1086	0.5462	1.13912	87.7873	45	0.1	450	30	5080	0.019685	0.9	11.4682	62.9454	18.2193								F5	18.2894
F5	4	2	a1	5.06	0.0142583	0.508	0.493742	0.1055	0.4025	1.13912	87.7873	45	0.1	450	30	5060	0.0197628	0.9	8.48445	62.9454	13.4791								F5	18.186
F5	4	2	a1	5.06	0.0142583	0.5088	0.494542	0.1057	0.4031	1.13912	87.7873	45	0.1	450	30	5060	0.0197628	0.9	8.49709	62.9454	13.4991								F5	18.2193
F5	4	2	a1	5.06	0.0142583	0.5087	0.494442	0.1046	0.4041	1.13912	87.7873	45	0.1	450	30	5060	0.0197628	0.9	8.51817	62.9454	13.5326								F5	13.4791
F5	4	2	a2	5.06	0.0142583	0.5842	0.569942	0.1051	0.4791	1.13912	87.7873	45	0.1	450	30	5060	0.0197628	0.9	10.0991	62.9454	16.0443								F5	13.4991
F5	4	2	a2	5.06	0.0142583	0.5837	0.569442	0.1042	0.4795	1.13912	87.7873	45	0.1	450	30	5060	0.0197628	0.9	10.1076	62.9454	16.0577								F5	13.5326
F5	4	2	a2	5.06	0.0142583	0.584	0.569742	0.1047	0.4793	1.13912	87.7873	45	0.1	450	30	5060	0.0197628	0.9	10.1033	62.9454	16.051								F5	16.0443
F5	4	2	b1	5.05	0.0142583	0.5557	0.541442	0.1441	0.4116	1.13912	87.7873	45	0.1	450	30	5050	0.019802	0.9	8.69345	62.9454	13.8111								F5	16.0577
F5	4	2	b1	5.05	0.0142583	0.5554	0.541142	0.1434	0.412	1.13912	87.7873	45	0.1	450	30	5050	0.019802	0.9	8.7019	62.9454	13.8245								F5	16.051
F5	4	2	b1	5.05	0.0142583	0.5548	0.540542	0.1444	0.4104	1.13912	87.7873	45	0.1	450	30	5050	0.019802	0.9	8.6681	62.9454	13.7708								F5	13.8111
F5	4	2	b2	5.05	0.0142583	0.5757	0.561442	0.1187	0.457	1.13912	87.7873	45	0.1	450	30	5050	0.019802	0.9	9.65235	62.9454	15.3345								F5	13.8245
F5	4	2	b2	5.05	0.0142583	0.5756	0.561342	0.1175	0.4581	1.13912	87.7873	45	0.1	450	30	5050	0.019802	0.9	9.67558	62.9454	15.3714								F5	13.7708
F5	4	2	b2	5.05	0.0142583	0.5758	0.561542	0.1172	0.4586	1.13912	87.7873	45	0.1	450	30	5050	0.019802	0.9	9.68614	62.9454	15.3882								F5	15.3345
F9	4	1	a1	5.03	0.0142583	0.5264	0.512142	0.0334	0.493	1.13912	87.7873	45	0.1	450	30	5030	0.0198807	0.9	10.4541	47.4264	22.0428								F5	15.3714
F9	4	1	a1	5.03	0.0142583	0.5267	0.512442	0.0329	0.4938	1.13912	87.7873	45	0.1	450	30	5030	0.0198807	0.9	10.4711	47.4264	22.0786								F5	15.3882
F9	4	1	a1	5.03	0.0142583	0.5263	0.512042	0.0334	0.4929	1.13912	87.7873	45	0.1	450	30	5030	0.0198807	0.9	10.452	47.4264	22.0383
F9	4	1	a2	5.03	0.0142583	0.5408	0.526542	0.0334	0.5074	1.13912	87.7873	45	0.1	450	30	5030	0.0198807	0.9	10.7595	47.4264	22.6867
F9	4	1	a2	5.03	0.0142583	0.5407	0.526442	0.0345	0.5062	1.13912	87.7873	45	0.1	450	30	5030	0.0198807	0.9	10.734	47.4264	22.633
F9	4	1	a2	5.03	0.0142583	0.5408	0.526542	0.0348	0.506	1.13912	87.7873	45	0.1	450	30	5030	0.0198807	0.9	10.7298	47.4264	22.6241
F9	4	1	b1	5.04	0.0142583	0.5243	0.510042	0.0315	0.4928	1.13912	87.7873	45	0.1	450	30	5040	0.0198413	0.9	10.4291	47.4264	21.9901
F9	4	1	b1	5.04	0.0142583	0.5251	0.510842	0.0319	0.4932	1.13912	87.7873	45	0.1	450	30	5040	0.0198413	0.9	10.4376	47.4264	22.008
F9	4	1	b1	5.04	0.0142583	0.5256	0.511342	0.0328	0.4928	1.13912	87.7873	45	0.1	450	30	5040	0.0198413	0.9	10.4291	47.4264	21.9901
F9	4	1	b2	5.04	0.0142583	0.5445	0.530242	0.0336	0.5109	1.13912	87.7873	45	0.1	450	30	5040	0.0198413	0.9	10.8122	47.4264	22.7978
F9	4	1	b2	5.04	0.0142583	0.5438	0.529542	0.0339	0.5099	1.13912	87.7873	45	0.1	450	30	5040	0.0198413	0.9	10.791	47.4264	22.7532
F9	4	1	b2	5.04	0.0142583	0.5424	0.528142	0.0337	0.5087	1.13912	87.7873	45	0.1	450	30	5040	0.0198413	0.9	10.7656	47.4264	22.6996
F9	4	2	a1	5.06	0.0142583	0.4611	0.446842	0.0284	0.4327	1.13912	87.7873	45	0.1	450	30	5060	0.0197628	0.9	9.12104	47.4264	19.232
F9	4	2	a1	5.06	0.0142583	0.4598	0.445542	0.0281	0.4317	1.13912	87.7873	45	0.1	450	30	5060	0.0197628	0.9	9.09996	47.4264	19.1875
F9	4	2	a1	5.06	0.0142583	0.4607	0.446442	0.0289	0.4318	1.13912	87.7873	45	0.1	450	30	5060	0.0197628	0.9	9.10207	47.4264	19.192
F9	4	2	a2	5.06	0.0142583	0.4952	0.480942	0.0126	0.4826	1.13912	87.7873	45	0.1	450	30	5060	0.0197628	0.9	10.1729	47.4264	21.4499
F9	4	2	a2	5.06	0.0142583	0.4939	0.479642	0.0126	0.4813	1.13912	87.7873	45	0.1	450	30	5060	0.0197628	0.9	10.1455	47.4264	21.3921
F9	4	2	a2	5.06	0.0142583	0.4936	0.479342	0.0126	0.481	1.13912	87.7873	45	0.1	450	30	5060	0.0197628	0.9	10.1392	47.4264	21.3788
F9	4	2	b1	5.09	0.0142583	0.4788	0.464542	0.0122	0.4666	1.13912	87.7873	45	0.1	450	30	5090	0.0196464	0.9	9.77766	47.4264	20.6165
F9	4	2	b1	5.09	0.0142583	0.4797	0.465442	0.0116	0.4681	1.13912	87.7873	45	0.1	450	30	5090	0.0196464	0.9	9.80909	47.4264	20.6828
F9	4	2	b1	5.09	0.0142583	0.4791	0.464842	0.0119	0.4672	1.13912	87.7873	45	0.1	450	30	5090	0.0196464	0.9	9.79024	47.4264	20.643
F9	4	2	b2	5.09	0.0142583	0.498	0.483742	0.0245	0.4735	1.13912	87.7873	45	0.1	450	30	5090	0.0196464	0.9	9.92225	47.4264	20.9214
F9	4	2	b2	5.09	0.0142583	0.4978	0.483542	0.0248	0.473	1.13912	87.7873	45	0.1	450	30	5090	0.0196464	0.9	9.91177	47.4264	20.8993
F9	4	2	b2	5.09	0.0142583	0.4982	0.483942	0.0238	0.4744	1.13912	87.7873	45	0.1	450	30	5090	0.0196464	0.9	9.94111	47.4264	20.9611
F12	4	1	a1	5.02	0.0142583	0.6491	0.634842	0.0825	0.5666	1.13912	87.7873	45	0.1	450	30	5020	0.0199203	0.9	12.0387	48.2897	24.9302
F12	4	1	a1	5.02	0.0142583	0.6523	0.638042	0.0824	0.5699	1.13912	87.7873	45	0.1	450	30	5020	0.0199203	0.9	12.1089	48.2897	25.0754
F12	4	1	a1	5.02	0.0142583	0.6522	0.637942	0.0829	0.5693	1.13912	87.7873	45	0.1	450	30	5020	0.0199203	0.9	12.0961	48.2897	25.049
F12	4	1	a2	5.02	0.0142583	0.6713	0.657042	0.0881	0.5832	1.13912	87.7873	45	0.1	450	30	5020	0.0199203	0.9	12.3914	48.2897	25.6606
F12	4	1	a2	5.02	0.0142583	0.6715	0.657242	0.0889	0.5826	1.13912	87.7873	45	0.1	450	30	5020	0.0199203	0.9	12.3787	48.2897	25.6342
F12	4	1	a2	5.02	0.0142583	0.6709	0.656642	0.089	0.5819	1.13912	87.7873	45	0.1	450	30	5020	0.0199203	0.9	12.3638	48.2897	25.6034
F12	4	1	b1	5.07	0.0142583	0.6598	0.645542	0.0639	0.5959	1.13912	87.7873	45	0.1	450	30	5070	0.0197239	0.9	12.5364	48.2897	25.9609
F12	4	1	b1	5.07	0.0142583	0.6608	0.646542	0.0683	0.5925	1.13912	87.7873	45	0.1	450	30	5070	0.0197239	0.9	12.4649	48.2897	25.8127
F12	4	1	b1	5.07	0.0142583	0.66	0.645742	0.0627	0.5973	1.13912	87.7873	45	0.1	450	30	5070	0.0197239	0.9	12.5659	48.2897	26.0219
F12	4	1	b2	5.07	0.0142583	0.6991	0.684842	0.0738	0.6253	1.13912	87.7873	45	0.1	450	30	5070	0.0197239	0.9	13.1549	48.2897	27.2417
F12	4	1	b2	5.07	0.0142583	0.6995	0.685242	0.0735	0.626	1.13912	87.7873	45	0.1	450	30	5070	0.0197239	0.9	13.1697	48.2897	27.2722
F12	4	1	b2	5.07	0.0142583	0.6997	0.685442	0.0732	0.6265	1.13912	87.7873	45	0.1	450	30	5070	0.0197239	0.9	13.1802	48.2897	27.294
F12	4	2	a1	5.05	0.0142583	0.5382	0.523942	0.0633	0.4749	1.13912	87.7873	45	0.1	450	30	5050	0.019802	0.9	10.0304	48.2897	20.7713
F12	4	2	a1	5.05	0.0142583	0.5369	0.522642	0.0623	0.4746	1.13912	87.7873	45	0.1	450	30	5050	0.019802	0.9	10.0241	48.2897	20.7582
F12	4	2	a1	5.05	0.0142583	0.5369	0.522642	0.0625	0.4744	1.13912	87.7873	45	0.1	450	30	5050	0.019802	0.9	10.0199	48.2897	20.7495
F12	4	2	a2	5.05	0.0142583	0.5467	0.532442	0.0786	0.4681	1.13912	87.7873	45	0.1	450	30	5050	0.019802	0.9	9.88679	48.2897	20.4739
F12	4	2	a2	5.05	0.0142583	0.5476	0.533342	0.0789	0.4687	1.13912	87.7873	45	0.1	450	30	5050	0.019802	0.9	9.89946	48.2897	20.5002
F12	4	2	a2	5.05	0.0142583	0.5486	0.534342	0.0792	0.4694	1.13912	87.7873	45	0.1	450	30	5050	0.019802	0.9	9.91425	48.2897	20.5308
F12	4	2	b1	5.04	0.0142583	0.5638	0.549542	0.0798	0.484	1.13912	87.7873	45	0.1	450	30	5040	0.0198413	0.9	10.2429	48.2897	21.2114
F12	4	2	b1	5.04	0.0142583	0.563	0.548742	0.08	0.483	1.13912	87.7873	45	0.1	450	30	5040	0.0198413	0.9	10.2217	48.2897	21.1675
F12	4	2	b1	5.04	0.0142583	0.5636	0.549342	0.0797	0.4839	1.13912	87.7873	45	0.1	450	30	5040	0.0198413	0.9	10.2408	48.2897	21.207
F12	4	2	b2	5.04	0.0142583	0.6131	0.598842	0.0642	0.5489	1.13912	87.7873	45	0.1	450	30	5040	0.0198413	0.9	11.6164	48.2897	24.0556
F12	4	2	b2	5.04	0.0142583	0.6121	0.597842	0.0636	0.5485	1.13912	87.7873	45	0.1	450	30	5040	0.0198413	0.9	11.6079	48.2897	24.0381
F12	4	2	b2	5.04	0.0142583	0.6122	0.597942	0.0644	0.5478	1.13912	87.7873	45	0.1	450	30	5040	0.0198413	0.9	11.5931	48.2897	24.0074
F18	4	1	a1	5.04	0.0142583	0.651	0.636742	0.1034	0.5476	1.13912	87.7873	45	0.1	450	30	5040	0.0198413	0.9	11.5889	53.909	21.4971
F18	4	1	a1	5.04	0.0142583	0.6509	0.636642	0.1032	0.5477	1.13912	87.7873	45	0.1	450	30	5040	0.0198413	0.9	11.591	53.909	21.501
F18	4	1	a1	5.04	0.0142583	0.6511	0.636842	0.1032	0.5479	1.13912	87.7873	45	0.1	450	30	5040	0.0198413	0.9	11.5952	53.909	21.5089
F18	4	1	a2	5.04	0.0142583	0.6834	0.669142	0.1039	0.5795	1.13912	87.7873	45	0.1	450	30	5040	0.0198413	0.9	12.264	53.909	22.7494
F18	4	1	a2	5.04	0.0142583	0.6841	0.669842	0.1029	0.5812	1.13912	87.7873	45	0.1	450	30	5040	0.0198413	0.9	12.2999	53.909	22.8161
F18	4	1	a2	5.04	0.0142583	0.6839	0.669642	0.1025	0.5814	1.13912	87.7873	45	0.1	450	30	5040	0.0198413	0.9	12.3042	53.909	22.824
F18	4	1	b1	5.05	0.0142583	0.6812	0.666942	0.0566	0.6246	1.13912	87.7873	45	0.1	450	30	5050	0.019802	0.9	13.1922	53.909	24.4713
F18	4	1	b1	5.05	0.0142583	0.6818	0.667542	0.0562	0.6256	1.13912	87.7873	45	0.1	450	30	5050	0.019802	0.9	13.2134	53.909	24.5105
F18	4	1	b1	5.05	0.0142583	0.6806	0.666342	0.0569	0.6237	1.13912	87.7873	45	0.1	450	30	5050	0.019802	0.9	13.1732	53.909	24.4361
F18	4	1	b2	5.05	0.0142583	0.7166	0.702342	0.055	0.6616	1.13912	87.7873	45	0.1	450	30	5050	0.019802	0.9	13.9737	53.909	25.921
F18	4	1	b2	5.05	0.0142583	0.7166	0.702342	0.055	0.6616	1.13912	87.7873	45	0.1	450	30	5050	0.019802	0.9	13.9737	53.909	25.921
F18	4	1	b2	5.05	0.0142583	0.7166	0.702342	0.059	0.6576	1.13912	87.7873	45	0.1	450	30	5050	0.019802	0.9	13.8892	53.909	25.7643
F18	4	2	a1	5.05	0.0142583	0.6132	0.598942	0.0905	0.5227	1.13912	87.7873	45	0.1	450	30	5050	0.019802	0.9	11.04	53.909	20.479
F18	4	2	a1	5.05	0.0142583	0.6149	0.600642	0.0893	0.5256	1.13912	87.7873	45	0.1	450	30	5050	0.019802	0.9	11.1013	53.909	20.5926
F18	4	2	a1	5.05	0.0142583	0.6144	0.600142	0.0898	0.5246	1.13912	87.7873	45	0.1	450	30	5050	0.019802	0.9	11.0801	53.909	20.5534
F18	4	2	a2	5.05	0.0142583	0.6338	0.619542	0.0902	0.5436	1.13912	87.7873	45	0.1	450	30	5050	0.019802	0.9	11.4814	53.909	21.2978
F18	4	2	a2	5.05	0.0142583	0.6339	0.619642	0.09	0.5439	1.13912	87.7873	45	0.1	450	30	5050	0.019802	0.9	11.4878	53.909	21.3096
F18	4	2	a2	5.05	0.0142583	0.6335	0.619242	0.0899	0.5436	1.13912	87.7873	45	0.1	450	30	5050	0.019802	0.9	11.4814	53.909	21.2978
F18	4	2	b1	5.08	0.0142583	0.6333	0.619042	0.1178	0.5155	1.13912	87.7873	45	0.1	450	30	5080	0.019685	0.9	10.8236	53.909	20.0776
F18	4	2	b1	5.08	0.0142583	0.6322	0.617942	0.1183	0.5139	1.13912	87.7873	45	0.1	450	30	5080	0.019685	0.9	10.79	53.909	20.0153
F18	4	2	b1	5.08	0.0142583	0.6323	0.618042	0.1181	0.5142	1.13912	87.7873	45	0.1	450	30	5080	0.019685	0.9	10.7963	53.909	20.027
F18	4	2	b2	5.08	0.0142583	0.6675	0.653242	0.1155	0.552	1.13912	87.7873	45	0.1	450	30	5080	0.019685	0.9	11.59	53.909	21.4992
F18	4	2	b2	5.08	0.0142583	0.6676	0.653342	0.1148	0.5528	1.13912	87.7873	45	0.1	450	30	5080	0.019685	0.9	11.6068	53.909	21.5304
F18	4	2	b2	5.08	0.0142583	0.6675	0.653242	0.1144	0.5531	1.13912	87.7873	45	0.1	450	30	5080	0.019685	0.9	11.6131	53.909	21.5421

## Sheet: Gopod S5
sample ID	Sampling	Batch	replication	Sample weight (g)	A510 blank	A510 sample	Asample-Ablank	Acontrol	Asample-Acontrol (ΔA)	A510 glucose STD	F (100µg glucose/A STD)	Extraction volume (mL)	Volume analized (mL)	Extraction V/Analized V	Dilutions	Sample weight (mg)	100/sample weight	162/180	dig. starch %	wet tot. starch %	dig/tot %		g/100g total starch
F1	5	1	a1	5.09	0.0142583	0.7163	0.702042	0.0148	0.7015	1.13912	87.7873	45	0.1	450	30	5090	0.0196464	0.9	14.7	61.2394	24.0042		Sampling 5	Mean	SD
F1	5	1	a1	5.09	0.0142583	0.7162	0.701942	0.0145	0.7017	1.13912	87.7873	45	0.1	450	30	5090	0.0196464	0.9	14.7042	61.2394	24.011		1	21.9065	1.96749				S5	starch dig
F1	5	1	a1	5.09	0.0142583	0.7168	0.702542	0.0151	0.7017	1.13912	87.7873	45	0.1	450	30	5090	0.0196464	0.9	14.7042	61.2394	24.011		3	24.258	0.857382				F1	24.0042
F1	5	1	a2	5.09	0.0142583	0.7258	0.711542	0.0289	0.6969	1.13912	87.7873	45	0.1	450	30	5090	0.0196464	0.9	14.6036	61.2394	23.8468		4	19.6545	1.95342				F1	24.011
F1	5	1	a2	5.09	0.0142583	0.7262	0.711942	0.0283	0.6979	1.13912	87.7873	45	0.1	450	30	5090	0.0196464	0.9	14.6246	61.2394	23.881		5	16.4938	2.20987				F1	24.011
F1	5	1	a2	5.09	0.0142583	0.727	0.712742	0.0286	0.6984	1.13912	87.7873	45	0.1	450	30	5090	0.0196464	0.9	14.6351	61.2394	23.8981		9	23.4481	0.814406				F1	23.8468
F1	5	1	b1	5.06	0.0142583	0.6608	0.646542	0.0249	0.6359	1.13912	87.7873	45	0.1	450	30	5060	0.0197628	0.9	13.4044	61.2394	21.8885		12	27.1538	2.75444				F1	23.881
F1	5	1	b1	5.06	0.0142583	0.66	0.645742	0.0243	0.6357	1.13912	87.7873	45	0.1	450	30	5060	0.0197628	0.9	13.4002	61.2394	21.8816		18	24.0999	2.33089				F1	23.8981
F1	5	1	b1	5.06	0.0142583	0.6591	0.644842	0.0253	0.6338	1.13912	87.7873	45	0.1	450	30	5060	0.0197628	0.9	13.3601	61.2394	21.8162								F1	21.8885
F1	5	1	b2	5.06	0.0142583	0.6943	0.680042	0.0294	0.6649	1.13912	87.7873	45	0.1	450	30	5060	0.0197628	0.9	14.0157	61.2394	22.8867								F1	21.8816
F1	5	1	b2	5.06	0.0142583	0.6935	0.679242	0.0301	0.6634	1.13912	87.7873	45	0.1	450	30	5060	0.0197628	0.9	13.9841	61.2394	22.835		g/100g porridge						F1	21.8162
F1	5	1	b2	5.06	0.0142583	0.6932	0.678942	0.0299	0.6633	1.13912	87.7873	45	0.1	450	30	5060	0.0197628	0.9	13.9819	61.2394	22.8316		Sampling 5	Mean	SD				F1	22.8867
F1	5	2	a1	5.03	0.0142583	0.656	0.641742	0.0419	0.6141	1.13912	87.7873	45	0.1	450	30	5030	0.0198807	0.9	13.022	61.2394	21.2641		1	13.3333	1.04659				F1	22.835
F1	5	2	a1	5.03	0.0142583	0.6562	0.641942	0.0416	0.6146	1.13912	87.7873	45	0.1	450	30	5030	0.0198807	0.9	13.0326	61.2394	21.2815		3	13.9838	0.494247				F1	22.8316
F1	5	2	a1	5.03	0.0142583	0.6548	0.640542	0.0416	0.6132	1.13912	87.7873	45	0.1	450	30	5030	0.0198807	0.9	13.003	61.2394	21.233		4	11.2999	1.12307				F1	21.2641
F1	5	2	a2	5.03	0.0142583	0.6665	0.652242	0.0458	0.6207	1.13912	87.7873	45	0.1	450	30	5030	0.0198807	0.9	13.162	61.2394	21.4927		5	10.3821	1.39101				F1	21.2815
F1	5	2	a2	5.03	0.0142583	0.6663	0.652042	0.0461	0.6202	1.13912	87.7873	45	0.1	450	30	5030	0.0198807	0.9	13.1514	61.2394	21.4754		9	11.1206	0.386243				F1	21.233
F1	5	2	a2	5.03	0.0142583	0.666	0.651742	0.0458	0.6202	1.13912	87.7873	45	0.1	450	30	5030	0.0198807	0.9	13.1514	61.2394	21.4754		12	13.1125	1.33011				F1	21.4927
F1	5	2	b1	5.03	0.0142583	0.6018	0.587542	0.0285	0.5733	1.13912	87.7873	45	0.1	450	30	5030	0.0198807	0.9	12.1569	61.2394	19.8514		18	12.992	1.25656				F1	21.4754
F1	5	2	b1	5.03	0.0142583	0.6017	0.587442	0.0279	0.5738	1.13912	87.7873	45	0.1	450	30	5030	0.0198807	0.9	12.1675	61.2394	19.8687								F1	21.4754
F1	5	2	b1	5.03	0.0142583	0.6008	0.586542	0.0272	0.5736	1.13912	87.7873	45	0.1	450	30	5030	0.0198807	0.9	12.1632	61.2394	19.8618								F1	19.8514
F1	5	2	b2	5.03	0.0142583	0.5913	0.577042	0.0438	0.5475	1.13912	87.7873	45	0.1	450	30	5030	0.0198807	0.9	11.6098	61.2394	18.958								F1	19.8687
F1	5	2	b2	5.03	0.0142583	0.5916	0.577342	0.043	0.5486	1.13912	87.7873	45	0.1	450	30	5030	0.0198807	0.9	11.6331	61.2394	18.9961								F1	19.8618
F1	5	2	b2	5.03	0.0142583	0.5914	0.577142	0.043	0.5484	1.13912	87.7873	45	0.1	450	30	5030	0.0198807	0.9	11.6289	61.2394	18.9892								F1	18.958
F3	5	1	a1	5.04	0.0142583	0.7608	0.746542	0.1095	0.6513	1.13912	87.7873	45	0.1	450	30	5040	0.0198413	0.9	13.7835	57.6461	23.9105								F1	18.9961
F3	5	1	a1	5.04	0.0142583	0.7608	0.746542	0.109	0.6518	1.13912	87.7873	45	0.1	450	30	5040	0.0198413	0.9	13.7941	57.6461	23.9289								F1	18.9892
F3	5	1	a1	5.04	0.0142583	0.7612	0.746942	0.1084	0.6528	1.13912	87.7873	45	0.1	450	30	5040	0.0198413	0.9	13.8152	57.6461	23.9656								F3	23.9105
F3	5	1	a2	5.04	0.0142583	0.7866	0.772342	0.1102	0.6764	1.13912	87.7873	45	0.1	450	30	5040	0.0198413	0.9	14.3147	57.6461	24.832								F3	23.9289
F3	5	1	a2	5.04	0.0142583	0.7858	0.771542	0.1106	0.6752	1.13912	87.7873	45	0.1	450	30	5040	0.0198413	0.9	14.2893	57.6461	24.7879								F3	23.9656
F3	5	1	a2	5.04	0.0142583	0.7861	0.771842	0.1107	0.6754	1.13912	87.7873	45	0.1	450	30	5040	0.0198413	0.9	14.2935	57.6461	24.7953								F3	24.832
F3	5	1	b1	5.03	0.0142583	0.7266	0.712342	0.1129	0.6137	1.13912	87.7873	45	0.1	450	30	5030	0.0198807	0.9	13.0136	57.6461	22.5749								F3	24.7879
F3	5	1	b1	5.03	0.0142583	0.7263	0.712042	0.1125	0.6138	1.13912	87.7873	45	0.1	450	30	5030	0.0198807	0.9	13.0157	57.6461	22.5786								F3	24.7953
F3	5	1	b1	5.03	0.0142583	0.7254	0.711142	0.1124	0.613	1.13912	87.7873	45	0.1	450	30	5030	0.0198807	0.9	12.9987	57.6461	22.5492								F3	22.5749
F3	5	1	b2	5.03	0.0142583	0.7646	0.750342	0.1066	0.658	1.13912	87.7873	45	0.1	450	30	5030	0.0198807	0.9	13.9529	57.6461	24.2045								F3	22.5786
F3	5	1	b2	5.03	0.0142583	0.7639	0.749642	0.1071	0.6568	1.13912	87.7873	45	0.1	450	30	5030	0.0198807	0.9	13.9275	57.6461	24.1604								F3	22.5492
F3	5	1	b2	5.03	0.0142583	0.7639	0.749642	0.1062	0.6577	1.13912	87.7873	45	0.1	450	30	5030	0.0198807	0.9	13.9466	57.6461	24.1935								F3	24.2045
F3	5	2	a1	5.06	0.0142583	0.7511	0.736842	0.1061	0.645	1.13912	87.7873	45	0.1	450	30	5060	0.0197628	0.9	13.5962	57.6461	23.5856								F3	24.1604
F3	5	2	a1	5.06	0.0142583	0.7507	0.736442	0.1064	0.6443	1.13912	87.7873	45	0.1	450	30	5060	0.0197628	0.9	13.5814	57.6461	23.56								F3	24.1935
F3	5	2	a1	5.06	0.0142583	0.7509	0.736642	0.1061	0.6448	1.13912	87.7873	45	0.1	450	30	5060	0.0197628	0.9	13.592	57.6461	23.5783								F3	23.5856
F3	5	2	a2	5.06	0.0142583	0.768	0.753742	0.0932	0.6748	1.13912	87.7873	45	0.1	450	30	5060	0.0197628	0.9	14.2244	57.6461	24.6753								F3	23.56
F3	5	2	a2	5.06	0.0142583	0.7682	0.753942	0.0923	0.6759	1.13912	87.7873	45	0.1	450	30	5060	0.0197628	0.9	14.2475	57.6461	24.7156								F3	23.5783
F3	5	2	a2	5.06	0.0142583	0.7693	0.755042	0.0915	0.6778	1.13912	87.7873	45	0.1	450	30	5060	0.0197628	0.9	14.2876	57.6461	24.785								F3	24.6753
F3	5	2	b1	5.05	0.0142583	0.7553	0.741042	0.0756	0.6797	1.13912	87.7873	45	0.1	450	30	5050	0.019802	0.9	14.356	57.6461	24.9037								F3	24.7156
F3	5	2	b1	5.05	0.0142583	0.7538	0.739542	0.076	0.6778	1.13912	87.7873	45	0.1	450	30	5050	0.019802	0.9	14.3159	57.6461	24.8341								F3	24.785
F3	5	2	b1	5.05	0.0142583	0.7548	0.740542	0.0758	0.679	1.13912	87.7873	45	0.1	450	30	5050	0.019802	0.9	14.3412	57.6461	24.8781								F3	24.9037
F3	5	2	b2	5.05	0.0142583	0.7919	0.777642	0.0969	0.695	1.13912	87.7873	45	0.1	450	30	5050	0.019802	0.9	14.6792	57.6461	25.4643								F3	24.8341
F3	5	2	b2	5.05	0.0142583	0.7897	0.775442	0.0969	0.6928	1.13912	87.7873	45	0.1	450	30	5050	0.019802	0.9	14.6327	57.6461	25.3837								F3	24.8781
F3	5	2	b2	5.05	0.0142583	0.7895	0.775242	0.0977	0.6918	1.13912	87.7873	45	0.1	450	30	5050	0.019802	0.9	14.6116	57.6461	25.3471								F3	25.4643
F4	5	1	a1	5.05	0.0142583	0.6123	0.598042	0.0866	0.5257	1.13912	87.7873	45	0.1	450	30	5050	0.019802	0.9	11.1034	57.4925	19.3127								F3	25.3837
F4	5	1	a1	5.05	0.0142583	0.612	0.597742	0.0873	0.5247	1.13912	87.7873	45	0.1	450	30	5050	0.019802	0.9	11.0822	57.4925	19.276								F3	25.3471
F4	5	1	a1	5.05	0.0142583	0.6127	0.598442	0.086	0.5267	1.13912	87.7873	45	0.1	450	30	5050	0.019802	0.9	11.1245	57.4925	19.3495								F4	19.3127
F4	5	1	a2	5.05	0.0142583	0.629	0.614742	0.083	0.546	1.13912	87.7873	45	0.1	450	30	5050	0.019802	0.9	11.5321	57.4925	20.0585								F4	19.276
F4	5	1	a2	5.05	0.0142583	0.6289	0.614642	0.0837	0.5452	1.13912	87.7873	45	0.1	450	30	5050	0.019802	0.9	11.5152	57.4925	20.0291								F4	19.3495
F4	5	1	a2	5.05	0.0142583	0.6294	0.615142	0.084	0.5454	1.13912	87.7873	45	0.1	450	30	5050	0.019802	0.9	11.5195	57.4925	20.0364								F4	20.0585
F4	5	1	b1	5.04	0.0142583	0.6711	0.656842	0.0933	0.5778	1.13912	87.7873	45	0.1	450	30	5040	0.0198413	0.9	12.228	57.4925	21.2688								F4	20.0291
F4	5	1	b1	5.04	0.0142583	0.671	0.656742	0.0933	0.5777	1.13912	87.7873	45	0.1	450	30	5040	0.0198413	0.9	12.2259	57.4925	21.2652								F4	20.0364
F4	5	1	b1	5.04	0.0142583	0.6719	0.657642	0.0932	0.5787	1.13912	87.7873	45	0.1	450	30	5040	0.0198413	0.9	12.247	57.4925	21.302								F4	21.2688
F4	5	1	b2	5.04	0.0142583	0.6334	0.619142	0.0736	0.5598	1.13912	87.7873	45	0.1	450	30	5040	0.0198413	0.9	11.8471	57.4925	20.6063								F4	21.2652
F4	5	1	b2	5.04	0.0142583	0.6319	0.617642	0.0742	0.5577	1.13912	87.7873	45	0.1	450	30	5040	0.0198413	0.9	11.8026	57.4925	20.529								F4	21.302
F4	5	1	b2	5.04	0.0142583	0.6326	0.618342	0.0742	0.5584	1.13912	87.7873	45	0.1	450	30	5040	0.0198413	0.9	11.8174	57.4925	20.5547								F4	20.6063
F4	5	2	a1	5.06	0.0142583	0.6339	0.619642	0.0615	0.5724	1.13912	87.7873	45	0.1	450	30	5060	0.0197628	0.9	12.0658	57.4925	20.9868								F4	20.529
F4	5	2	a1	5.06	0.0142583	0.6342	0.619942	0.0612	0.573	1.13912	87.7873	45	0.1	450	30	5060	0.0197628	0.9	12.0785	57.4925	21.0088								F4	20.5547
F4	5	2	a1	5.06	0.0142583	0.6337	0.619442	0.0607	0.573	1.13912	87.7873	45	0.1	450	30	5060	0.0197628	0.9	12.0785	57.4925	21.0088								F4	20.9868
F4	5	2	a2	5.06	0.0142583	0.6734	0.659142	0.078	0.5954	1.13912	87.7873	45	0.1	450	30	5060	0.0197628	0.9	12.5507	57.4925	21.8301								F4	21.0088
F4	5	2	a2	5.06	0.0142583	0.6731	0.658842	0.077	0.5961	1.13912	87.7873	45	0.1	450	30	5060	0.0197628	0.9	12.5654	57.4925	21.8557								F4	21.0088
F4	5	2	a2	5.06	0.0142583	0.6721	0.657842	0.077	0.5951	1.13912	87.7873	45	0.1	450	30	5060	0.0197628	0.9	12.5443	57.4925	21.8191								F4	21.8301
F4	5	2	b1	5.03	0.0142583	0.5309	0.516642	0.0914	0.4395	1.13912	87.7873	45	0.1	450	30	5030	0.0198807	0.9	9.31964	57.4925	16.2102								F4	21.8557
F4	5	2	b1	5.03	0.0142583	0.5317	0.517442	0.0975	0.4342	1.13912	87.7873	45	0.1	450	30	5030	0.0198807	0.9	9.20725	57.4925	16.0147								F4	21.8191
F4	5	2	b1	5.03	0.0142583	0.5315	0.517242	0.0854	0.4461	1.13912	87.7873	45	0.1	450	30	5030	0.0198807	0.9	9.45959	57.4925	16.4536								F4	16.2102
F4	5	2	b2	5.03	0.0142583	0.5658	0.551542	0.1052	0.4606	1.13912	87.7873	45	0.1	450	30	5030	0.0198807	0.9	9.76706	57.4925	16.9884								F4	16.0147
F4	5	2	b2	5.03	0.0142583	0.5654	0.551142	0.1047	0.4607	1.13912	87.7873	45	0.1	450	30	5030	0.0198807	0.9	9.76918	57.4925	16.9921								F4	16.4536
F4	5	2	b2	5.03	0.0142583	0.5648	0.550542	0.1052	0.4596	1.13912	87.7873	45	0.1	450	30	5030	0.0198807	0.9	9.74586	57.4925	16.9515								F4	16.9884
F5	5	1	a1	5.04	0.0142583	0.6715	0.657242	0.0915	0.58	1.13912	87.7873	45	0.1	450	30	5040	0.0198413	0.9	12.2745	62.9454	19.5003								F4	16.9921
F5	5	1	a1	5.04	0.0142583	0.6713	0.657042	0.0926	0.5787	1.13912	87.7873	45	0.1	450	30	5040	0.0198413	0.9	12.247	62.9454	19.4566								F4	16.9515
F5	5	1	a1	5.04	0.0142583	0.6713	0.657042	0.0932	0.5781	1.13912	87.7873	45	0.1	450	30	5040	0.0198413	0.9	12.2343	62.9454	19.4364								F5	19.5003
F5	5	1	a2	5.04	0.0142583	0.7	0.685742	0.1121	0.5879	1.13912	87.7873	45	0.1	450	30	5040	0.0198413	0.9	12.4417	62.9454	19.7659								F5	19.4566
F5	5	1	a2	5.04	0.0142583	0.6989	0.684642	0.1119	0.587	1.13912	87.7873	45	0.1	450	30	5040	0.0198413	0.9	12.4227	62.9454	19.7357								F5	19.4364
F5	5	1	a2	5.04	0.0142583	0.6988	0.684542	0.1122	0.5866	1.13912	87.7873	45	0.1	450	30	5040	0.0198413	0.9	12.4142	62.9454	19.7222								F5	19.7659
F5	5	1	b1	5.08	0.0142583	0.5074	0.493142	0.1164	0.391	1.13912	87.7873	45	0.1	450	30	5080	0.019685	0.9	8.20958	62.9454	13.0424								F5	19.7357
F5	5	1	b1	5.08	0.0142583	0.5068	0.492542	0.1154	0.3914	1.13912	87.7873	45	0.1	450	30	5080	0.019685	0.9	8.21798	62.9454	13.0557								F5	19.7222
F5	5	1	b1	5.08	0.0142583	0.5074	0.493142	0.1158	0.3916	1.13912	87.7873	45	0.1	450	30	5080	0.019685	0.9	8.22218	62.9454	13.0624								F5	13.0424
F5	5	1	b2	5.08	0.0142583	0.5439	0.529642	0.1085	0.4354	1.13912	87.7873	45	0.1	450	30	5080	0.019685	0.9	9.14182	62.9454	14.5234								F5	13.0557
F5	5	1	b2	5.08	0.0142583	0.5431	0.528842	0.1085	0.4346	1.13912	87.7873	45	0.1	450	30	5080	0.019685	0.9	9.12503	62.9454	14.4967								F5	13.0624
F5	5	1	b2	5.08	0.0142583	0.5437	0.529442	0.1086	0.4351	1.13912	87.7873	45	0.1	450	30	5080	0.019685	0.9	9.13552	62.9454	14.5134								F5	14.5234
F5	5	2	a1	5.06	0.0142583	0.5888	0.574542	0.1055	0.4833	1.13912	87.7873	45	0.1	450	30	5060	0.0197628	0.9	10.1877	62.9454	16.1849								F5	14.4967
F5	5	2	a1	5.06	0.0142583	0.5893	0.575042	0.1057	0.4836	1.13912	87.7873	45	0.1	450	30	5060	0.0197628	0.9	10.194	62.9454	16.195								F5	14.5134
F5	5	2	a1	5.06	0.0142583	0.5888	0.574542	0.1046	0.4842	1.13912	87.7873	45	0.1	450	30	5060	0.0197628	0.9	10.2066	62.9454	16.215								F5	16.1849
F5	5	2	a2	5.06	0.0142583	0.6183	0.604042	0.1051	0.5132	1.13912	87.7873	45	0.1	450	30	5060	0.0197628	0.9	10.8179	62.9454	17.1862								F5	16.195
F5	5	2	a2	5.06	0.0142583	0.6194	0.605142	0.1042	0.5152	1.13912	87.7873	45	0.1	450	30	5060	0.0197628	0.9	10.8601	62.9454	17.2532								F5	16.215
F5	5	2	a2	5.06	0.0142583	0.6192	0.604942	0.1047	0.5145	1.13912	87.7873	45	0.1	450	30	5060	0.0197628	0.9	10.8453	62.9454	17.2297								F5	17.1862
F5	5	2	b1	5.05	0.0142583	0.5963	0.582042	0.1441	0.4522	1.13912	87.7873	45	0.1	450	30	5050	0.019802	0.9	9.55096	62.9454	15.1734								F5	17.2532
F5	5	2	b1	5.05	0.0142583	0.5976	0.583342	0.1434	0.4542	1.13912	87.7873	45	0.1	450	30	5050	0.019802	0.9	9.59321	62.9454	15.2405								F5	17.2297
F5	5	2	b1	5.05	0.0142583	0.5969	0.582642	0.1444	0.4525	1.13912	87.7873	45	0.1	450	30	5050	0.019802	0.9	9.5573	62.9454	15.1835								F5	15.1734
F5	5	2	b2	5.05	0.0142583	0.6114	0.597142	0.1187	0.4927	1.13912	87.7873	45	0.1	450	30	5050	0.019802	0.9	10.4064	62.9454	16.5324								F5	15.2405
F5	5	2	b2	5.05	0.0142583	0.611	0.596742	0.1175	0.4935	1.13912	87.7873	45	0.1	450	30	5050	0.019802	0.9	10.4233	62.9454	16.5592								F5	15.1835
F5	5	2	b2	5.05	0.0142583	0.6115	0.597242	0.1172	0.4943	1.13912	87.7873	45	0.1	450	30	5050	0.019802	0.9	10.4402	62.9454	16.5861								F5	16.5324
F9	5	1	a1	5.03	0.0142583	0.5641	0.549842	0.0334	0.5307	1.13912	87.7873	45	0.1	450	30	5030	0.0198807	0.9	11.2535	47.4264	23.7284								F5	16.5592
F9	5	1	a1	5.03	0.0142583	0.564	0.549742	0.0329	0.5311	1.13912	87.7873	45	0.1	450	30	5030	0.0198807	0.9	11.262	47.4264	23.7463								F5	16.5861
F9	5	1	a1	5.03	0.0142583	0.5634	0.549142	0.0334	0.53	1.13912	87.7873	45	0.1	450	30	5030	0.0198807	0.9	11.2387	47.4264	23.6971
F9	5	1	a2	5.03	0.0142583	0.582	0.567742	0.0334	0.5486	1.13912	87.7873	45	0.1	450	30	5030	0.0198807	0.9	11.6331	47.4264	24.5288
F9	5	1	a2	5.03	0.0142583	0.582	0.567742	0.0345	0.5475	1.13912	87.7873	45	0.1	450	30	5030	0.0198807	0.9	11.6098	47.4264	24.4796
F9	5	1	a2	5.03	0.0142583	0.5814	0.567142	0.0348	0.5466	1.13912	87.7873	45	0.1	450	30	5030	0.0198807	0.9	11.5907	47.4264	24.4393
F9	5	1	b1	5.04	0.0142583	0.5741	0.559842	0.0315	0.5426	1.13912	87.7873	45	0.1	450	30	5040	0.0198413	0.9	11.4831	47.4264	24.2124
F9	5	1	b1	5.04	0.0142583	0.5738	0.559542	0.0319	0.5419	1.13912	87.7873	45	0.1	450	30	5040	0.0198413	0.9	11.4682	47.4264	24.1811
F9	5	1	b1	5.04	0.0142583	0.5733	0.559042	0.0328	0.5405	1.13912	87.7873	45	0.1	450	30	5040	0.0198413	0.9	11.4386	47.4264	24.1187
F9	5	1	b2	5.04	0.0142583	0.572	0.557742	0.0336	0.5384	1.13912	87.7873	45	0.1	450	30	5040	0.0198413	0.9	11.3942	47.4264	24.0249
F9	5	1	b2	5.04	0.0142583	0.5698	0.555542	0.0339	0.5359	1.13912	87.7873	45	0.1	450	30	5040	0.0198413	0.9	11.3413	47.4264	23.9134
F9	5	1	b2	5.04	0.0142583	0.5678	0.553542	0.0337	0.5341	1.13912	87.7873	45	0.1	450	30	5040	0.0198413	0.9	11.3032	47.4264	23.8331
F9	5	2	a1	5.06	0.0142583	0.5172	0.502942	0.0284	0.4888	1.13912	87.7873	45	0.1	450	30	5060	0.0197628	0.9	10.3036	47.4264	21.7254
F9	5	2	a1	5.06	0.0142583	0.518	0.503742	0.0281	0.4899	1.13912	87.7873	45	0.1	450	30	5060	0.0197628	0.9	10.3268	47.4264	21.7743
F9	5	2	a1	5.06	0.0142583	0.5188	0.504542	0.0289	0.4899	1.13912	87.7873	45	0.1	450	30	5060	0.0197628	0.9	10.3268	47.4264	21.7743
F9	5	2	a2	5.06	0.0142583	0.5399	0.525642	0.0126	0.5273	1.13912	87.7873	45	0.1	450	30	5060	0.0197628	0.9	11.1151	47.4264	23.4366
F9	5	2	a2	5.06	0.0142583	0.5398	0.525542	0.0126	0.5272	1.13912	87.7873	45	0.1	450	30	5060	0.0197628	0.9	11.113	47.4264	23.4322
F9	5	2	a2	5.06	0.0142583	0.5397	0.525442	0.0126	0.5271	1.13912	87.7873	45	0.1	450	30	5060	0.0197628	0.9	11.1109	47.4264	23.4277
F9	5	2	b1	5.09	0.0142583	0.5339	0.519642	0.0122	0.5217	1.13912	87.7873	45	0.1	450	30	5090	0.0196464	0.9	10.9323	47.4264	23.0511
F9	5	2	b1	5.09	0.0142583	0.5339	0.519642	0.0116	0.5223	1.13912	87.7873	45	0.1	450	30	5090	0.0196464	0.9	10.9449	47.4264	23.0776
F9	5	2	b1	5.09	0.0142583	0.533	0.518742	0.0119	0.5211	1.13912	87.7873	45	0.1	450	30	5090	0.0196464	0.9	10.9197	47.4264	23.0246
F9	5	2	b2	5.09	0.0142583	0.5462	0.531942	0.0245	0.5217	1.13912	87.7873	45	0.1	450	30	5090	0.0196464	0.9	10.9323	47.4264	23.0511
F9	5	2	b2	5.09	0.0142583	0.5454	0.531142	0.0248	0.5206	1.13912	87.7873	45	0.1	450	30	5090	0.0196464	0.9	10.9092	47.4264	23.0025
F9	5	2	b2	5.09	0.0142583	0.546	0.531742	0.0238	0.5222	1.13912	87.7873	45	0.1	450	30	5090	0.0196464	0.9	10.9428	47.4264	23.0732
F12	5	1	a1	5.02	0.0142583	0.756	0.741742	0.0825	0.6735	1.13912	87.7873	45	0.1	450	30	5020	0.0199203	0.9	14.3101	48.2897	29.6338
F12	5	1	a1	5.02	0.0142583	0.7548	0.740542	0.0824	0.6724	1.13912	87.7873	45	0.1	450	30	5020	0.0199203	0.9	14.2867	48.2897	29.5854
F12	5	1	a1	5.02	0.0142583	0.7547	0.740442	0.0829	0.6718	1.13912	87.7873	45	0.1	450	30	5020	0.0199203	0.9	14.274	48.2897	29.559
F12	5	1	a2	5.02	0.0142583	0.7677	0.753442	0.0881	0.6796	1.13912	87.7873	45	0.1	450	30	5020	0.0199203	0.9	14.4397	48.2897	29.9022
F12	5	1	a2	5.02	0.0142583	0.7695	0.755242	0.0889	0.6806	1.13912	87.7873	45	0.1	450	30	5020	0.0199203	0.9	14.4609	48.2897	29.9462
F12	5	1	a2	5.02	0.0142583	0.7689	0.754642	0.089	0.6799	1.13912	87.7873	45	0.1	450	30	5020	0.0199203	0.9	14.4461	48.2897	29.9154
F12	5	1	b1	5.07	0.0142583	0.7405	0.726242	0.0639	0.6766	1.13912	87.7873	45	0.1	450	30	5070	0.0197239	0.9	14.2342	48.2897	29.4766
F12	5	1	b1	5.07	0.0142583	0.7395	0.725242	0.0683	0.6712	1.13912	87.7873	45	0.1	450	30	5070	0.0197239	0.9	14.1206	48.2897	29.2414
F12	5	1	b1	5.07	0.0142583	0.7387	0.724442	0.0627	0.676	1.13912	87.7873	45	0.1	450	30	5070	0.0197239	0.9	14.2215	48.2897	29.4505
F12	5	1	b2	5.07	0.0142583	0.7677	0.753442	0.0738	0.6939	1.13912	87.7873	45	0.1	450	30	5070	0.0197239	0.9	14.5981	48.2897	30.2303
F12	5	1	b2	5.07	0.0142583	0.7673	0.753042	0.0735	0.6938	1.13912	87.7873	45	0.1	450	30	5070	0.0197239	0.9	14.596	48.2897	30.226
F12	5	1	b2	5.07	0.0142583	0.7666	0.752342	0.0732	0.6934	1.13912	87.7873	45	0.1	450	30	5070	0.0197239	0.9	14.5876	48.2897	30.2085
F12	5	2	a1	5.05	0.0142583	0.6234	0.609142	0.0633	0.5601	1.13912	87.7873	45	0.1	450	30	5050	0.019802	0.9	11.8299	48.2897	24.4978
F12	5	2	a1	5.05	0.0142583	0.6239	0.609642	0.0623	0.5616	1.13912	87.7873	45	0.1	450	30	5050	0.019802	0.9	11.8616	48.2897	24.5635
F12	5	2	a1	5.05	0.0142583	0.6234	0.609142	0.0625	0.5609	1.13912	87.7873	45	0.1	450	30	5050	0.019802	0.9	11.8468	48.2897	24.5328
F12	5	2	a2	5.05	0.0142583	0.6472	0.632942	0.0786	0.5686	1.13912	87.7873	45	0.1	450	30	5050	0.019802	0.9	12.0095	48.2897	24.8696
F12	5	2	a2	5.05	0.0142583	0.6488	0.634542	0.0789	0.5699	1.13912	87.7873	45	0.1	450	30	5050	0.019802	0.9	12.0369	48.2897	24.9265
F12	5	2	a2	5.05	0.0142583	0.649	0.634742	0.0792	0.5698	1.13912	87.7873	45	0.1	450	30	5050	0.019802	0.9	12.0348	48.2897	24.9221
F12	5	2	b1	5.04	0.0142583	0.6104	0.596142	0.0798	0.5306	1.13912	87.7873	45	0.1	450	30	5040	0.0198413	0.9	11.2291	48.2897	23.2536
F12	5	2	b1	5.04	0.0142583	0.6109	0.596642	0.08	0.5309	1.13912	87.7873	45	0.1	450	30	5040	0.0198413	0.9	11.2354	48.2897	23.2668
F12	5	2	b1	5.04	0.0142583	0.6105	0.596242	0.0797	0.5308	1.13912	87.7873	45	0.1	450	30	5040	0.0198413	0.9	11.2333	48.2897	23.2624
F12	5	2	b2	5.04	0.0142583	0.6438	0.629542	0.0642	0.5796	1.13912	87.7873	45	0.1	450	30	5040	0.0198413	0.9	12.2661	48.2897	25.401
F12	5	2	b2	5.04	0.0142583	0.6436	0.629342	0.0636	0.58	1.13912	87.7873	45	0.1	450	30	5040	0.0198413	0.9	12.2745	48.2897	25.4186
F12	5	2	b2	5.04	0.0142583	0.644	0.629742	0.0644	0.5796	1.13912	87.7873	45	0.1	450	30	5040	0.0198413	0.9	12.2661	48.2897	25.401
F18	5	1	a1	5.04	0.0142583	0.7121	0.697842	0.1034	0.6087	1.13912	87.7873	45	0.1	450	30	5040	0.0198413	0.9	12.8819	53.909	23.8957
F18	5	1	a1	5.04	0.0142583	0.7119	0.697642	0.1032	0.6087	1.13912	87.7873	45	0.1	450	30	5040	0.0198413	0.9	12.8819	53.909	23.8957
F18	5	1	a1	5.04	0.0142583	0.7134	0.699142	0.1032	0.6102	1.13912	87.7873	45	0.1	450	30	5040	0.0198413	0.9	12.9137	53.909	23.9546
F18	5	1	a2	5.04	0.0142583	0.7651	0.750842	0.1039	0.6612	1.13912	87.7873	45	0.1	450	30	5040	0.0198413	0.9	13.993	53.909	25.9567
F18	5	1	a2	5.04	0.0142583	0.7669	0.752642	0.1029	0.664	1.13912	87.7873	45	0.1	450	30	5040	0.0198413	0.9	14.0522	53.909	26.0666
F18	5	1	a2	5.04	0.0142583	0.7655	0.751242	0.1025	0.663	1.13912	87.7873	45	0.1	450	30	5040	0.0198413	0.9	14.0311	53.909	26.0274
F18	5	1	b1	5.05	0.0142583	0.7398	0.725542	0.0566	0.6832	1.13912	87.7873	45	0.1	450	30	5050	0.019802	0.9	14.4299	53.909	26.7672
F18	5	1	b1	5.05	0.0142583	0.7397	0.725442	0.0562	0.6835	1.13912	87.7873	45	0.1	450	30	5050	0.019802	0.9	14.4363	53.909	26.779
F18	5	1	b1	5.05	0.0142583	0.7386	0.724342	0.0569	0.6817	1.13912	87.7873	45	0.1	450	30	5050	0.019802	0.9	14.3983	53.909	26.7085
F18	5	1	b2	5.05	0.0142583	0.7615	0.747242	0.055	0.7065	1.13912	87.7873	45	0.1	450	30	5050	0.019802	0.9	14.9221	53.909	27.6801
F18	5	1	b2	5.05	0.0142583	0.7624	0.748142	0.055	0.7074	1.13912	87.7873	45	0.1	450	30	5050	0.019802	0.9	14.9411	53.909	27.7154
F18	5	1	b2	5.05	0.0142583	0.7619	0.747642	0.059	0.7029	1.13912	87.7873	45	0.1	450	30	5050	0.019802	0.9	14.846	53.909	27.5391
F18	5	2	a1	5.05	0.0142583	0.625	0.610742	0.0905	0.5345	1.13912	87.7873	45	0.1	450	30	5050	0.019802	0.9	11.2892	53.909	20.9413
F18	5	2	a1	5.05	0.0142583	0.6254	0.611142	0.0893	0.5361	1.13912	87.7873	45	0.1	450	30	5050	0.019802	0.9	11.323	53.909	21.004
F18	5	2	a1	5.05	0.0142583	0.6252	0.610942	0.0898	0.5354	1.13912	87.7873	45	0.1	450	30	5050	0.019802	0.9	11.3082	53.909	20.9766
F18	5	2	a2	5.05	0.0142583	0.65	0.635742	0.0902	0.5598	1.13912	87.7873	45	0.1	450	30	5050	0.019802	0.9	11.8236	53.909	21.9325
F18	5	2	a2	5.05	0.0142583	0.6509	0.636642	0.09	0.5609	1.13912	87.7873	45	0.1	450	30	5050	0.019802	0.9	11.8468	53.909	21.9756
F18	5	2	a2	5.05	0.0142583	0.6506	0.636342	0.0899	0.5607	1.13912	87.7873	45	0.1	450	30	5050	0.019802	0.9	11.8426	53.909	21.9678
F18	5	2	b1	5.08	0.0142583	0.6933	0.679042	0.1178	0.5755	1.13912	87.7873	45	0.1	450	30	5080	0.019685	0.9	12.0834	53.909	22.4145
F18	5	2	b1	5.08	0.0142583	0.6912	0.676942	0.1183	0.5729	1.13912	87.7873	45	0.1	450	30	5080	0.019685	0.9	12.0288	53.909	22.3132
F18	5	2	b1	5.08	0.0142583	0.6879	0.673642	0.1181	0.5698	1.13912	87.7873	45	0.1	450	30	5080	0.019685	0.9	11.9637	53.909	22.1925
F18	5	2	b2	5.08	0.0142583	0.7111	0.696842	0.1155	0.5956	1.13912	87.7873	45	0.1	450	30	5080	0.019685	0.9	12.5054	53.909	23.1973
F18	5	2	b2	5.08	0.0142583	0.7118	0.697542	0.1148	0.597	1.13912	87.7873	45	0.1	450	30	5080	0.019685	0.9	12.5348	53.909	23.2519
F18	5	2	b2	5.08	0.0142583	0.7112	0.696942	0.1144	0.5968	1.13912	87.7873	45	0.1	450	30	5080	0.019685	0.9	12.5306	53.909	23.2441

## Sheet: Gopod S6
sample ID	Sampling	Batch	replication	Sample weight (g)	A510 blank	A510 sample	Asample-Ablank	Acontrol	Asample-Acontrol (ΔA)	A510 glucose STD	F (100µg glucose/A STD)	Extraction volume (mL)	Volume analized (mL)	Extraction V/Analized V	Dilutions	Sample weight (mg)	100/sample weight	162/180	dig. starch %	wet tot. starch %	dig/tot %		g/100g total starch
F1	6	1	a1	5.09	0.0142583	0.6951	0.680842	0.0148	0.6803	1.13912	87.7873	45	0.1	450	30	5090	0.0196464	0.9	14.2558	61.2394	23.2787		Sampling 6	Mean	SD
F1	6	1	a1	5.09	0.0142583	0.6954	0.681142	0.0145	0.6809	1.13912	87.7873	45	0.1	450	30	5090	0.0196464	0.9	14.2683	61.2394	23.2993		1	21.3822	1.85012				S6	starch dig
F1	6	1	a1	5.09	0.0142583	0.6955	0.681242	0.0151	0.6804	1.13912	87.7873	45	0.1	450	30	5090	0.0196464	0.9	14.2579	61.2394	23.2822		3	24.3352	1.99171				F1	23.2787
F1	6	1	a2	5.09	0.0142583	0.7018	0.687542	0.0289	0.6729	1.13912	87.7873	45	0.1	450	30	5090	0.0196464	0.9	14.1007	61.2394	23.0255		4	19.0156	1.56224				F1	23.2993
F1	6	1	a2	5.09	0.0142583	0.7017	0.687442	0.0283	0.6734	1.13912	87.7873	45	0.1	450	30	5090	0.0196464	0.9	14.1112	61.2394	23.0426		5	18.1503	1.28992				F1	23.2822
F1	6	1	a2	5.09	0.0142583	0.7014	0.687142	0.0286	0.6728	1.13912	87.7873	45	0.1	450	30	5090	0.0196464	0.9	14.0986	61.2394	23.0221		9	23.9346	0.723628				F1	23.0255
F1	6	1	b1	5.06	0.0142583	0.6504	0.636142	0.0249	0.6255	1.13912	87.7873	45	0.1	450	30	5060	0.0197628	0.9	13.1851	61.2394	21.5305		12	28.8334	1.97548				F1	23.0426
F1	6	1	b1	5.06	0.0142583	0.6507	0.636442	0.0243	0.6264	1.13912	87.7873	45	0.1	450	30	5060	0.0197628	0.9	13.2041	61.2394	21.5615		18	25.8551	2.0436				F1	23.0221
F1	6	1	b1	5.06	0.0142583	0.6499	0.635642	0.0253	0.6246	1.13912	87.7873	45	0.1	450	30	5060	0.0197628	0.9	13.1662	61.2394	21.4995								F1	21.5305
F1	6	1	b2	5.06	0.0142583	0.6838	0.669542	0.0294	0.6544	1.13912	87.7873	45	0.1	450	30	5060	0.0197628	0.9	13.7943	61.2394	22.5253								F1	21.5615
F1	6	1	b2	5.06	0.0142583	0.684	0.669742	0.0301	0.6539	1.13912	87.7873	45	0.1	450	30	5060	0.0197628	0.9	13.7838	61.2394	22.508		g/100g porridge						F1	21.4995
F1	6	1	b2	5.06	0.0142583	0.6847	0.670442	0.0299	0.6548	1.13912	87.7873	45	0.1	450	30	5060	0.0197628	0.9	13.8028	61.2394	22.539		Sampling 6	Mean	SD				F1	22.5253
F1	6	2	a1	5.03	0.0142583	0.6435	0.629242	0.0419	0.6016	1.13912	87.7873	45	0.1	450	30	5030	0.0198807	0.9	12.757	61.2394	20.8313		1	13.0741	0.981745				F1	22.508
F1	6	2	a1	5.03	0.0142583	0.645	0.630742	0.0416	0.6034	1.13912	87.7873	45	0.1	450	30	5030	0.0198807	0.9	12.7952	61.2394	20.8936		3	14.0283	1.14814				F1	22.539
F1	6	2	a1	5.03	0.0142583	0.6453	0.631042	0.0416	0.6037	1.13912	87.7873	45	0.1	450	30	5030	0.0198807	0.9	12.8015	61.2394	20.904		4	10.9326	0.89817				F1	20.8313
F1	6	2	a2	5.03	0.0142583	0.6702	0.655942	0.0458	0.6244	1.13912	87.7873	45	0.1	450	30	5030	0.0198807	0.9	13.2405	61.2394	21.6208		5	11.4248	0.811947				F1	20.8936
F1	6	2	a2	5.03	0.0142583	0.6706	0.656342	0.0461	0.6245	1.13912	87.7873	45	0.1	450	30	5030	0.0198807	0.9	13.2426	61.2394	21.6243		9	11.3513	0.343191				F1	20.904
F1	6	2	a2	5.03	0.0142583	0.6704	0.656142	0.0458	0.6246	1.13912	87.7873	45	0.1	450	30	5030	0.0198807	0.9	13.2447	61.2394	21.6277		12	13.9235	0.953955				F1	21.6208
F1	6	2	b1	5.03	0.0142583	0.5763	0.562042	0.0285	0.5478	1.13912	87.7873	45	0.1	450	30	5030	0.0198807	0.9	11.6161	61.2394	18.9684		18	13.9382	1.10168				F1	21.6243
F1	6	2	b1	5.03	0.0142583	0.5753	0.561042	0.0279	0.5474	1.13912	87.7873	45	0.1	450	30	5030	0.0198807	0.9	11.6077	61.2394	18.9546								F1	21.6277
F1	6	2	b1	5.03	0.0142583	0.5762	0.561942	0.0272	0.549	1.13912	87.7873	45	0.1	450	30	5030	0.0198807	0.9	11.6416	61.2394	19.01								F1	18.9684
F1	6	2	b2	5.03	0.0142583	0.59	0.575742	0.0438	0.5462	1.13912	87.7873	45	0.1	450	30	5030	0.0198807	0.9	11.5822	61.2394	18.913								F1	18.9546
F1	6	2	b2	5.03	0.0142583	0.5905	0.576242	0.043	0.5475	1.13912	87.7873	45	0.1	450	30	5030	0.0198807	0.9	11.6098	61.2394	18.958								F1	19.01
F1	6	2	b2	5.03	0.0142583	0.5906	0.576342	0.043	0.5476	1.13912	87.7873	45	0.1	450	30	5030	0.0198807	0.9	11.6119	61.2394	18.9615								F1	18.913
F3	6	1	a1	5.04	0.0142583	0.7251	0.710842	0.1095	0.6156	1.13912	87.7873	45	0.1	450	30	5040	0.0198413	0.9	13.028	57.6461	22.5999								F1	18.958
F3	6	1	a1	5.04	0.0142583	0.7241	0.709842	0.109	0.6151	1.13912	87.7873	45	0.1	450	30	5040	0.0198413	0.9	13.0174	57.6461	22.5815								F1	18.9615
F3	6	1	a1	5.04	0.0142583	0.7251	0.710842	0.1084	0.6167	1.13912	87.7873	45	0.1	450	30	5040	0.0198413	0.9	13.0512	57.6461	22.6403								F3	22.5999
F3	6	1	a2	5.04	0.0142583	0.7423	0.728042	0.1102	0.6321	1.13912	87.7873	45	0.1	450	30	5040	0.0198413	0.9	13.3771	57.6461	23.2056								F3	22.5815
F3	6	1	a2	5.04	0.0142583	0.7422	0.727942	0.1106	0.6316	1.13912	87.7873	45	0.1	450	30	5040	0.0198413	0.9	13.3666	57.6461	23.1873								F3	22.6403
F3	6	1	a2	5.04	0.0142583	0.7417	0.727442	0.1107	0.631	1.13912	87.7873	45	0.1	450	30	5040	0.0198413	0.9	13.3539	57.6461	23.1653								F3	23.2056
F3	6	1	b1	5.03	0.0142583	0.6899	0.675642	0.1129	0.577	1.13912	87.7873	45	0.1	450	30	5030	0.0198807	0.9	12.2353	57.6461	21.2249								F3	23.1873
F3	6	1	b1	5.03	0.0142583	0.6907	0.676442	0.1125	0.5782	1.13912	87.7873	45	0.1	450	30	5030	0.0198807	0.9	12.2608	57.6461	21.2691								F3	23.1653
F3	6	1	b1	5.03	0.0142583	0.6906	0.676342	0.1124	0.5782	1.13912	87.7873	45	0.1	450	30	5030	0.0198807	0.9	12.2608	57.6461	21.2691								F3	21.2249
F3	6	1	b2	5.03	0.0142583	0.7347	0.720442	0.1066	0.6281	1.13912	87.7873	45	0.1	450	30	5030	0.0198807	0.9	13.3189	57.6461	23.1046								F3	21.2691
F3	6	1	b2	5.03	0.0142583	0.7352	0.720942	0.1071	0.6281	1.13912	87.7873	45	0.1	450	30	5030	0.0198807	0.9	13.3189	57.6461	23.1046								F3	21.2691
F3	6	1	b2	5.03	0.0142583	0.735	0.720742	0.1062	0.6288	1.13912	87.7873	45	0.1	450	30	5030	0.0198807	0.9	13.3338	57.6461	23.1304								F3	23.1046
F3	6	2	a1	5.06	0.0142583	0.855	0.840742	0.1061	0.7489	1.13912	87.7873	45	0.1	450	30	5060	0.0197628	0.9	15.7863	57.6461	27.3849								F3	23.1046
F3	6	2	a1	5.06	0.0142583	0.8543	0.840042	0.1064	0.7479	1.13912	87.7873	45	0.1	450	30	5060	0.0197628	0.9	15.7653	57.6461	27.3484								F3	23.1304
F3	6	2	a1	5.06	0.0142583	0.8561	0.841842	0.1061	0.75	1.13912	87.7873	45	0.1	450	30	5060	0.0197628	0.9	15.8095	57.6461	27.4252								F3	27.3849
F3	6	2	a2	5.06	0.0142583	0.7931	0.778842	0.0932	0.6999	1.13912	87.7873	45	0.1	450	30	5060	0.0197628	0.9	14.7534	57.6461	25.5932								F3	27.3484
F3	6	2	a2	5.06	0.0142583	0.7944	0.780142	0.0923	0.7021	1.13912	87.7873	45	0.1	450	30	5060	0.0197628	0.9	14.7998	57.6461	25.6736								F3	27.4252
F3	6	2	a2	5.06	0.0142583	0.7938	0.779542	0.0915	0.7023	1.13912	87.7873	45	0.1	450	30	5060	0.0197628	0.9	14.804	57.6461	25.6809								F3	25.5932
F3	6	2	b1	5.05	0.0142583	0.7854	0.771142	0.0756	0.7098	1.13912	87.7873	45	0.1	450	30	5050	0.019802	0.9	14.9918	57.6461	26.0066								F3	25.6736
F3	6	2	b1	5.05	0.0142583	0.7845	0.770242	0.076	0.7085	1.13912	87.7873	45	0.1	450	30	5050	0.019802	0.9	14.9643	57.6461	25.9589								F3	25.6809
F3	6	2	b1	5.05	0.0142583	0.7853	0.771042	0.0758	0.7095	1.13912	87.7873	45	0.1	450	30	5050	0.019802	0.9	14.9854	57.6461	25.9956								F3	26.0066
F3	6	2	b2	5.05	0.0142583	0.7936	0.779342	0.0969	0.6967	1.13912	87.7873	45	0.1	450	30	5050	0.019802	0.9	14.7151	57.6461	25.5266								F3	25.9589
F3	6	2	b2	5.05	0.0142583	0.7928	0.778542	0.0969	0.6959	1.13912	87.7873	45	0.1	450	30	5050	0.019802	0.9	14.6982	57.6461	25.4973								F3	25.9956
F3	6	2	b2	5.05	0.0142583	0.7929	0.778642	0.0977	0.6952	1.13912	87.7873	45	0.1	450	30	5050	0.019802	0.9	14.6834	57.6461	25.4716								F3	25.5266
F4	6	1	a1	5.05	0.0142583	0.5763	0.562042	0.0866	0.4897	1.13912	87.7873	45	0.1	450	30	5050	0.019802	0.9	10.343	57.4925	17.9902								F3	25.4973
F4	6	1	a1	5.05	0.0142583	0.5771	0.562842	0.0873	0.4898	1.13912	87.7873	45	0.1	450	30	5050	0.019802	0.9	10.3451	57.4925	17.9939								F3	25.4716
F4	6	1	a1	5.05	0.0142583	0.5776	0.563342	0.086	0.4916	1.13912	87.7873	45	0.1	450	30	5050	0.019802	0.9	10.3831	57.4925	18.06								F4	17.9902
F4	6	1	a2	5.05	0.0142583	0.613	0.598742	0.083	0.53	1.13912	87.7873	45	0.1	450	30	5050	0.019802	0.9	11.1942	57.4925	19.4707								F4	17.9939
F4	6	1	a2	5.05	0.0142583	0.6128	0.598542	0.0837	0.5291	1.13912	87.7873	45	0.1	450	30	5050	0.019802	0.9	11.1752	57.4925	19.4376								F4	18.06
F4	6	1	a2	5.05	0.0142583	0.6133	0.599042	0.084	0.5293	1.13912	87.7873	45	0.1	450	30	5050	0.019802	0.9	11.1794	57.4925	19.445								F4	19.4707
F4	6	1	b1	5.04	0.0142583	0.5824	0.568142	0.0933	0.4891	1.13912	87.7873	45	0.1	450	30	5040	0.0198413	0.9	10.3508	57.4925	18.0038								F4	19.4376
F4	6	1	b1	5.04	0.0142583	0.5822	0.567942	0.0933	0.4889	1.13912	87.7873	45	0.1	450	30	5040	0.0198413	0.9	10.3466	57.4925	17.9964								F4	19.445
F4	6	1	b1	5.04	0.0142583	0.582	0.567742	0.0932	0.4888	1.13912	87.7873	45	0.1	450	30	5040	0.0198413	0.9	10.3445	57.4925	17.9927								F4	18.0038
F4	6	1	b2	5.04	0.0142583	0.6204	0.606142	0.0736	0.5468	1.13912	87.7873	45	0.1	450	30	5040	0.0198413	0.9	11.5719	57.4925	20.1277								F4	17.9964
F4	6	1	b2	5.04	0.0142583	0.6207	0.606442	0.0742	0.5465	1.13912	87.7873	45	0.1	450	30	5040	0.0198413	0.9	11.5656	57.4925	20.1167								F4	17.9927
F4	6	1	b2	5.04	0.0142583	0.6199	0.605642	0.0742	0.5457	1.13912	87.7873	45	0.1	450	30	5040	0.0198413	0.9	11.5487	57.4925	20.0872								F4	20.1277
F4	6	2	a1	5.06	0.0142583	0.624	0.609742	0.0615	0.5625	1.13912	87.7873	45	0.1	450	30	5060	0.0197628	0.9	11.8571	57.4925	20.6238								F4	20.1167
F4	6	2	a1	5.06	0.0142583	0.6243	0.610042	0.0612	0.5631	1.13912	87.7873	45	0.1	450	30	5060	0.0197628	0.9	11.8698	57.4925	20.6458								F4	20.0872
F4	6	2	a1	5.06	0.0142583	0.6241	0.609842	0.0607	0.5634	1.13912	87.7873	45	0.1	450	30	5060	0.0197628	0.9	11.8761	57.4925	20.6568								F4	20.6238
F4	6	2	a2	5.06	0.0142583	0.6624	0.648142	0.078	0.5844	1.13912	87.7873	45	0.1	450	30	5060	0.0197628	0.9	12.3188	57.4925	21.4268								F4	20.6458
F4	6	2	a2	5.06	0.0142583	0.6622	0.647942	0.077	0.5852	1.13912	87.7873	45	0.1	450	30	5060	0.0197628	0.9	12.3356	57.4925	21.4561								F4	20.6568
F4	6	2	a2	5.06	0.0142583	0.662	0.647742	0.077	0.585	1.13912	87.7873	45	0.1	450	30	5060	0.0197628	0.9	12.3314	57.4925	21.4488								F4	21.4268
F4	6	2	b1	5.03	0.0142583	0.5515	0.537242	0.0914	0.4601	1.13912	87.7873	45	0.1	450	30	5030	0.0198807	0.9	9.75646	57.4925	16.97								F4	21.4561
F4	6	2	b1	5.03	0.0142583	0.5483	0.534042	0.0975	0.4508	1.13912	87.7873	45	0.1	450	30	5030	0.0198807	0.9	9.55925	57.4925	16.627								F4	21.4488
F4	6	2	b1	5.03	0.0142583	0.5457	0.531442	0.0854	0.4603	1.13912	87.7873	45	0.1	450	30	5030	0.0198807	0.9	9.7607	57.4925	16.9773								F4	16.97
F4	6	2	b2	5.03	0.0142583	0.593	0.578742	0.1052	0.4878	1.13912	87.7873	45	0.1	450	30	5030	0.0198807	0.9	10.3438	57.4925	17.9916								F4	16.627
F4	6	2	b2	5.03	0.0142583	0.5774	0.563142	0.1047	0.4727	1.13912	87.7873	45	0.1	450	30	5030	0.0198807	0.9	10.0236	57.4925	17.4347								F4	16.9773
F4	6	2	b2	5.03	0.0142583	0.5768	0.562542	0.1052	0.4716	1.13912	87.7873	45	0.1	450	30	5030	0.0198807	0.9	10.0003	57.4925	17.3941								F4	17.9916
F5	6	1	a1	5.04	0.0142583	0.6234	0.609142	0.0915	0.5319	1.13912	87.7873	45	0.1	450	30	5040	0.0198413	0.9	11.2566	62.9454	17.8831								F4	17.4347
F5	6	1	a1	5.04	0.0142583	0.6236	0.609342	0.0926	0.531	1.13912	87.7873	45	0.1	450	30	5040	0.0198413	0.9	11.2376	62.9454	17.8529								F4	17.3941
F5	6	1	a1	5.04	0.0142583	0.6222	0.607942	0.0932	0.529	1.13912	87.7873	45	0.1	450	30	5040	0.0198413	0.9	11.1952	62.9454	17.7856								F5	17.8831
F5	6	1	a2	5.04	0.0142583	0.6754	0.661142	0.1121	0.5633	1.13912	87.7873	45	0.1	450	30	5040	0.0198413	0.9	11.9211	62.9454	18.9388								F5	17.8529
F5	6	1	a2	5.04	0.0142583	0.6772	0.662942	0.1119	0.5653	1.13912	87.7873	45	0.1	450	30	5040	0.0198413	0.9	11.9635	62.9454	19.0061								F5	17.7856
F5	6	1	a2	5.04	0.0142583	0.677	0.662742	0.1122	0.5648	1.13912	87.7873	45	0.1	450	30	5040	0.0198413	0.9	11.9529	62.9454	18.9893								F5	18.9388
F5	6	1	b1	5.08	0.0142583	0.6726	0.658342	0.1164	0.5562	1.13912	87.7873	45	0.1	450	30	5080	0.019685	0.9	11.6782	62.9454	18.5529								F5	19.0061
F5	6	1	b1	5.08	0.0142583	0.6709	0.656642	0.1154	0.5555	1.13912	87.7873	45	0.1	450	30	5080	0.019685	0.9	11.6635	62.9454	18.5295								F5	18.9893
F5	6	1	b1	5.08	0.0142583	0.6715	0.657242	0.1158	0.5557	1.13912	87.7873	45	0.1	450	30	5080	0.019685	0.9	11.6677	62.9454	18.5362								F5	18.5529
F5	6	1	b2	5.08	0.0142583	0.7022	0.687942	0.1085	0.5937	1.13912	87.7873	45	0.1	450	30	5080	0.019685	0.9	12.4655	62.9454	19.8037								F5	18.5295
F5	6	1	b2	5.08	0.0142583	0.7038	0.689542	0.1085	0.5953	1.13912	87.7873	45	0.1	450	30	5080	0.019685	0.9	12.4991	62.9454	19.8571								F5	18.5362
F5	6	1	b2	5.08	0.0142583	0.7045	0.690242	0.1086	0.5959	1.13912	87.7873	45	0.1	450	30	5080	0.019685	0.9	12.5117	62.9454	19.8771								F5	19.8037
F5	6	2	a1	5.06	0.0142583	0.6861	0.671842	0.1055	0.5806	1.13912	87.7873	45	0.1	450	30	5060	0.0197628	0.9	12.2387	62.9454	19.4433								F5	19.8571
F5	6	2	a1	5.06	0.0142583	0.6862	0.671942	0.1057	0.5805	1.13912	87.7873	45	0.1	450	30	5060	0.0197628	0.9	12.2366	62.9454	19.44								F5	19.8771
F5	6	2	a1	5.06	0.0142583	0.6852	0.670942	0.1046	0.5806	1.13912	87.7873	45	0.1	450	30	5060	0.0197628	0.9	12.2387	62.9454	19.4433								F5	19.4433
F5	6	2	a2	5.06	0.0142583	0.6369	0.622642	0.1051	0.5318	1.13912	87.7873	45	0.1	450	30	5060	0.0197628	0.9	11.21	62.9454	17.8091								F5	19.44
F5	6	2	a2	5.06	0.0142583	0.6372	0.622942	0.1042	0.533	1.13912	87.7873	45	0.1	450	30	5060	0.0197628	0.9	11.2353	62.9454	17.8493								F5	19.4433
F5	6	2	a2	5.06	0.0142583	0.6379	0.623642	0.1047	0.5332	1.13912	87.7873	45	0.1	450	30	5060	0.0197628	0.9	11.2395	62.9454	17.856								F5	17.8091
F5	6	2	b1	5.05	0.0142583	0.6133	0.599042	0.1441	0.4692	1.13912	87.7873	45	0.1	450	30	5050	0.019802	0.9	9.91002	62.9454	15.7438								F5	17.8493
F5	6	2	b1	5.05	0.0142583	0.6132	0.598942	0.1434	0.4698	1.13912	87.7873	45	0.1	450	30	5050	0.019802	0.9	9.9227	62.9454	15.764								F5	17.856
F5	6	2	b1	5.05	0.0142583	0.6129	0.598642	0.1444	0.4685	1.13912	87.7873	45	0.1	450	30	5050	0.019802	0.9	9.89524	62.9454	15.7204								F5	15.7438
F5	6	2	b2	5.05	0.0142583	0.6245	0.610242	0.1187	0.5058	1.13912	87.7873	45	0.1	450	30	5050	0.019802	0.9	10.6831	62.9454	16.9719								F5	15.764
F5	6	2	b2	5.05	0.0142583	0.6244	0.610142	0.1175	0.5069	1.13912	87.7873	45	0.1	450	30	5050	0.019802	0.9	10.7063	62.9454	17.0088								F5	15.7204
F5	6	2	b2	5.05	0.0142583	0.6222	0.607942	0.1172	0.505	1.13912	87.7873	45	0.1	450	30	5050	0.019802	0.9	10.6662	62.9454	16.9451								F5	16.9719
F9	6	1	a1	5.03	0.0142583	0.5439	0.529642	0.0334	0.5105	1.13912	87.7873	45	0.1	450	30	5030	0.0198807	0.9	10.8252	47.4264	22.8253								F5	17.0088
F9	6	1	a1	5.03	0.0142583	0.5435	0.529242	0.0329	0.5106	1.13912	87.7873	45	0.1	450	30	5030	0.0198807	0.9	10.8273	47.4264	22.8297								F5	16.9451
F9	6	1	a1	5.03	0.0142583	0.5422	0.527942	0.0334	0.5088	1.13912	87.7873	45	0.1	450	30	5030	0.0198807	0.9	10.7891	47.4264	22.7492
F9	6	1	a2	5.03	0.0142583	0.5629	0.548642	0.0334	0.5295	1.13912	87.7873	45	0.1	450	30	5030	0.0198807	0.9	11.2281	47.4264	23.6748
F9	6	1	a2	5.03	0.0142583	0.5638	0.549542	0.0345	0.5293	1.13912	87.7873	45	0.1	450	30	5030	0.0198807	0.9	11.2239	47.4264	23.6658
F9	6	1	a2	5.03	0.0142583	0.563	0.548742	0.0348	0.5282	1.13912	87.7873	45	0.1	450	30	5030	0.0198807	0.9	11.2005	47.4264	23.6167
F9	6	1	b1	5.04	0.0142583	0.5772	0.562942	0.0315	0.5457	1.13912	87.7873	45	0.1	450	30	5040	0.0198413	0.9	11.5487	47.4264	24.3507
F9	6	1	b1	5.04	0.0142583	0.5745	0.560242	0.0319	0.5426	1.13912	87.7873	45	0.1	450	30	5040	0.0198413	0.9	11.4831	47.4264	24.2124
F9	6	1	b1	5.04	0.0142583	0.5743	0.560042	0.0328	0.5415	1.13912	87.7873	45	0.1	450	30	5040	0.0198413	0.9	11.4598	47.4264	24.1633
F9	6	1	b2	5.04	0.0142583	0.5901	0.575842	0.0336	0.5565	1.13912	87.7873	45	0.1	450	30	5040	0.0198413	0.9	11.7772	47.4264	24.8326
F9	6	1	b2	5.04	0.0142583	0.5909	0.576642	0.0339	0.557	1.13912	87.7873	45	0.1	450	30	5040	0.0198413	0.9	11.7878	47.4264	24.8549
F9	6	1	b2	5.04	0.0142583	0.5914	0.577142	0.0337	0.5577	1.13912	87.7873	45	0.1	450	30	5040	0.0198413	0.9	11.8026	47.4264	24.8862
F9	6	2	a1	5.06	0.0142583	0.5463	0.532042	0.0284	0.5179	1.13912	87.7873	45	0.1	450	30	5060	0.0197628	0.9	10.917	47.4264	23.0188
F9	6	2	a1	5.06	0.0142583	0.5466	0.532342	0.0281	0.5185	1.13912	87.7873	45	0.1	450	30	5060	0.0197628	0.9	10.9297	47.4264	23.0455
F9	6	2	a1	5.06	0.0142583	0.5453	0.531042	0.0289	0.5164	1.13912	87.7873	45	0.1	450	30	5060	0.0197628	0.9	10.8854	47.4264	22.9522
F9	6	2	a2	5.06	0.0142583	0.5497	0.535442	0.0126	0.5371	1.13912	87.7873	45	0.1	450	30	5060	0.0197628	0.9	11.3217	47.4264	23.8722
F9	6	2	a2	5.06	0.0142583	0.5501	0.535842	0.0126	0.5375	1.13912	87.7873	45	0.1	450	30	5060	0.0197628	0.9	11.3302	47.4264	23.89
F9	6	2	a2	5.06	0.0142583	0.5496	0.535342	0.0126	0.537	1.13912	87.7873	45	0.1	450	30	5060	0.0197628	0.9	11.3196	47.4264	23.8678
F9	6	2	b1	5.09	0.0142583	0.5603	0.546042	0.0122	0.5481	1.13912	87.7873	45	0.1	450	30	5090	0.0196464	0.9	11.4855	47.4264	24.2175
F9	6	2	b1	5.09	0.0142583	0.5608	0.546542	0.0116	0.5492	1.13912	87.7873	45	0.1	450	30	5090	0.0196464	0.9	11.5086	47.4264	24.2661
F9	6	2	b1	5.09	0.0142583	0.5615	0.547242	0.0119	0.5496	1.13912	87.7873	45	0.1	450	30	5090	0.0196464	0.9	11.5169	47.4264	24.2838
F9	6	2	b2	5.09	0.0142583	0.5852	0.570942	0.0245	0.5607	1.13912	87.7873	45	0.1	450	30	5090	0.0196464	0.9	11.7495	47.4264	24.7743
F9	6	2	b2	5.09	0.0142583	0.5854	0.571142	0.0248	0.5606	1.13912	87.7873	45	0.1	450	30	5090	0.0196464	0.9	11.7474	47.4264	24.7698
F9	6	2	b2	5.09	0.0142583	0.5853	0.571042	0.0238	0.5615	1.13912	87.7873	45	0.1	450	30	5090	0.0196464	0.9	11.7663	47.4264	24.8096
F12	6	1	a1	5.02	0.0142583	0.7654	0.751142	0.0825	0.6829	1.13912	87.7873	45	0.1	450	30	5020	0.0199203	0.9	14.5098	48.2897	30.0474
F12	6	1	a1	5.02	0.0142583	0.7658	0.751542	0.0824	0.6834	1.13912	87.7873	45	0.1	450	30	5020	0.0199203	0.9	14.5204	48.2897	30.0694
F12	6	1	a1	5.02	0.0142583	0.7662	0.751942	0.0829	0.6833	1.13912	87.7873	45	0.1	450	30	5020	0.0199203	0.9	14.5183	48.2897	30.065
F12	6	1	a2	5.02	0.0142583	0.81	0.795742	0.0881	0.7219	1.13912	87.7873	45	0.1	450	30	5020	0.0199203	0.9	15.3384	48.2897	31.7634
F12	6	1	a2	5.02	0.0142583	0.8096	0.795342	0.0889	0.7207	1.13912	87.7873	45	0.1	450	30	5020	0.0199203	0.9	15.313	48.2897	31.7106
F12	6	1	a2	5.02	0.0142583	0.8107	0.796442	0.089	0.7217	1.13912	87.7873	45	0.1	450	30	5020	0.0199203	0.9	15.3342	48.2897	31.7546
F12	6	1	b1	5.07	0.0142583	0.7564	0.742142	0.0639	0.6925	1.13912	87.7873	45	0.1	450	30	5070	0.0197239	0.9	14.5687	48.2897	30.1693
F12	6	1	b1	5.07	0.0142583	0.7561	0.741842	0.0683	0.6878	1.13912	87.7873	45	0.1	450	30	5070	0.0197239	0.9	14.4698	48.2897	29.9646
F12	6	1	b1	5.07	0.0142583	0.7572	0.742942	0.0627	0.6945	1.13912	87.7873	45	0.1	450	30	5070	0.0197239	0.9	14.6107	48.2897	30.2564
F12	6	1	b2	5.07	0.0142583	0.7757	0.761442	0.0738	0.7019	1.13912	87.7873	45	0.1	450	30	5070	0.0197239	0.9	14.7664	48.2897	30.5788
F12	6	1	b2	5.07	0.0142583	0.7743	0.760042	0.0735	0.7008	1.13912	87.7873	45	0.1	450	30	5070	0.0197239	0.9	14.7433	48.2897	30.5309
F12	6	1	b2	5.07	0.0142583	0.7736	0.759342	0.0732	0.7004	1.13912	87.7873	45	0.1	450	30	5070	0.0197239	0.9	14.7349	48.2897	30.5135
F12	6	2	a1	5.05	0.0142583	0.6739	0.659642	0.0633	0.6106	1.13912	87.7873	45	0.1	450	30	5050	0.019802	0.9	12.8965	48.2897	26.7066
F12	6	2	a1	5.05	0.0142583	0.6733	0.659042	0.0623	0.611	1.13912	87.7873	45	0.1	450	30	5050	0.019802	0.9	12.905	48.2897	26.7241
F12	6	2	a1	5.05	0.0142583	0.6736	0.659342	0.0625	0.6111	1.13912	87.7873	45	0.1	450	30	5050	0.019802	0.9	12.9071	48.2897	26.7285
F12	6	2	a2	5.05	0.0142583	0.6825	0.668242	0.0786	0.6039	1.13912	87.7873	45	0.1	450	30	5050	0.019802	0.9	12.755	48.2897	26.4136
F12	6	2	a2	5.05	0.0142583	0.6816	0.667342	0.0789	0.6027	1.13912	87.7873	45	0.1	450	30	5050	0.019802	0.9	12.7297	48.2897	26.3611
F12	6	2	a2	5.05	0.0142583	0.6815	0.667242	0.0792	0.6023	1.13912	87.7873	45	0.1	450	30	5050	0.019802	0.9	12.7212	48.2897	26.3436
F12	6	2	b1	5.04	0.0142583	0.689	0.674742	0.0798	0.6092	1.13912	87.7873	45	0.1	450	30	5040	0.0198413	0.9	12.8925	48.2897	26.6983
F12	6	2	b1	5.04	0.0142583	0.6885	0.674242	0.08	0.6085	1.13912	87.7873	45	0.1	450	30	5040	0.0198413	0.9	12.8777	48.2897	26.6676
F12	6	2	b1	5.04	0.0142583	0.6883	0.674042	0.0797	0.6086	1.13912	87.7873	45	0.1	450	30	5040	0.0198413	0.9	12.8798	48.2897	26.672
F12	6	2	b2	5.04	0.0142583	0.7132	0.698942	0.0642	0.649	1.13912	87.7873	45	0.1	450	30	5040	0.0198413	0.9	13.7348	48.2897	28.4425
F12	6	2	b2	5.04	0.0142583	0.7121	0.697842	0.0636	0.6485	1.13912	87.7873	45	0.1	450	30	5040	0.0198413	0.9	13.7242	48.2897	28.4206
F12	6	2	b2	5.04	0.0142583	0.7124	0.698142	0.0644	0.648	1.13912	87.7873	45	0.1	450	30	5040	0.0198413	0.9	13.7136	48.2897	28.3987
F18	6	1	a1	5.04	0.0142583	0.7679	0.753642	0.1034	0.6645	1.13912	87.7873	45	0.1	450	30	5040	0.0198413	0.9	14.0628	53.909	26.0862
F18	6	1	a1	5.04	0.0142583	0.7679	0.753642	0.1032	0.6647	1.13912	87.7873	45	0.1	450	30	5040	0.0198413	0.9	14.0671	53.909	26.0941
F18	6	1	a1	5.04	0.0142583	0.7681	0.753842	0.1032	0.6649	1.13912	87.7873	45	0.1	450	30	5040	0.0198413	0.9	14.0713	53.909	26.1019
F18	6	1	a2	5.04	0.0142583	0.8457	0.831442	0.1039	0.7418	1.13912	87.7873	45	0.1	450	30	5040	0.0198413	0.9	15.6987	53.909	29.1208
F18	6	1	a2	5.04	0.0142583	0.8484	0.834142	0.1029	0.7455	1.13912	87.7873	45	0.1	450	30	5040	0.0198413	0.9	15.777	53.909	29.2661
F18	6	1	a2	5.04	0.0142583	0.8462	0.831942	0.1025	0.7437	1.13912	87.7873	45	0.1	450	30	5040	0.0198413	0.9	15.7389	53.909	29.1954
F18	6	1	b1	5.05	0.0142583	0.7481	0.733842	0.0566	0.6915	1.13912	87.7873	45	0.1	450	30	5050	0.019802	0.9	14.6052	53.909	27.0924
F18	6	1	b1	5.05	0.0142583	0.7467	0.732442	0.0562	0.6905	1.13912	87.7873	45	0.1	450	30	5050	0.019802	0.9	14.5841	53.909	27.0532
F18	6	1	b1	5.05	0.0142583	0.7463	0.732042	0.0569	0.6894	1.13912	87.7873	45	0.1	450	30	5050	0.019802	0.9	14.5609	53.909	27.0102
F18	6	1	b2	5.05	0.0142583	0.7731	0.758842	0.055	0.7181	1.13912	87.7873	45	0.1	450	30	5050	0.019802	0.9	15.1671	53.909	28.1346
F18	6	1	b2	5.05	0.0142583	0.7739	0.759642	0.055	0.7189	1.13912	87.7873	45	0.1	450	30	5050	0.019802	0.9	15.184	53.909	28.1659
F18	6	1	b2	5.05	0.0142583	0.7733	0.759042	0.059	0.7143	1.13912	87.7873	45	0.1	450	30	5050	0.019802	0.9	15.0868	53.909	27.9857
F18	6	2	a1	5.05	0.0142583	0.7007	0.686442	0.0905	0.6102	1.13912	87.7873	45	0.1	450	30	5050	0.019802	0.9	12.8881	53.909	23.9072
F18	6	2	a1	5.05	0.0142583	0.6999	0.685642	0.0893	0.6106	1.13912	87.7873	45	0.1	450	30	5050	0.019802	0.9	12.8965	53.909	23.9228
F18	6	2	a1	5.05	0.0142583	0.7007	0.686442	0.0898	0.6109	1.13912	87.7873	45	0.1	450	30	5050	0.019802	0.9	12.9029	53.909	23.9346
F18	6	2	a2	5.05	0.0142583	0.7215	0.707242	0.0902	0.6313	1.13912	87.7873	45	0.1	450	30	5050	0.019802	0.9	13.3338	53.909	24.7338
F18	6	2	a2	5.05	0.0142583	0.7201	0.705842	0.09	0.6301	1.13912	87.7873	45	0.1	450	30	5050	0.019802	0.9	13.3084	53.909	24.6868
F18	6	2	a2	5.05	0.0142583	0.7203	0.706042	0.0899	0.6304	1.13912	87.7873	45	0.1	450	30	5050	0.019802	0.9	13.3147	53.909	24.6986
F18	6	2	b1	5.08	0.0142583	0.7097	0.695442	0.1178	0.5919	1.13912	87.7873	45	0.1	450	30	5080	0.019685	0.9	12.4278	53.909	23.0532
F18	6	2	b1	5.08	0.0142583	0.7084	0.694142	0.1183	0.5901	1.13912	87.7873	45	0.1	450	30	5080	0.019685	0.9	12.39	53.909	22.9831
F18	6	2	b1	5.08	0.0142583	0.7082	0.693942	0.1181	0.5901	1.13912	87.7873	45	0.1	450	30	5080	0.019685	0.9	12.39	53.909	22.9831
F18	6	2	b2	5.08	0.0142583	0.7514	0.737142	0.1155	0.6359	1.13912	87.7873	45	0.1	450	30	5080	0.019685	0.9	13.3516	53.909	24.7669
F18	6	2	b2	5.08	0.0142583	0.7507	0.736442	0.1148	0.6359	1.13912	87.7873	45	0.1	450	30	5080	0.019685	0.9	13.3516	53.909	24.7669
F18	6	2	b2	5.08	0.0142583	0.7506	0.736342	0.1144	0.6362	1.13912	87.7873	45	0.1	450	30	5080	0.019685	0.9	13.3579	53.909	24.7786

## Sheet: Graph 100g total starch
		g/100g total starch				g/100g total starch				g/100g total starch				g/100g total starch				g/100g total starch				g/100g total starch
		Sampling 1	Mean	SD		Sampling 2	Mean	SD		Sampling 3	Mean	SD		Sampling 4	Mean	SD		Sampling 5	Mean	SD		Sampling 6	Mean	SD
		1	0.191518	0.000960846		1	0.242086	0.137692		1	16.9165	1.83844		1	19.706	2.17936		1	21.9065	1.96749		1	21.3822	1.85012
		3	0.203754	0.000461259		3	0.465304	0.353619		3	17.3688	1.26348		3	21.2621	1.18358		3	24.258	0.857382		3	24.3352	1.99171
		4	0.204299	0.000462491		4	0.307114	0.106526		4	16.1492	1.44158		4	17.4799	1.89495		4	19.6545	1.95342		4	19.0156	1.56224
		5	0.18614	0.000555356		5	0.362383	0.202889		5	13.6554	1.05294		5	15.592	1.47568		5	16.4938	2.20987		5	18.1503	1.28992
		9	0.247174	0.0011419		9	0.245536	0.134221		9	19.9584	0.854031		9	21.4541	1.12815		9	23.4481	0.814406		9	23.9346	0.723628
		12	0.243235	0.000887881		12	0.225952	0.145424		12	21.4844	0.994817		12	23.7928	2.51256		12	27.1538	2.75444		12	28.8334	1.97548
		18	0.217449	0.000657396		18	0.376818	0.0646587		18	19.2163	1.5224		18	22.2559	1.91559		18	24.0999	2.33089		18	25.8551	2.0436
		Sampling 2	Sampling 3	Sampling 4	Sampling 5	Sampling 6																					S2	S3	S4	S5	S6
PUMPKIN		Gastric	Intestinal	Intestinal	Intestinal	Intestinal																				F1	a	bc	c	c	b
		G - 120 min	I - 15 min	I - 30 min	I - 60 min	I - 120 min																				F3	b	c	d	d	c
		0	15	30	60	120																				F4	ab	b	b	b	a
F1	SP	0.242086	16.9165	19.706	21.9065	21.3822																				F5	ab	a	a	a	a
F3	FSP	0.465304	17.3688	21.2621	24.258	24.3352
F4	CnGP	0.307114	16.1492	17.4799	19.6545	19.0156																				Sample	Intestinal phase
F5	CGP	0.362383	13.6554	15.592	16.4938	18.1503																					0	15	30	60	120
																										SP	0,24±1,14a	16,92±1,84bc	19,71±2,18c	21,91±1,97c	21,38±1,85b
		SD 0	SD 15	SD 30	SD 60	SD 120																				FSP	0,47±0,35b	17,37±1,26c	21,26±1,18d	24,26±0,86d	24,34±1,99c
F1		0.137692	1.83844	2.17936	1.96749	1.85012																				FFSPNG	0,31±0,11ab	16,15±1,44b	17,48±1,9b	19,65±1,95b	19,02±1,56a
F3		0.353619	1.26348	1.18358	0.857382	1.99171																				FFSPG	0,36±0,2ab	13,66±1,05a	15,59±1,48a	16,49±2,21a	18,15±1,29a
F4		0.106526	1.44158	1.89495	1.95342	1.56224
F5		0.202889	1.05294	1.47568	2.20987	1.28992

## Sheet: Graph 100g porridge
g/100g porridge				g/100g porridge				g/100g porridge				g/100g porridge				g/100g porridge				g/100g porridge
Sampling 1	Mean	SD		Sampling 2	Mean	SD		Sampling 3	Mean	SD		Sampling 4	Mean	SD		Sampling 5	Mean	SD		Sampling 6	Mean	SD
1	11.7284	0.0588417		1	0.148252	0.0843218		1	10.3596	1.12585		1	11.8418	1.21989		1	13.3333	1.04659		1	13.0741	0.981745
3	11.7456	0.0265897		3	0.26823	0.203847		3	10.0124	0.728348		3	12.2568	0.682285		3	13.9838	0.494247		3	14.0283	1.14814
4	11.7456	0.0265897		4	0.176567	0.0612445		4	9.28457	0.828798		4	10.0496	1.08946		4	11.2999	1.12307		4	10.9326	0.89817
5	11.7166	0.0349571		5	0.228104	0.127709		5	8.59543	0.662777		5	9.81444	0.928872		5	10.3821	1.39101		5	11.4248	0.811947
9	11.7226	0.0541564		9	0.116449	0.0636563		9	9.46554	0.405036		9	10.1749	0.53504		9	11.1206	0.386243		9	11.3513	0.343191
12	11.7457	0.0428755		12	0.109111	0.0702249		12	10.3748	0.480394		12	11.4895	1.21331		12	13.1125	1.33011		12	13.9235	0.953955
18	11.7224	0.0354396		18	0.203139	0.0348568		18	10.3593	0.820708		18	11.9979	1.03267		18	12.992	1.25656		18	13.9382	1.10168
	Sampling 2	Sampling 3	Sampling 4	Sampling 5	Sampling 6
PUMPKIN	Gastric	Intestinal	Intestinal	Intestinal	Intestinal
	G - 120 min	I - 15 min	I - 30 min	I - 60 min	I - 120 min
	0	15	30	60	120
F1	0.148252	10.3596	11.8418	13.3333	13.0741
F3	0.26823	10.0124	12.2568	13.9838	14.0283
F4	0.176567	9.28457	10.0496	11.2999	10.9326
F5	0.228104	8.59543	9.81444	10.3821	11.4248
	SD 0	SD 15	SD 30	SD 60	SD 120
F1	0.0843218	1.12585	1.21989	1.04659	0.981745
F3	0.203847	0.728348	0.682285	0.494247	1.14814
F4	0.0612445	0.828798	1.08946	1.12307	0.89817
F5	0.127709	0.662777	0.928872	1.39101	0.811947
	Sampling 2	Sampling 3	Sampling 4	Sampling 5	Sampling 6
BAOBAB	Gastric	Intestinal	Intestinal	Intestinal	Intestinal
	G - 120 min	I - 15 min	I - 30 min	I - 60 min	I - 120 min
	0	15	30	60	120
F1	0.148252	10.3596	11.8418	13.3333	13.0741
F3	0.26823	10.0124	12.2568	13.9838	14.0283
F9	0.116449	9.46554	10.1749	11.1206	11.3513
F12	0.109111	10.3748	11.4895	13.1125	13.9235
F18	0.203139	10.3593	11.9979	12.992	13.9382
	SD 0	SD 15	SD 30	SD 60	SD 120
F1	0.0843218	1.12585	1.21989	1.04659	0.981745
F3	0.203847	0.728348	0.682285	0.494247	1.14814
F9	0.0636563	0.405036	0.53504	0.386243	0.343191
F12	0.0702249	0.480394	1.21331	1.33011	0.953955
F18	0.0348568	0.820708	1.03267	1.25656	1.10168
