# Supplementary material for: Designing sustainable weaning foods for developing countries: not only a matter of nutrients
Source: Royal Society of Chemistry journal article supplement (doi:10.1039/d3fo02832a), 2023-01-01
Supplement: d3fo02832a3.xlsx [file d3fo02832a3.xlsx]

## Sheet: OPA before
OPA
Calibration curve
blank1A	0.3275			mean
blank1B	0.3551		blank	0.344125							MW
blank2A	0.3187										105.09
blank2B	0.3752			mean	blank correct (Y)	concentration mg/L (X)				concentration mM (X)
1.1A	1.8383		1	1.86	1.51587	150		0.15	0.00142735	1.42735
1.1B	1.9458		2	1.3618	1.01768	100		0.1	0.000951565	0.951565
1.2A	1.8219		3	1.18157	0.83745	75		0.075	0.000713674	0.713674
1.2B	1.834		4	0.884425	0.5403	50		0.05	0.000475783	0.475783
2.1A	1.3764		5	0.620125	0.276	25		0.025	0.000237891	0.237891
2.1B	1.3698		6	0.461675	0.11755	12.5		0.0125	0.000118946	0.118946
2.2A	1.3544
2.2B	1.3466
3.1A	1.3242
3.1B	1.1355
3.2A	1.1049
3.2B	1.1617
4.1A	0.9793
4.1B	0.853
4.2A	0.8539
4.2B	0.8515
5.1A	0.62
5.1B	0.6747
5.2A	0.5928
5.2B	0.593
6.1A	0.4621
6.1B	0.4755
6.2A	0.4541
6.2B	0.455
												y=1.0583x+0.0252
Different blank for each batch/day												x=(y-0.0252)/1.0583
blank3	0.1531
Sample	Abs	Blank correct			Formula	10-fold dilution		OPA before digestion (mM) 1 BLANK	mean	std			Formula	Real dilutions		OPA before digestion (mM) 1 BLANK	mean	std
1.1A	0.4353	0.2822		1.1A	0.242842	2.42842		1	2.79103	0.633634		1.1A	0.242842	21.3167		1	24.4997	5.56204
1.1B	0.3998	0.2467		1.1B	0.209298	2.09298		3	3.24648	0.332625		1.1B	0.209298	18.3722		3	28.4976	2.91979
1.2A	0.5184	0.3653		1.2A	0.321364	3.21364		4	3.25546	1.47249		1.2A	0.321364	28.2094		4	28.5764	12.9255
1.2B	0.5412	0.3881		1.2B	0.342908	3.42908		5	5.44671	0.246453		1.2B	0.342908	30.1005		5	47.8112	2.16336
3.1A	0.4861	0.333		3.1A	0.290844	2.90844		9	1.86124	0.66835		3.1A	0.290844	25.5303		9	16.338	5.86678
3.1B	0.5052	0.3521		3.1B	0.308892	3.08892		12	2.20133	1.55416		3.1B	0.308892	27.1145		12	20.9849	11.6242
3.2A	0.5679	0.4148		3.2A	0.368138	3.68138		18	3.34924	1.7283		3.2A	0.368138	32.3151		18	29.3996	15.171
3.2B	0.5283	0.3752		3.2B	0.330719	3.30719						3.2B	0.330719	29.0305
4.1A	0.6667	0.5136		4.1A	0.461495	4.61495						4.1A	0.461495	40.51
4.1B	0.6485	0.4954		4.1B	0.444297	4.44297						4.1B	0.444297	39.0004
4.2A	0.3919	0.2388		4.2A	0.201833	2.01833						4.2A	0.201833	17.7169
4.2B	0.3842	0.2311		4.2B	0.194557	1.94557						4.2B	0.194557	17.0782
5.1A	0.725	0.5719		5.1A	0.516583	5.16583						5.1A	0.516583	45.3457
5.1B	0.7519	0.5988		5.1B	0.542001	5.42001						5.1B	0.542001	47.5769
5.2A	0.7886	0.6355		5.2A	0.57668	5.7668						5.2A	0.57668	50.6209
5.2B	0.7534	0.6003		5.2B	0.543419	5.43419						5.2B	0.543419	47.7013
9.1A	0.4483	0.2952		9.1A	0.255126	2.55126						9.1A	0.255126	22.395
9.1B	0.4233	0.2702		9.1B	0.231503	2.31503						9.1B	0.231503	20.3214
9.2A	0.3194	0.1663		9.2A	0.133327	1.33327						9.2A	0.133327	11.7034
9.2B	0.3101	0.157		9.2B	0.124539	1.24539						9.2B	0.124539	10.9321
12.1A	0.4914	0.3383		12.1A	0.295852	2.95852						12.1A	0.295852	25.9699
12.1B	0.6009	0.4478		12.1B	0.39932	3.9932						12.1B	0.39932	35.0523
12.2A	0.3074	0.1543		12.2A	0.121988	1.21988						12.2A	0.121988	10.7081
12.2B	0.3255	0.1724		12.2B	0.139091	1.39091						12.2B	0.139091	12.2094
18.1A	0.6795	0.5264		18.1A	0.47359	4.7359						18.1A	0.47359	41.5717
18.1B	0.6997	0.5466		18.1B	0.492677	4.92677						18.1B	0.492677	43.2472
18.2A	0.3463	0.1932		18.2A	0.158745	1.58745						18.2A	0.158745	13.9346
18.2B	0.4055	0.2524		18.2B	0.214684	2.14684						18.2B	0.214684	18.845

## Sheet: OPA after Dil fact A
	ABS	ABS - blank	Concentration (mM)			Sample	Sampling	Dilution	ABS	ABS - blank	Concentration (mM)		Sample	Sampling	Dilution	ABS	ABS - blank	Concentration (mM)		Sample	Sampling	Dilution	ABS	ABS - blank	Concentration (mM)
Blank curve	0.1837					1.1	s1	ND	0.6164	0.4327	3.57871		3.1	s1	ND	0.5992	0.4155	3.42487		4.1	s1	ND	0.6642	0.4805	4.00626
Cal 1	1.8591	1.6754	15			1.1	s1	d 1:5	0.2622	0.0785	0.410555		3.1	s1	d 1:5	0.2602	0.0765	0.392665		4.1	s1	d 1:5	0.2719	0.0882	0.497317
Cal 2	1.3657	1.182	10			1.1	s1	d 1:10	0.2179	0.0342	0.0143113		3.1	s1	d 1:10	0.2201	0.0364	0.0339893		4.1	s1	d 1:10	0.2251	0.0414	0.078712
Cal 3	1.0798	0.8961	7.5			1.1	s2	ND	0.6733	0.4896	4.08766		3.1	s2	ND	0.6522	0.4685	3.89893		4.1	s2	ND	0.7432	0.5595	4.71288
Cal 4	0.7826	0.5989	5			1.1	s2	d 1:5	0.2782	0.0945	0.553667		3.1	s2	d 1:5	0.266	0.0823	0.444544		4.1	s2	d 1:5	0.2896	0.1059	0.655635
Cal 5	0.4914	0.3077	2.5			1.1	s2	d 1:10	0.2211	0.0374	0.0429338		3.1	s2	d 1:10	0.2157	0.032	-0.00536673		4.1	s2	d 1:10	0.2354	0.0517	0.170841
Cal 6	0.3416	0.1579	1.25			1.1	s6	ND	1.1089	0.9252	7.9839		3.1	s6	ND	1.0954	0.9117	7.86315		4.1	s6	ND	1.36	1.1763	10.2299
Cal 7	0.2607	0.077	0.5			1.1	s6	d 1:5	0.3724	0.1887	1.39624		3.1	s6	d 1:5	0.3574	0.1737	1.26208		4.1	s6	d 1:5	0.4167	0.233	1.79249
						1.1	s6	d 1:10	0.271	0.0873	0.489267		3.1	s6	d 1:10	0.2611	0.0774	0.400716		4.1	s6	d 1:10	0.2899	0.1062	0.658318
y = 0,1118x + 0,0326
x = (y-0,0326)/0,1118						Sample	Sampling	Dilution	ABS	ABS - blank	Concentration (mM)		Sample	Sampling	Dilution	ABS	ABS - blank	Concentration (mM)		Sample	Sampling	Dilution	ABS	ABS - blank	Concentration (mM)
						5.1	s1	ND	0.7975	0.6138	5.19857		9.1	s1	ND	0.5571	0.3734	3.0483		12.1	s1	ND	0.594	0.4103	3.37835
						5.1	s1	d 1:5	0.2944	0.1107	0.698569		9.1	s1	d 1:5	0.2457	0.062	0.26297		12.1	s1	d 1:5	0.2438	0.0601	0.245975
						5.1	s1	d 1:10	0.2365	0.0528	0.18068		9.1	s1	d 1:10	0.2088	0.0251	-0.0670841		12.1	s1	d 1:10	0.2103	0.0266	-0.0536673
						5.1	s2	ND	0.9197	0.736	6.29159		9.1	s2	ND	0.6164	0.4327	3.57871		12.1	s2	ND	0.6197	0.436	3.60823
						5.1	s2	d 1:5	0.317	0.1333	0.900716		9.1	s2	d 1:5	0.256	0.0723	0.355098		12.1	s2	d 1:5	0.2541	0.0704	0.338104
						5.1	s2	d 1:10	0.2429	0.0592	0.237925		9.1	s2	d 1:10	0.2175	0.0338	0.0107335		12.1	s2	d 1:10	0.2168	0.0331	0.00447227
						5.1	s6	ND	1.5432	1.3595	11.8685		9.1	s6	ND	1.0771	0.8934	7.69946		12.1	s6	ND	1.1131	0.9294	8.02147
						5.1	s6	d 1:5	0.4397	0.256	1.99821		9.1	s6	d 1:5	0.3506	0.1669	1.20125		12.1	s6	d 1:5	0.3501	0.1664	1.19678
						5.1	s6	d 1:10	0.3043	0.1206	0.78712		9.1	s6	d 1:10	0.2621	0.0784	0.40966		12.1	s6	d 1:10	0.2643	0.0806	0.429338
						Sample	Sampling	Dilution	ABS	ABS - blank	Concentration (mM)		Sample	Sampling	Dilution	ABS	ABS - blank	Concentration (mM)		Sample	Sampling	Dilution	ABS	ABS - blank	Concentration (mM)
						18.1	s1	ND	0.6283	0.4446	3.68515		Blank1	s1	ND	0.4905	0.3068	3.03578		Blank2	s1	ND	0.4874	0.3037	2.42487
						18.1	s1	d 1:5	0.2653	0.0816	0.438283		Blank1	s1	d 1:5	0.2359	0.0522	0.758497		Blank2	s1	d 1:5	0.2371	0.0534	0.186047
						18.1	s1	d 1:10	0.2188	0.0351	0.0223614		Blank1	s1	d 1:10	0.2128	0.0291	0.551878		Blank2	s1	d 1:10	0.2041	0.0204	-0.109123
						18.1	s2	ND	0.6248	0.4411	3.65385		Blank1	s2	ND	0.506	0.3223	3.17442		Blank2	s2	ND	0.4848	0.3011	2.40161
						18.1	s2	d 1:5	0.2556	0.0719	0.351521		Blank1	s2	d 1:5	0.2457	0.062	0.846154		Blank2	s2	d 1:5	0.2432	0.0595	0.240608
						18.1	s2	d 1:10	0.2155	0.0318	-0.00715564		Blank1	s2	d 1:10	0.2122	0.0285	0.546512		Blank2	s2	d 1:10	0.2237	0.04	0.0661896
						18.1	s6	ND	1.0865	0.9028	7.78354		Blank1	s6	ND	0.8811	0.6974	6.52952		Blank2	s6	ND	0.9183	0.7346	6.27907
						18.1	s6	d 1:5	0.3438	0.1601	1.14043		Blank1	s6	d 1:5	0.2973	0.1136	1.30769		Blank2	s6	d 1:5	0.3265	0.1428	0.985689
						18.1	s6	d 1:10	0.261	0.0773	0.399821		Blank1	s6	d 1:10	0.2416	0.0579	0.809481		Blank2	s6	d 1:10	0.2569	0.0732	0.363148

## Sheet: OPA after Dil fact B
	ABS	ABS - blank	Concentration (mM)			Sample	Sampling	Dilution	ABS	ABS - blank	Concentration (mM)		Sample	Sampling	Dilution	ABS	ABS - blank	Concentration (mM)		Sample	Sampling	Dilution	ABS	ABS - blank	Concentration (mM)
Blank curve	0.1878					1.2	s1	ND	0.6345	0.4467	3.68911		3.2	s1	ND	0.6172	0.4294	3.53587		4.2	s1	ND	0.703	0.5152	4.29584
Cal 1	1.8849	1.6971	15			1.2	s1	d 1:5	0.2681	0.0803	0.443756		3.2	s1	d 1:5	0.2655	0.0777	0.420726		4.2	s1	d 1:5	0.2801	0.0923	0.550044
Cal 2	1.3729	1.1851	10			1.2	s1	d 1:10	0.2258	0.038	0.0690877		3.2	s1	d 1:10	0.2261	0.0383	0.0717449		4.2	s1	d 1:10	0.2281	0.0403	0.0894597
Cal 3	1.072	0.8842	7.5			1.2	s2	ND	0.6964	0.5086	4.23738		3.2	s2	ND	0.6858	0.498	4.14349		4.2	s2	ND	0.854	0.6662	5.6333
Cal 4	0.8047	0.6169	5			1.2	s2	d 1:5	0.2876	0.0998	0.616475		3.2	s2	d 1:5	0.2756	0.0878	0.510186		4.2	s2	d 1:5	0.3088	0.121	0.804252
Cal 5	0.5044	0.3166	2.5			1.2	s2	d 1:10	0.2182	0.0304	0.00177148		3.2	s2	d 1:10	0.2262	0.0384	0.0726306		4.2	s2	d 1:10	0.251	0.0632	0.292294
Cal 6	0.3378	0.15	1.25			1.2	s6	ND	1.1455	0.9577	8.21523		3.2	s6	ND	1.0992	0.9114	7.80514		4.2	s6	ND	1.5756	1.3878	12.0248
Cal 7	0.2632	0.0754	0.5			1.2	s6	d 1:5	0.371	0.1832	1.35518		3.2	s6	d 1:5	0.3594	0.1716	1.25244		4.2	s6	d 1:5	0.464	0.2762	2.17892
						1.2	s6	d 1:10	0.2774	0.0896	0.526129		3.2	s6	d 1:10	0.2725	0.0847	0.482728		4.2	s6	d 1:10	0.3063	0.1185	0.782108
y = 0,1129x + 0,0302						Sample	Sampling	Dilution	ABS	ABS - blank	Concentration (mM)		Sample	Sampling	Dilution	ABS	ABS - blank	Concentration (mM)		Sample	Sampling	Dilution	ABS	ABS - blank	Concentration (mM)
x = (y-0,0302)/0,1129						5.2	s1	ND	0.8094	0.6216	5.23826		9.2	s1	ND	0.6121	0.4243	3.4907		12.2	s1	ND	0.6576	0.4698	3.89371
						5.2	s1	d 1:5	0.3005	0.1127	0.730735		9.2	s1	d 1:5	0.2517	0.0639	0.298494		12.2	s1	d 1:5	0.2657	0.0779	0.422498
						5.2	s1	d 1:10	0.2445	0.0567	0.234721		9.2	s1	d 1:10	0.2178	0.03	-0.00177148		12.2	s1	d 1:10	0.2193	0.0315	0.0115146
						5.2	s2	ND	1.0503	0.8625	7.37201		9.2	s2	ND	0.6328	0.445	3.67405		12.2	s2	ND	0.6661	0.4783	3.969
						5.2	s2	d 1:5	0.3234	0.1356	0.93357		9.2	s2	d 1:5	0.2653	0.0775	0.418955		12.2	s2	d 1:5	0.2713	0.0835	0.472099
						5.2	s2	d 1:10	0.2494	0.0616	0.278122		9.2	s2	d 1:10	0.2165	0.0287	-0.0132861		12.2	s2	d 1:10	0.228	0.0402	0.088574
						5.2	s6	ND	1.6028	1.415	12.2657		9.2	s6	ND	1.1115	0.9237	7.91408		12.2	s6	ND	1.1281	0.9403	8.06112
						5.2	s6	d 1:5	0.4765	0.2887	2.28964		9.2	s6	d 1:5	0.3637	0.1759	1.29052		12.2	s6	d 1:5	0.3584	0.1706	1.24358
						5.2	s6	d 1:10	0.332	0.1442	1.00974		9.2	s6	d 1:10	0.279	0.0912	0.540301		12.2	s6	d 1:10	0.2644	0.0766	0.410983
						Sample	Sampling	Dilution	ABS	ABS - blank	Concentration (mM)		Sample	Sampling	Dilution	ABS	ABS - blank	Concentration (mM)
						18.2	s1	ND	0.6188	0.431	3.55004		Blank3	s1	ND	0.513	0.3252	2.61293
						18.2	s1	d 1:5	0.2721	0.0843	0.479185		Blank3	s1	d 1:5	0.242	0.0542	0.212578
						18.2	s1	d 1:10	0.2254	0.0376	0.0655447		Blank3	s1	d 1:10	0.2183	0.0305	0.00265722
						18.2	s2	ND	0.5474	0.3596	2.91763		Blank3	s2	ND	0.5389	0.3511	2.84234
						18.2	s2	d 1:5	0.2439	0.0561	0.229407		Blank3	s2	d 1:5	0.2496	0.0618	0.279894
						18.2	s2	d 1:10	0.2069	0.0191	-0.0983171		Blank3	s2	d 1:10	0.215	0.0272	-0.0265722
						18.2	s6	ND	1.1805	0.9927	8.52524		Blank3	s6	ND	0.9369	0.7491	6.36758
						18.2	s6	d 1:5	0.3685	0.1807	1.33304		Blank3	s6	d 1:5	0.321	0.1332	0.912312
						18.2	s6	d 1:10	0.2711	0.0833	0.470328		Blank3	s6	d 1:10	0.2398	0.052	0.193091

## Sheet: S1 - S2 rd
	ABS	ABS - blank	Concentration (mM)						Order	Sample	Batch	Duplicate	Sampling	ABS	ABS - blank	mM free aa []			Order	Sample	Batch	Duplicate	Sampling	ABS	ABS - blank	mM free aa []
Blank curve	0.1703								1	F1.1	1	A	s1	0.6015	0.4312	2.87481			1	F1.1	1	A	s2	0.6726	0.5023	3.42427
Cal 1	2.119	1.9487	15						2	F1.1	1	B	s1	0.5984	0.4281	2.85085			2	F1.1	1	B	s2	0.6778	0.5075	3.46445
Cal 2	1.5472	1.3769	10						3	F1.2	2	A	s1	0.5957	0.4254	2.82998			3	F1.2	2	A	s2	0.6741	0.5038	3.43586
Cal 3	1.245	1.0747	7.5						4	F1.2	2	B	s1	0.5914	0.4211	2.79675			4	F1.2	2	B	s2	0.7341	0.5638	3.89954
Cal 4	0.9297	0.7594	5						5	F3.1	1	A	s1	0.6081	0.4378	2.92581			5	F3.1	1	A	s2	0.6424	0.4721	3.19088
Cal 5	0.5501	0.3798	2.5						6	F3.1	1	B	s1	0.5981	0.4278	2.84853			6	F3.1	1	B	s2	0.6517	0.4814	3.26275
Cal 6	0.3614	0.1911	1.25						7	F3.2	2	A	s1	0.6008	0.4305	2.8694			7	F3.2	2	A	s2	0.6669	0.4966	3.38022
Cal 7	0.2569	0.0866	0.5						8	F3.2	2	B	s1	0.6104	0.4401	2.94359			8	F3.2	2	B	s2	0.6797	0.5094	3.47913
									9	F4.1	1	A	s1	0.6829	0.5126	3.50386			9	F4.1	1	A	s2	0.7841	0.6138	4.28594
									10	F4.1	1	B	s1	0.6628	0.4925	3.34853			10	F4.1	1	B	s2	0.7899	0.6196	4.33076
									11	F4.2	2	A	s1	0.6731	0.5028	3.42813			11	F4.2	2	A	s2	0.7995	0.6292	4.40495
									12	F4.2	2	B	s1	0.6588	0.4885	3.31762			12	F4.2	2	B	s2	0.7982	0.6279	4.3949
									13	F5.1	1	A	s1	0.8161	0.6458	4.53323			13	F5.1	1	A	s2	0.934	0.7637	5.44436
		0.0592							14	F5.1	1	B	s1	0.82	0.6497	4.56337			14	F5.1	1	B	s2	0.9354	0.7651	5.45518
		0.1294							15	F5.2	2	A	s1	0.8091	0.6388	4.47913			15	F5.2	2	A	s2	0.9431	0.7728	5.51468
									16	F5.2	2	B	s1	0.8421	0.6718	4.73416			16	F5.2	2	B	s2	0.9851	0.8148	5.83926
									17	F9.1	1	A	s1	0.592	0.4217	2.80139			17	F9.1	1	A	s2	0.6326	0.4623	3.11515
									18	F9.1	1	B	s1	0.598	0.4277	2.84776			18	F9.1	1	B	s2	0.6343	0.464	3.12828
									19	F9.2	2	A	s1	0.5762	0.4059	2.67929			19	F9.2	2	A	s2	0.6078	0.4375	2.92349
									20	F9.2	2	B	s1	0.5787	0.4084	2.69861			20	F9.2	2	B	s2	0.6338	0.4635	3.12442
									21	F12.1	1	A	s1	0.6301	0.4598	3.09583			21	F12.1	1	A	s2	0.6662	0.4959	3.37481
									22	F12.1	1	B	s1	0.6334	0.4631	3.12133			22	F12.1	1	B	s2	0.6521	0.4818	3.26584
									23	F12.2	2	A	s1	0.6101	0.4398	2.94127			23	F12.2	2	A	s2	0.664	0.4937	3.35781
									24	F12.2	2	B	s1	0.6148	0.4445	2.97759			24	F12.2	2	B	s2	0.5945	0.4242	2.82071
									25	F18.1	1	A	s1	0.6406	0.4703	3.17697			25	F18.1	1	A	s2	0.6433	0.473	3.19784
									26	F18.1	1	B	s1	0.6304	0.4601	3.09815			26	F18.1	1	B	s2	0.6495	0.4792	3.24575
									27	F18.2	2	A	s1	0.6139	0.4436	2.97063			27	F18.2	2	A	s2	0.5269	0.3566	2.2983
									28	F18.2	2	B	s1	0.6104	0.4401	2.94359			28	F18.2	2	B	s2	0.6652	0.4949	3.36708
									29	Blank1		A	s1	0.4862	0.3159	1.98377			29	Blank1		A	s2	0.5142	0.3439	2.20015
									30	Blank1		B	s1	0.5012	0.3309	2.09969			30	Blank1		B	s2	0.5202	0.3499	2.24652
									31	Blank2		A	s1	0.4936	0.3233	2.04096			31	Blank2		A	s2	0.5333	0.363	2.34776
									32	Blank2		B	s1	0.4844	0.3141	1.96986			32	Blank2		B	s2	0.5206	0.3503	2.24961
									33	Blank3		A	s1	0.5129	0.3426	2.19011			33	Blank3		A	s2	0.526	0.3557	2.29134
									34	Blank3		B	s1	0.5177	0.3474	2.2272			34	Blank3		B	s2	0.5387	0.3684	2.38949

## Sheet: S3 - S4 rd
	ABS	ABS - blank	Concentration (mM)		Order	Sample	Batch	Duplicate	Sampling	ABS	ABS - blank	mM free aa []		Order	Sample	Batch	Duplicate	Sampling	ABS	ABS - blank	mM free aa []
Blank curve	0.1734				1	F1.1	1	A	s3	0.9917	0.8183	5.90664		1	F1.1	1	A	s4	0.8774	0.704	5.02469
Cal 1	2.1045	1.9311	15		2	F1.1	1	B	s3	0.9673	0.7939	5.71836		2	F1.1	1	B	s4	0.8966	0.7232	5.17284
Cal 2	1.5752	1.4018	10		3	F1.2	2	A	s3	0.9488	0.7754	5.57562		3	F1.2	2	A	s4	1.0132	0.8398	6.07253
Cal 3	1.2469	1.0735	7.5		4	F1.2	2	B	s3	0.9619	0.7885	5.6767		4	F1.2	2	B	s4	1.005	0.8316	6.00926
Cal 4	0.9028	0.7294	5		5	F3.1	1	A	s3	0.9517	0.7783	5.59799		5	F3.1	1	A	s4	0.8966	0.7232	5.17284
Cal 5	0.551	0.3776	2.5		6	F3.1	1	B	s3	0.914	0.7406	5.3071		6	F3.1	1	B	s4	0.839	0.6656	4.7284
Cal 6	0.3589	0.1855	1.25		7	F3.2	2	A	s3	0.9183	0.7449	5.34028		7	F3.2	2	A	s4	0.9654	0.792	5.7037
Cal 7	0.255	0.0816	0.5		8	F3.2	2	B	s3	0.9295	0.7561	5.4267		8	F3.2	2	B	s4	0.9813	0.8079	5.82639
					9	F4.1	1	A	s3	1.095	0.9216	6.7037		9	F4.1	1	A	s4	1.0724	0.899	6.52932
					10	F4.1	1	B	s3	1.1354	0.962	7.01543		10	F4.1	1	B	s4	0.9855	0.8121	5.8588
					11	F4.2	2	A	s3	1.1939	1.0205	7.46682		11	F4.2	2	A	s4	1.313	1.1396	8.3858
					12	F4.2	2	B	s3	1.1543	0.9809	7.16127		12	F4.2	2	B	s4	1.2625	1.0891	7.99614
		0.0528			13	F5.1	1	A	s3	1.1899	1.0165	7.43596		13	F5.1	1	A	s4	1.0218	0.8484	6.13889
		0.1296			14	F5.1	1	B	s3	1.2513	1.0779	7.90972		14	F5.1	1	B	s4	1.1396	0.9662	7.04784
					15	F5.2	2	A	s3	1.234	1.0606	7.77623		15	F5.2	2	A	s4	1.2783	1.1049	8.11806
					16	F5.2	2	B	s3	1.2315	1.0581	7.75694		16	F5.2	2	B	s4	1.2866	1.1132	8.1821
					17	F9.1	1	A	s3	0.9614	0.788	5.67284		17	F9.1	1	A	s4	0.8827	0.7093	5.06559
					18	F9.1	1	B	s3	0.9912	0.8178	5.90278		18	F9.1	1	B	s4	0.8815	0.7081	5.05633
					19	F9.2	2	A	s3	0.9382	0.7648	5.49383		19	F9.2	2	A	s4	0.9775	0.8041	5.79707
					20	F9.2	2	B	s3	0.9346	0.7612	5.46605		20	F9.2	2	B	s4	0.9737	0.8003	5.76775
					21	F12.1	1	A	s3	0.9928	0.8194	5.91512		21	F12.1	1	A	s4	0.9187	0.7453	5.34336
					22	F12.1	1	B	s3	0.9835	0.8101	5.84336		22	F12.1	1	B	s4	1.0327	0.8593	6.22299
					23	F12.2	2	A	s3	0.9725	0.7991	5.75849		23	F12.2	2	A	s4	0.9907	0.8173	5.89892
					24	F12.2	2	B	s3	0.9741	0.8007	5.77083		24	F12.2	2	B	s4	1.0334	0.86	6.2284
					25	F18.1	1	A	s3	0.9528	0.7794	5.60648		25	F18.1	1	A	s4	0.9833	0.8099	5.84182
					26	F18.1	1	B	s3	0.9582	0.7848	5.64815		26	F18.1	1	B	s4	0.9861	0.8127	5.86343
					27	F18.2	2	A	s3	0.972	0.7986	5.75463		27	F18.2	2	A	s4	0.9982	0.8248	5.95679
					28	F18.2	2	B	s3	0.9742	0.8008	5.7716		28	F18.2	2	B	s4	1.0102	0.8368	6.04938
					29	Blank1		A	s3	0.8028	0.6294	4.44907		29	Blank1		A	s4	0.7597	0.5863	4.11651
					30	Blank1		B	s3	0.8146	0.6412	4.54012		30	Blank1		B	s4	0.7446	0.5712	4
					31	Blank2		A	s3	0.8332	0.6598	4.68364		31	Blank2		A	s4	0.8533	0.6799	4.83873
					32	Blank2		B	s3	0.7998	0.6264	4.42593		32	Blank2		B	s4	0.8059	0.6325	4.47299
					33	Blank3		A	s3	0.8102	0.6368	4.50617		33	Blank3		A	s4	0.8269	0.6535	4.63503
					34	Blank3		B	s3	0.8189	0.6455	4.5733		34	Blank3		B	s4	0.8263	0.6529	4.6304

## Sheet: S5 - S6 rd
	ABS	ABS - blank	Concentration (mM)		Order	Sample	Batch	Duplicate	Sampling	ABS	ABS - blank	mM free aa []		Order	Sample	Batch	Duplicate	Sampling	ABS	ABS - blank	mM free aa []
Blank curve	0.1789				1	F1.1	1	A	s5	0.9921	0.8132	5.96223		1	F1.1	1	A	s6	1.1534	0.9745	7.23131
Cal 1	2.0581	1.8792	15		2	F1.1	1	B	s5	0.8819	0.703	5.0952		2	F1.1	1	B	s6	1.1124	0.9335	6.90873
Cal 2	1.567	1.3881	10		3	F1.2	2	A	s5	1.0382	0.8593	6.32494		3	F1.2	2	A	s6	1.1049	0.926	6.84972
Cal 3	1.2621	1.0832	7.5		4	F1.2	2	B	s5	1.025	0.8461	6.22109		4	F1.2	2	B	s6	1.135	0.9561	7.08655
Cal 4	0.8969	0.718	5		5	F3.1	1	A	s5	0.9924	0.8135	5.96459		5	F3.1	1	A	s6	1.1099	0.931	6.88906
Cal 5	0.5399	0.361	2.5		6	F3.1	1	B	s5	1.0122	0.8333	6.12038		6	F3.1	1	B	s6	1.0923	0.9134	6.75059
Cal 6	0.3589	0.18	1.25		7	F3.2	2	A	s5	1.0137	0.8348	6.13218		7	F3.2	2	A	s6	1.0741	0.8952	6.6074
Cal 7	0.2616	0.0827	0.5		8	F3.2	2	B	s5	1.0028	0.8239	6.04642		8	F3.2	2	B	s6	1.1027	0.9238	6.83242
					9	F4.1	1	A	s5	1.1189	0.94	6.95987		9	F4.1	1	A	s6	1.371	1.1921	8.94335
					10	F4.1	1	B	s5	1.2017	1.0228	7.61133		10	F4.1	1	B	s6	1.3652	1.1863	8.89772
		0.0554			11	F4.2	2	A	s5	1.4375	1.2586	9.46656		11	F4.2	2	A	s6	1.5244	1.3455	10.1503
		0.1271			12	F4.2	2	B	s5	1.3803	1.2014	9.01652		12	F4.2	2	B	s6	1.5147	1.3358	10.074
					13	F5.1	1	A	s5	1.2395	1.0606	7.90873		13	F5.1	1	A	s6	1.4853	1.3064	9.84264
					14	F5.1	1	B	s5	1.1414	0.9625	7.1369		14	F5.1	1	B	s6	1.5706	1.3917	10.5138
					15	F5.2	2	A	s5	1.4562	1.2773	9.61369		15	F5.2	2	A	s6	1.5099	1.331	10.0362
					16	F5.2	2	B	s5	1.4739	1.295	9.75295		16	F5.2	2	B	s6	1.5318	1.3529	10.2085
					17	F9.1	1	A	s5	0.9216	0.7427	5.40755		17	F9.1	1	A	s6	1.0945	0.9156	6.7679
					18	F9.1	1	B	s5	0.9213	0.7424	5.40519		18	F9.1	1	B	s6	1.1362	0.9573	7.09599
					19	F9.2	2	A	s5	1.0299	0.851	6.25964		19	F9.2	2	A	s6	1.1072	0.9283	6.86782
					20	F9.2	2	B	s5	1.034	0.8551	6.2919		20	F9.2	2	B	s6	1.0796	0.9007	6.65067
					21	F12.1	1	A	s5	1.0425	0.8636	6.35877		21	F12.1	1	A	s6	1.1153	0.9364	6.93155
					22	F12.1	1	B	s5	1.0826	0.9037	6.67427		22	F12.1	1	B	s6	1.1338	0.9549	7.0771
					23	F12.2	2	A	s5	1.0587	0.8798	6.48623		23	F12.2	2	A	s6	1.1327	0.9538	7.06845
					24	F12.2	2	B	s5	1.0607	0.8818	6.50197		24	F12.2	2	B	s6	1.1544	0.9755	7.23918
					25	F18.1	1	A	s5	1.0735	0.8946	6.60268		25	F18.1	1	A	s6	1.0743	0.8954	6.60897
					26	F18.1	1	B	s5	1.0734	0.8945	6.60189		26	F18.1	1	B	s6	1.1294	0.9505	7.04249
					27	F18.2	2	A	s5	1.0472	0.8683	6.39575		27	F18.2	2	A	s6	1.1416	0.9627	7.13847
					28	F18.2	2	B	s5	1.0721	0.8932	6.59166		28	F18.2	2	B	s6	1.1601	0.9812	7.28403
					29	Blank1		A	s5	0.7362	0.5573	3.94886		29	Blank1		A	s6	0.9019	0.723	5.25256
					30	Blank1		B	s5	0.7698	0.5909	4.21322		30	Blank1		B	s6	0.9037	0.7248	5.26672
					31	Blank2		A	s5	0.8912	0.7123	5.16837		31	Blank2		A	s6	0.9092	0.7303	5.30999
					32	Blank2		B	s5	0.8636	0.6847	4.95122		32	Blank2		B	s6	0.8639	0.685	4.95358
					33	Blank3		A	s5	0.8418	0.6629	4.7797		33	Blank3		A	s6	0.9026	0.7237	5.25806
					34	Blank3		B	s5	0.8525	0.6736	4.86389		34	Blank3		B	s6	0.9139	0.735	5.34697

## Sheet: S1
													mM (1 BLANK)
Sample	Order	Initial weight	Batch	Duplicate	Sampling	ABS S1	ABS - blank	mM free aa []	Dil digestion OPA	Dil digestion digestion	No enzymes (mg/L)	Divided sample weight	Free NH2 in mM	Digestibility %
F1.1	1	5.09	1	A	s1	0.6015	0.4312	3.3323	9.03054	36.1222	8.55863	1.68146	0.0686319	6.86319		OPA before digestion (mM) 1 BLANK	mean	std			anova
F1.1	2	5.06	1	B	s1	0.5984	0.4281	3.30835	8.96562	35.8625	8.29894	1.64011	0.066944	6.6944		1	24.4997	5.56204		S1	Digestibility %
F1.2	3	5.03	2	A	s1	0.5957	0.4254	3.28748	8.90907	35.6363	8.07276	1.60492	0.0655078	6.55078		3	28.4976	2.91979		F1	6.86319
F1.2	4	5.03	2	B	s1	0.5914	0.4211	3.25425	8.81902	35.2761	7.71254	1.53331	0.0625848	6.25848		4	28.5764	12.9255		F1	6.6944
F3.1	5	5.04	1	A	s1	0.6081	0.4378	3.38331	9.16876	36.6751	9.11152	1.80784	0.0634384	6.34384		5	47.8112	2.16336		F1	6.55078
F3.1	6	5.03	1	B	s1	0.5981	0.4278	3.30603	8.95934	35.8373	8.27381	1.64489	0.0577204	5.77204		9	16.338	5.86678		F1	6.25848
F3.2	7	5.06	2	A	s1	0.6008	0.4305	3.32689	9.01588	36.0635	8.49999	1.67984	0.0589467	5.89467		12	20.9849	11.6242		F3	6.34384
F3.2	8	5.05	2	B	s1	0.6104	0.4401	3.40108	9.21693	36.8677	9.30419	1.84241	0.0646516	6.46516		18	29.3996	15.171		F3	5.77204
F4.1	9	5.05	1	A	s1	0.6829	0.5126	3.96136	10.7353	42.9411	15.3776	3.04507	0.106559	10.6559						F3	5.89467
F4.1	10	5.04	1	B	s1	0.6628	0.4925	3.80603	10.3143	41.2573	13.6938	2.71703	0.0950793	9.50793						F3	6.46516
F4.2	11	5.06	2	A	s1	0.6731	0.5028	3.88563	10.53	42.1202	14.5567	2.87681	0.100671	10.0671		Sampling 1	Mean	SD		F4	10.6559
F4.2	12	5.03	2	B	s1	0.6588	0.4885	3.77512	10.2306	40.9223	13.3587	2.65581	0.0929372	9.29372		F1	6.59171	0.25623		F4	9.50793
F5.1	13	5.04	1	A	s1	0.8161	0.6458	4.99073	13.5249	54.0995	26.5359	5.26507	0.110122	11.0122		F3	6.11892	0.337186		F4	10.0671
F5.1	14	5.08	1	B	s1	0.82	0.6497	5.02087	13.6065	54.4262	26.8626	5.28792	0.1106	11.06		F4	9.88116	0.610783		F4	9.29372
F5.2	15	5.06	2	A	s1	0.8091	0.6388	4.93663	13.3783	53.5131	25.9495	5.12837	0.107263	10.7263		F5	11.1727	0.501939		F5	11.0122
F5.2	16	5.05	2	B	s1	0.8421	0.6718	5.19165	14.0694	56.2775	28.714	5.68594	0.118925	11.8925		F9	8.81698	1.09825		F5	11.06
F9.1	17	5.03	1	A	s1	0.592	0.4217	3.25889	8.83158	35.3263	7.7628	1.5433	0.094461	9.4461		F12	9.7141	0.897907		F5	10.7263
F9.1	18	5.04	1	B	s1	0.598	0.4277	3.30526	8.95724	35.829	8.26543	1.63997	0.100378	10.0378		F18	7.01899	0.818213		F5	11.8925
F9.2	19	5.06	2	A	s1	0.5762	0.4059	3.13679	8.50069	34.0028	6.43922	1.27257	0.0778905	7.78905						F9	9.4461
F9.2	20	5.09	2	B	s1	0.5787	0.4084	3.15611	8.55304	34.2122	6.64865	1.30622	0.0799498	7.99498						F9	10.0378
F12.1	21	5.02	1	A	s1	0.6301	0.4598	3.55332	9.62951	38.518	10.9545	2.18217	0.103987	10.3987						F9	7.78905
F12.1	22	5.07	1	B	s1	0.6334	0.4631	3.57883	9.69862	38.7945	11.2309	2.21517	0.10556	10.556						F9	7.99498
F12.2	23	5.05	2	A	s1	0.6101	0.4398	3.39876	9.21065	36.8426	9.27906	1.83744	0.0875599	8.75599						F12	10.3987
F12.2	24	5.04	2	B	s1	0.6148	0.4445	3.43509	9.30908	37.2363	9.67279	1.9192	0.0914563	9.14563						F12	10.556
F18.1	25	5.04	1	A	s1	0.6406	0.4703	3.63447	9.8494	39.3976	11.8341	2.34803	0.0798661	7.98661						F12	8.75599
F18.1	26	5.05	1	B	s1	0.6304	0.4601	3.55564	9.63579	38.5432	10.9796	2.17418	0.0739527	7.39527						F12	9.14563
F18.2	27	5.05	2	A	s1	0.6139	0.4436	3.42813	9.29023	37.1609	9.59739	1.90047	0.0646428	6.46428						F18	7.98661
F18.2	28	5.08	2	B	s1	0.6104	0.4401	3.40108	9.21693	36.8677	9.30419	1.83153	0.0622979	6.22979						F18	7.39527
Blank1	29			A	s1	0.4862	0.3159	2.44127	6.61583	26.4633										F18	6.46428
Blank1	30			B	s1	0.5012	0.3309	2.55719	6.92998	27.7199										F18	6.22979
Blank2	31			A	s1	0.4936	0.3233	2.49845	6.77081	27.0832
Blank2	32			B	s1	0.4844	0.3141	2.42736	6.57814	26.3126		y = 0,1294x + 0,0592
Blank3	33			A	s1	0.5129	0.3426	2.6476	7.17501	28.7
Blank3	34			B	s1	0.5177	0.3474	2.6847	7.27553	29.1021		0.0592
												0.1294
								Blank mean	Blank SD
								27.5635	0.289168

## Sheet: S2
													mM (1 BLANK)
Sample	Order	Initial weight	Batch	Duplicate	Sampling	ABS S2	ABS - blank	mM free aa []	Dil digestion OPA	Dil digestion digestion	No enzymes (mg/L)	Divided sample weight	Free NH2 in mM	Digestibility %
F1.1	1	5.09	1	A	s2	0.6726	0.5023	3.88176	10.5196	42.0783	12.3228	2.42097	0.0988165	9.88165		OPA before digestion (mM) 1 BLANK	mean	std			anova
F1.1	2	5.06	1	B	s2	0.6778	0.5075	3.92195	10.6285	42.5139	12.7584	2.52142	0.102916	10.2916		1	24.4997	5.56204		S2	Digestibility %
F1.2	3	5.03	2	A	s2	0.6741	0.5038	3.89335	10.551	42.204	12.4484	2.47483	0.101015	10.1015		3	28.4976	2.91979		F1	9.88165
F1.2	4	5.03	2	B	s2	0.7341	0.5638	4.35703	11.8076	47.2302	17.4747	3.47409	0.141801	14.1801		4	28.5764	12.9255		F1	10.2916
F3.1	5	5.04	1	A	s2	0.6424	0.4721	3.64838	9.8871	39.5484	9.79286	1.94303	0.0681821	6.81821		5	47.8112	2.16336		F1	10.1015
F3.1	6	5.03	1	B	s2	0.6517	0.4814	3.72025	10.0819	40.3275	10.5719	2.10178	0.0737527	7.37527		9	16.338	5.86678		F1	14.1801
F3.2	7	5.06	2	A	s2	0.6669	0.4966	3.83771	10.4002	41.6008	11.8453	2.34096	0.0821458	8.21458		12	20.9849	11.6242		F3	6.81821
F3.2	8	5.05	2	B	s2	0.6797	0.5094	3.93663	10.6683	42.6731	12.9175	2.55793	0.0897593	8.97593		18	29.3996	15.171		F3	7.37527
F4.1	9	5.05	1	A	s2	0.7841	0.6138	4.74343	12.8547	51.4188	21.6632	4.28975	0.150115	15.0115						F3	8.21458
F4.1	10	5.04	1	B	s2	0.7899	0.6196	4.78825	12.9762	51.9047	22.1491	4.39467	0.153787	15.3787						F3	8.97593
F4.2	11	5.06	2	A	s2	0.7995	0.6292	4.86244	13.1772	52.7089	22.9533	4.53623	0.15874	15.874		Sampling 2	Mean	SD		F4	15.0115
F4.2	12	5.03	2	B	s2	0.7982	0.6279	4.8524	13.15	52.6	22.8444	4.54163	0.15893	15.893		F1	11.1137	2.05113		F4	15.3787
F5.1	13	5.04	1	A	s2	0.934	0.7637	5.90185	15.994	63.9761	34.2206	6.78979	0.142013	14.2013		F3	7.846	0.947019		F4	15.874
F5.1	14	5.08	1	B	s2	0.9354	0.7651	5.91267	16.0233	64.0934	34.3378	6.75942	0.141377	14.1377		F4	15.5393	0.424846		F4	15.893
F5.2	15	5.06	2	A	s2	0.9431	0.7728	5.97218	16.1846	64.7384	34.9829	6.91361	0.144602	14.4602		F5	14.6863	0.851343		F5	14.2013
F5.2	16	5.05	2	B	s2	0.9851	0.8148	6.29675	17.0642	68.2568	38.5013	7.62401	0.159461	15.9461		F9	10.3088	1.31483		F5	14.1377
F9.1	17	5.03	1	A	s2	0.6326	0.4623	3.57264	9.68186	38.7274	8.9719	1.78368	0.109174	10.9174		F12	10.7017	0.646555		F5	14.4602
F9.1	18	5.04	1	B	s2	0.6343	0.464	3.58578	9.71747	38.8699	9.11431	1.8084	0.110687	11.0687		F18	7.1641	0.605612		F5	15.9461
F9.2	19	5.06	2	A	s2	0.6078	0.4375	3.38099	9.16248	36.6499	6.89437	1.36252	0.0833962	8.33962						F9	10.9174
F9.2	20	5.09	2	B	s2	0.6338	0.4635	3.58192	9.70699	38.828	9.07243	1.7824	0.109096	10.9096						F9	11.0687
F12.1	21	5.02	1	A	s2	0.6662	0.4959	3.8323	10.3855	41.5422	11.7866	2.34793	0.111887	11.1887						F9	8.33962
F12.1	22	5.07	1	B	s2	0.6521	0.4818	3.72334	10.0902	40.361	10.6054	2.0918	0.0996812	9.96812						F9	10.9096
F12.2	23	5.05	2	A	s2	0.664	0.4937	3.8153	10.3395	41.3579	11.6023	2.29749	0.109483	10.9483						F12	11.1887
F12.2	24	5.04	2	B	s2	0.5945	0.4242	3.27821	8.88394	35.5358	5.78022	1.14687	0.054652	5.4652						F12	9.96812
F18.1	25	5.04	1	A	s2	0.6433	0.473	3.65533	9.90595	39.6238	9.86825	1.95799	0.066599	6.6599						F12	10.9483
F18.1	26	5.05	1	B	s2	0.6495	0.4792	3.70325	10.0358	40.1432	10.3876	2.05696	0.0699654	6.99654						F18	6.6599
F18.2	27	5.05	2	A	s2	0.5269	0.3566	2.7558	7.46821	29.8728	0.11728	0.0232237	0.000789932	0.0789932						F18	6.99654
F18.2	28	5.08	2	B	s2	0.6652	0.4949	3.82457	10.3646	41.4584	11.7028	2.30371	0.0783585	7.83585						F18	7.83585
Blank1	29			A	s2	0.5142	0.3439	2.65765	7.20223	28.8089
Blank1	30			B	s2	0.5202	0.3499	2.70402	7.32789	29.3116
Blank2	31			A	s2	0.5333	0.363	2.80526	7.60224	30.409
Blank2	32			B	s2	0.5206	0.3503	2.70711	7.33627	29.3451		y = 0,1294x + 0,0592
Blank3	33			A	s2	0.526	0.3557	2.74884	7.44936	29.7974
Blank3	34			B	s2	0.5387	0.3684	2.84699	7.71533	30.8613		0.0592
												0.1294
								Blank mean	Blank SD
								29.7555	0.190826

## Sheet: S3
													mM (1 BLANK)
Sample	Order	Initial weight	Batch	Duplicate	Sampling	ABS S3	ABS - blank	mM free aa []	Dil digestion OPA	Dil digestion digestion	No enzymes (mg/L)	Divided sample weight	Free NH2 in mM	Digestibility %
F1.1	1	5.09	1	A	s3	0.9917	0.8183	6.31404	17.1111	136.888	29.8518	5.8648	0.239383	23.9383		OPA before digestion (mM) 1 BLANK	mean	std			anova
F1.1	2	5.06	1	B	s3	0.9673	0.7939	6.12577	16.6008	132.807	25.7701	5.0929	0.207876	20.7876		1	24.4997	5.56204		S3	Digestibility %
F1.2	3	5.03	2	A	s3	0.9488	0.7754	5.98302	16.214	129.712	22.6753	4.50802	0.184003	18.4003		3	28.4976	2.91979		F1	23.9383
F1.2	4	5.03	2	B	s3	0.9619	0.7885	6.0841	16.4879	131.903	24.8668	4.94369	0.201786	20.1786		4	28.5764	12.9255		F1	20.7876
F3.1	5	5.04	1	A	s3	0.9517	0.7783	6.0054	16.2746	130.197	23.1605	4.59533	0.161253	16.1253		5	47.8112	2.16336		F1	18.4003
F3.1	6	5.03	1	B	s3	0.914	0.7406	5.71451	15.4863	123.89	16.8539	3.35067	0.117577	11.7577		9	16.338	5.86678		F1	20.1786
F3.2	7	5.06	2	A	s3	0.9183	0.7449	5.74769	15.5762	124.61	17.5732	3.47296	0.121869	12.1869		12	20.9849	11.6242		F3	16.1253
F3.2	8	5.05	2	B	s3	0.9295	0.7561	5.8341	15.8104	126.483	19.4468	3.85084	0.135129	13.5129		18	29.3996	15.171		F3	11.7577
F4.1	9	5.05	1	A	s3	1.095	0.9216	7.11111	19.2711	154.169	47.1323	9.33312	0.326602	32.6602						F3	12.1869
F4.1	10	5.04	1	B	s3	1.1354	0.962	7.42284	20.1159	160.927	53.8905	10.6926	0.374175	37.4175						F3	13.5129
F4.2	11	5.06	2	A	s3	1.1939	1.0205	7.87423	21.3392	170.713	63.6766	12.5843	0.440374	44.0374		Sampling 3	Mean	SD		F4	32.6602
F4.2	12	5.03	2	B	s3	1.1543	0.9809	7.56867	20.5111	164.089	57.0522	11.3424	0.396914	39.6914		F1	20.8262	2.30873		F4	37.4175
F5.1	13	5.04	1	A	s3	1.1899	1.0165	7.84336	21.2555	170.044	63.0075	12.5015	0.261476	26.1476		F3	13.3957	1.96714		F4	44.0374
F5.1	14	5.08	1	B	s3	1.2513	1.0779	8.31713	22.5394	180.315	73.2787	14.4249	0.301706	30.1706		F4	38.4516	4.73808		F4	39.6914
F5.2	15	5.06	2	A	s3	1.234	1.0606	8.18364	22.1777	177.421	70.3847	13.91	0.290937	29.0937		F5	28.5975	1.71927		F5	26.1476
F5.2	16	5.05	2	B	s3	1.2315	1.0581	8.16435	22.1254	177.003	69.9665	13.8548	0.289781	28.9781		F9	29.0007	5.39607		F5	30.1706
F9.1	17	5.03	1	A	s3	0.9614	0.788	6.08025	16.4775	131.82	24.7831	4.92706	0.301571	30.1571		F12	26.465	1.53743		F5	29.0937
F9.1	18	5.04	1	B	s3	0.9912	0.8178	6.31019	17.1006	136.805	29.7682	5.90638	0.361513	36.1513		F18	17.0003	1.1313		F5	28.9781
F9.2	19	5.06	2	A	s3	0.9382	0.7648	5.90123	15.9923	127.939	20.9021	4.13086	0.252838	25.2838						F9	30.1571
F9.2	20	5.09	2	B	s3	0.9346	0.7612	5.87346	15.9171	127.337	20.2999	3.98819	0.244106	24.4106						F9	36.1513
F12.1	21	5.02	1	A	s3	0.9928	0.8194	6.32253	17.1341	137.072	30.0358	5.98323	0.285121	28.5121						F9	25.2838
F12.1	22	5.07	1	B	s3	0.9835	0.8101	6.25077	16.9396	135.517	28.4801	5.61738	0.267686	26.7686						F9	24.4106
F12.2	23	5.05	2	A	s3	0.9725	0.7991	6.1659	16.7096	133.677	26.64	5.27524	0.251382	25.1382						F12	28.5121
F12.2	24	5.04	2	B	s3	0.9741	0.8007	6.17824	16.743	133.944	26.9076	5.33881	0.254412	25.4412						F12	26.7686
F18.1	25	5.04	1	A	s3	0.9528	0.7794	6.01389	16.2976	130.381	23.3445	4.63184	0.157548	15.7548						F12	25.1382
F18.1	26	5.05	1	B	s3	0.9582	0.7848	6.05556	16.4106	131.284	24.2478	4.80155	0.16332	16.332						F12	25.4412
F18.2	27	5.05	2	A	s3	0.972	0.7986	6.16204	16.6991	133.593	26.5563	5.25868	0.178869	17.8869						F18	15.7548
F18.2	28	5.08	2	B	s3	0.9742	0.8008	6.17901	16.7451	133.961	26.9244	5.30007	0.180277	18.0277						F18	16.332
Blank1	29			A	s3	0.8028	0.6294	4.85648	13.1611	105.289										F18	17.8869
Blank1	30			B	s3	0.8146	0.6412	4.94753	13.4078	107.262										F18	18.0277
Blank2	31			A	s3	0.8332	0.6598	5.09105	13.7967	110.374
Blank2	32			B	s3	0.7998	0.6264	4.83333	13.0983	104.787		y = 0,1296x + 0,0528
Blank3	33			A	s3	0.8102	0.6368	4.91358	13.3158	106.526
Blank3	34			B	s3	0.8189	0.6455	4.98071	13.4977	107.982		0.0528
												0.1296
								Blank mean	Blank SD
								107.037	0.252862

## Sheet: S4
													mM (1 BLANK)
Sample	Order	Initial weight	Batch	Duplicate	Sampling	ABS S4	ABS - blank	mM free aa []	Dil digestion OPA	Dil digestion digestion	No enzymes (mg/L)	Divided sample weight	Free NH2 in mM	Digestibility %
F1.1	1	5.09	1	A	s4	0.8774	0.704	5.4321	14.721	117.768	12.4822	2.45229	0.100095	10.0095		OPA before digestion (mM) 1 BLANK	mean	std			anova
F1.1	2	5.06	1	B	s4	0.8966	0.7232	5.58025	15.1225	120.98	15.694	3.10159	0.126597	12.6597		1	24.4997	5.56204		S4	Digestibility %
F1.2	3	5.03	2	A	s4	1.0132	0.8398	6.47994	17.5606	140.485	35.1993	6.99788	0.285631	28.5631		3	28.4976	2.91979		F1	28.5631
F1.2	4	5.03	2	B	s4	1.005	0.8316	6.41667	17.3892	139.113	33.8276	6.72517	0.2745	27.45		4	28.5764	12.9255		F1	27.45
F3.1	5	5.04	1	A	s4	0.8966	0.7232	5.58025	15.1225	120.98	15.694	3.11389	0.109269	10.9269		5	47.8112	2.16336		F3	18.8652
F3.1	6	5.03	1	B	s4	0.839	0.6656	5.1358	13.918	111.344	6.05847	1.20447	0.0422655	4.22655		9	16.338	5.86678		F3	20.7507
F3.2	7	5.06	2	A	s4	0.9654	0.792	6.11111	16.5611	132.489	27.2032	5.37612	0.188652	18.8652		12	20.9849	11.6242		F4	59.027
F3.2	8	5.05	2	B	s4	0.9813	0.8079	6.2338	16.8936	135.149	29.863	5.91346	0.207507	20.7507		18	29.3996	15.171		F4	53.5019
F4.1	9	5.05	1	A	s4	1.0724	0.899	6.93673	18.7985	150.388	45.1025	8.9312	0.312537	31.2537						F5	32.8806
F4.1	10	5.04	1	B	s4	0.9855	0.8121	6.2662	16.9814	135.851	30.5656	6.0646	0.212224	21.2224						F5	33.5208
F4.2	11	5.06	2	A	s4	1.313	1.1396	8.79321	23.8296	190.637	85.3511	16.8678	0.59027	59.027		Sampling 4	Mean	SD		F9	35.3541
F4.2	12	5.03	2	B	s4	1.2625	1.0891	8.40355	22.7736	182.189	76.9032	15.2889	0.535019	53.5019		F1	28.0066	0.78709		F9	34.3814
F5.1	13	5.04	1	A	s4	1.0218	0.8484	6.5463	17.7405	141.924	36.638	7.26944	0.152045	15.2045		F3	19.8079	1.3333		F12	36.1501
F5.1	14	5.08	1	B	s4	1.1396	0.9662	7.45525	20.2037	161.63	56.344	11.0913	0.231982	23.1982		F4	56.2644	3.90687		F12	29.6634
F5.2	15	5.06	2	A	s4	1.2783	1.1049	8.52546	23.104	184.832	79.5463	15.7206	0.328806	32.8806		F5	33.2007	0.452667		F12	36.476
F5.2	16	5.05	2	B	s4	1.2866	1.1132	8.58951	23.2776	186.22	80.9348	16.0267	0.335208	33.5208		F9	34.8677	0.687857		F18	20.3798
F9.1	17	5.03	1	A	s4	0.8827	0.7093	5.47299	14.8318	118.655	13.3688	2.65781	0.162677	16.2677		F12	34.0965	3.84263		F18	20.6549
F9.1	18	5.04	1	B	s4	0.8815	0.7081	5.46373	14.8067	118.454	13.168	2.61271	0.159916	15.9916		F18	21.5713	1.31887		F18	22.0182
F9.2	19	5.06	2	A	s4	0.9775	0.8041	6.20448	16.8141	134.513	29.2273	5.77615	0.353541	35.3541						F18	23.2323
F9.2	20	5.09	2	B	s4	0.9737	0.8003	6.17515	16.7347	133.877	28.5916	5.61721	0.343814	34.3814
F12.1	21	5.02	1	A	s4	0.9187	0.7453	5.75077	15.5846	124.677	19.391	3.86275	0.184073	18.4073
F12.1	22	5.07	1	B	s4	1.0327	0.8593	6.6304	17.9684	143.747	38.4614	7.58607	0.361501	36.1501
F12.2	23	5.05	2	A	s4	0.9907	0.8173	6.30633	17.0901	136.721	31.4354	6.22484	0.296634	29.6634
F12.2	24	5.04	2	B	s4	1.0334	0.86	6.6358	17.983	143.864	38.5785	7.65446	0.36476	36.476
F18.1	25	5.04	1	A	s4	0.9833	0.8099	6.24923	16.9354	135.483	30.1975	5.99158	0.203798	20.3798
F18.1	26	5.05	1	B	s4	0.9861	0.8127	6.27083	16.994	135.952	30.6659	6.07246	0.206549	20.6549
F18.2	27	5.05	2	A	s4	0.9982	0.8248	6.3642	17.247	137.976	32.6901	6.47328	0.220182	22.0182
F18.2	28	5.08	2	B	s4	1.0102	0.8368	6.45679	17.4979	139.983	34.6975	6.83021	0.232323	23.2323
Blank1	29			A	s4	0.7597	0.5863	4.52392	12.2598	98.0786
Blank1	30			B	s4	0.7446	0.5712	4.40741	11.9441	95.5526
Blank2	31			A	s4	0.8533	0.6799	5.24614	14.217	113.736
Blank2	32			B	s4	0.8059	0.6325	4.8804	13.2259	105.807		y = 0,1296x + 0,0528
Blank3	33			A	s4	0.8269	0.6535	5.04244	13.665	109.32
Blank3	34			B	s4	0.8263	0.6529	5.03781	13.6525	109.22		0.0528
												0.1296
								Blank mean	Blank SD
								105.286	0.884085

[truncated: 3 more sheets: S5, S6, Final]
